# Supplementary material for: Managing slow-moving item: a zero-inflated truncated normal approach for modeling demand
Source: PeerJ Comput Sci. 2020 Sep 14;6:e298. doi: 10.7717/peerj-cs.298 (PMC7924499; doi:10.7717/peerj-cs.298)
Supplement: Supplemental Information 1 [file peerj-cs-06-298-s001.xlsx]

## Sheet: Hoja1
	TC	FR	Sr	Q	r	KL	OC	HC	SC	PropDPUT(\nu)	PropLTD(\nu_s)	muDPUT	sigmaDPUT	muLTD	sigmaLTD
1	270.876	1	0	1597.52	35.9876	0.541301	63.162	0.167731	20.8559	0.152798	0.02	9.28383	4.96588	18.5677	6.52409
2	231.709	1	0	886.129	36.2773	0.325542	47.672	0.254366	24.6847	0.483738	0.33	5.7394	6.03418	11.4788	9.45449
3	266.163	1	0	1930.35	32.1187	0.88675	125.741	0.136397	27.6267	0.501695	0.27	5.53699	6.1211	11.074	8.10659
4	296.319	1	0	2619.83	38.3076	0.629768	139.306	0.112114	25.1191	0.3406	0.16	7.56684	5.94394	15.1337	8.80187
5	185.791	1	0	423.589	29.2789	0.54257	23.6591	0.418281	35.5642	0.639686	0.37	4.34547	5.85105	8.69095	7.53396
6	106.257	1	0.00527203	845.154	19.7712	0.490951	63.6937	0.123391	21.0887	0.811931	0.72	1.89225	4.44384	3.7845	6.52746
7	340.098	1	0.000789994	586.413	25.5203	0.475081	79.0812	0.561921	32.9406	0.69444	0.53	3.34613	5.47307	6.69227	7.844
8	147.356	1	0	2710.46	38.4165	0.828626	50.9755	0.054025	25.2827	0.0735796	0.02	10.6659	3.97445	21.3317	5.75194
9	297.96	1	0	1204.92	34.6092	0.579649	78.9034	0.242778	22.039	0.474717	0.26	6.11942	6.04929	12.2388	8.89289
10	529.398	1	0	1220.28	36.5878	0.50708	88.3664	0.42793	32.0493	0.087748	0.02	9.87833	4.65729	19.7567	6.44718
11	441.012	1	0	1322.26	36.3362	0.510696	80.1955	0.329379	35.4208	0.097688	0.02	9.83682	4.63072	19.6736	6.16199
12	283.452	1	0	1101.72	37.7426	0.550926	42.7837	0.253131	27.6749	0.0542935	0.03	9.8375	4.64654	19.675	6.52357
13	330.584	1	0.00299538	629.575	18.4369	0.798671	134.604	0.513429	47.7921	0.79141	0.67	2.06887	4.60168	4.13774	6.04003
14	310.897	1	0	1498.23	37.0734	0.510277	79.6288	0.204604	30.0292	0.306583	0.11	7.90096	5.62241	15.8019	7.89859
15	487.498	1	0	832.344	25.4656	0.589049	128.303	0.573987	19.9647	0.653901	0.4	4.2457	5.70683	8.4914	7.86364
16	359.616	1	0	1478.65	31.1936	0.562097	121.535	0.240062	24.0748	0.430398	0.21	5.91603	5.91228	11.8321	7.85083
17	131.275	1	0.00231749	1022.06	17.2915	0.376372	85.6743	0.126821	11.8272	0.750681	0.65	2.11755	4.55945	4.2351	5.95563
18	215.607	1	0.0559594	503.541	18.2729	0.37888	64.9599	0.416716	9.70003	0.758201	0.69	2.20968	4.67523	4.41935	7.17906
19	377.123	1	0	961.261	34.1974	1.02004	44.1833	0.387486	37.3942	0.0152428	0	11.1009	3.19054	22.2018	4.26521
20	460.452	1	0	834.572	30.2319	0.542725	102.382	0.538689	31.4401	0.560383	0.33	5.0202	5.88785	10.0404	8.35061
21	624.364	1	0	1311.63	38.4779	0.482499	133.973	0.468168	46.6927	0.264299	0.12	8.23533	5.66976	16.4707	8.3944
22	84.7991	1	0	5135.55	33.0149	0.69429	118.537	0.0164386	28.1039	0.515017	0.3	5.01026	5.88796	10.0205	7.82199
23	492.291	1	0	1071.87	36.3542	0.598695	82.5701	0.451218	30.6491	0.229551	0.06	8.60058	5.5083	17.2012	7.44101
24	418.123	1	0	1010.86	38.087	0.511084	69.1491	0.404941	42.4326	0.290815	0.1	8.19719	5.64701	16.3944	7.96334
25	161.463	1	0	3513.46	31.8508	0.519448	118.949	0.0457103	6.46543	0.383766	0.18	6.49832	6.06428	12.9966	8.16563
26	348.318	1	0	1399.38	38.9425	0.913648	64.7397	0.245646	37.9524	0.0991497	0.03	10.1786	4.49236	20.3572	6.60197
27	309.853	1	0	731.146	27.8285	0.654581	62.1466	0.413563	22.5746	0.535971	0.31	4.87315	5.95632	9.7463	7.43845
28	365.488	1	0	1085.88	34.4027	0.507763	62.4792	0.331314	22.4104	0.240541	0.03	8.56528	5.55392	17.1306	6.72957
29	91.6777	1	7.20924	290.525	3.41763	0.100506	75.6858	0.312367	11.3402	0.978777	0.96	0.229415	1.61293	0.458831	2.26341
30	163.1	1	0	3021.66	36.0524	0.464304	105.541	0.0535629	16.5235	0.44947	0.24	6.34758	6.04245	12.6952	8.86988
31	289.835	1	0	1259.69	26.8654	0.461533	138.34	0.226533	33.83	0.732193	0.5	3.55951	5.47721	7.11902	7.94885
32	248.026	1	0	362.298	26.8905	0.640664	29.4704	0.65056	22.8899	0.624601	0.43	3.96927	5.69409	7.93854	7.72985
33	178.238	1	0.242436	402.354	11.724	0.0682461	94.6542	0.432299	48.2958	0.890103	0.85	0.901462	3.18369	1.80292	4.3281
34	311.938	1	0.00829621	573.058	21.0738	0.376251	90.9366	0.52969	34.1459	0.781256	0.6	2.6122	5.02466	5.2244	6.73721
35	264.342	1	0	892.52	32.9389	0.58509	59.2913	0.288954	27.0509	0.48426	0.31	5.31803	5.99266	10.6361	8.63783
36	12.355	1	0	17103.5	37.1479	0.579509	65.418	0.000721173	21.5534	0.538432	0.4	4.41763	5.80975	8.83527	8.36229
37	569.616	1	0	1011.26	33.5742	0.545268	111.13	0.552541	27.5084	0.441858	0.16	6.96522	5.99774	13.9304	8.15303
38	123.66	1	0	3897.78	37.4811	0.807123	61.5035	0.0315953	21.0889	0.0278558	0.01	10.6914	3.87753	21.3828	5.42309
39	39.429	1	0	5237.89	27.6798	0.77999	82.8	0.00749777	16.389	0.660782	0.48	3.40323	5.36259	6.80647	7.22379
40	377.525	1	0	2033.75	35.9129	0.495444	134.215	0.183787	21.7217	0.282939	0.12	7.75864	5.75658	15.5173	8.13325
41	349.881	1	0.0298016	563.702	18.8881	0.431296	107.931	0.605617	16.3391	0.817644	0.64	2.43149	4.81968	4.86297	7.06365
42	196.313	1	0	519.804	32.4941	0.546989	21.7206	0.363606	17.0329	0.444345	0.19	6.19606	6.01305	12.3921	7.78439
43	115.651	1	0.0156625	185.9	13.22	0.126521	22.3133	0.588083	19.0765	0.845462	0.79	1.23122	3.61423	2.46243	4.8161
44	325.919	1	0.00151512	812.964	25.9691	0.518314	100.634	0.391783	27.0825	0.724943	0.51	3.52323	5.55382	7.04646	8.01912
45	44.015	1	0.0392253	1209.74	12.6997	0.0347018	84.6491	0.0360556	32.1828	0.913271	0.86	0.841355	3.08491	1.68271	4.20706
46	176.047	1	0.000241507	296.436	13.6064	0.277997	64.7357	0.571736	47.484	0.890522	0.83	1.06296	3.39602	2.12591	4.86982
47	531.906	1	0	901.411	31.7178	0.386082	122.004	0.576524	38.7919	0.495337	0.32	5.25978	5.98997	10.5196	8.62284
48	241.355	1	0.000234198	401.136	14.2239	0.288186	90.4292	0.585092	24.3978	0.849099	0.77	1.42609	3.88864	2.85219	5.45095
49	167.592	1	0	1481.68	34.1217	0.454332	54.6975	0.111465	15.8351	0.478767	0.23	6.12854	6.07232	12.2571	8.40977
50	176.034	1	2.79009	416.705	8.29735	0.0695152	105.442	0.415228	21.5556	0.95994	0.91	0.596885	2.62049	1.19377	3.97172
51	93.2126	1	0	1650.33	39.387	0.618738	22.9494	0.0557631	17.7316	0.0897409	0.05	9.0655	5.12105	18.131	7.1957
52	471.492	1	0	1590.5	38.0461	0.511874	125.177	0.292425	42.1865	0.337097	0.12	8.09531	5.6907	16.1906	8.16881
53	239.149	1	0	571.625	14.9342	0.0560304	128.596	0.409707	40.5874	0.88469	0.77	1.42608	3.9904	2.85217	5.28194
54	428.146	1	0	1323.13	33.9383	0.327644	86.31	0.319678	6.29355	0.179106	0.09	8.88249	5.35381	17.765	7.93236
55	318.349	1	0	1198.88	36.4832	0.984329	48.5443	0.262212	19.455	0.0397409	0.02	10.6351	3.96137	21.2701	5.76561
56	245.409	1	0	1200.64	38.1792	0.336979	42.7847	0.201113	41.0578	0.178403	0.03	9.28229	5.03126	18.5646	6.71144
57	225.693	1	0	1661.33	30.661	0.476264	94.6321	0.13424	14.3313	0.52689	0.29	5.3633	5.92105	10.7266	8.26731
58	340.142	1	6.8838e-05	886.752	26.3461	0.398267	118.991	0.375307	41.2419	0.675567	0.52	3.39738	5.42049	6.79475	7.87294
59	246.739	1	0.442755	444.938	11.7198	0.204738	114.695	0.543198	15.0788	0.861703	0.81	1.21375	3.66398	2.4275	5.17142
60	506.275	1	0	1064.42	29.0506	0.456284	137.696	0.467504	13.0768	0.609052	0.34	5.26948	5.94183	10.539	8.99404
61	183.989	1	0	3570.27	37.0684	0.469205	137.159	0.0511891	23.6114	0.441548	0.22	6.51678	6.02696	13.0336	8.83303
62	234.708	1	0.0535318	1060.11	20.9899	0.495659	117.816	0.218248	9.13754	0.778706	0.61	2.84005	5.22632	5.68009	7.77196
63	354.829	1	0	514.557	34.4633	0.34089	38.9537	0.661121	29.1271	0.393247	0.24	6.15568	6.02359	12.3114	8.64514
64	500.687	1	0	874.764	37.1365	0.492921	69.3163	0.55944	38.7404	0.174284	0.08	8.46012	5.49594	16.9202	7.6447
65	198.307	1	0.454837	434.624	11.739	0.219053	116.714	0.445968	35.1014	0.915632	0.87	0.86994	3.18986	1.73988	4.73691
66	377.009	1	0	902.831	37.33	0.613248	52.5888	0.408544	21.0025	0.234495	0.09	8.67432	5.49209	17.3486	7.86749
67	803.144	1	0	1259.36	32.6654	0.705616	133.15	0.631696	12.5771	0.102849	0.01	10.3073	4.1135	20.6145	5.67225
68	148.177	1	0	648.822	28.3047	0.630319	35.5005	0.22118	23.0509	0.667876	0.51	3.59286	5.59171	7.18571	8.14241
69	145.176	1	0.0349351	203.989	13.5136	0.160749	37.1852	0.673624	41.4205	0.916428	0.85	0.993938	3.39079	1.98788	4.88435
70	150.13	1	4.50146	325.273	6.05093	0.069091	60.2133	0.454069	21.7076	0.924092	0.93	0.417073	2.20616	0.834147	3.07117
71	161.362	1	0	826.53	34.953	0.459289	27.1088	0.190207	15.9254	0.403969	0.19	6.56615	6.01509	13.1323	8.25868
72	231.708	1	0	1131.95	36.0213	0.568745	45.8893	0.201032	18.4183	0.319991	0.11	7.68926	5.77779	15.3785	7.88023
73	265.319	1	0	663.088	40.7456	0.537568	29.4479	0.385605	36.4684	0.355423	0.16	7.88691	5.79952	15.7738	8.86959
74	175.63	1	0	1862.62	40.8677	0.48616	55.2923	0.0930495	41.2257	0.285493	0.12	7.99788	5.76036	15.9958	8.34564
75	283.81	1	0.00111552	922.42	24.9915	0.560762	115.113	0.301506	34.927	0.752349	0.57	3.05182	5.24791	6.10365	7.71024
76	124.03	1	0	1314.85	39.601	0.707186	30.4175	0.0925576	29.9755	0.324094	0.16	7.20636	5.9577	14.4127	8.51262
77	411.955	1	0	1082.33	37.3999	0.680491	59.1373	0.37471	25.977	0.0508646	0.03	10.1679	4.55408	20.3359	6.47588
78	303.41	1	0	1121.5	36.2353	0.403147	79.6351	0.26469	46.8617	0.426159	0.3	5.7268	6.02112	11.4536	9.0297
79	422.328	1	0.00181484	718.021	23.8105	0.438008	133.404	0.574005	41.7155	0.739035	0.57	3.03705	5.30112	6.07411	7.48616
80	203.519	1	5.2145	390.413	6.14193	0.0568424	83.1317	0.514084	34.1029	0.955392	0.93	0.411649	2.17057	0.823297	3.02125
81	551.473	1	0	971.847	32.2948	0.373355	102.526	0.556996	11.0963	0.35879	0.19	7.02896	5.85891	14.0579	8.79083
82	270.72	1	0	2974.56	36.9254	0.627355	111.185	0.0904886	35.101	0.0840701	0.01	9.86441	4.56091	19.7288	6.01643
83	270.311	1	0.00138431	588.152	18.2721	0.390596	101.853	0.448835	36.4913	0.854699	0.66	2.08716	4.56479	4.17432	6.01007
84	116.271	1	0	429.325	14.6202	0.0919944	51.2549	0.263444	32.4056	0.873902	0.78	1.29778	3.71307	2.59556	4.93057
85	342.499	1	0	1810.79	36.0573	1.20507	77.8039	0.187653	34.2985	0.0253987	0.01	10.8334	3.62059	21.6668	5.12784
86	265.675	1	0	2847.34	39.3362	0.439958	130.347	0.0925403	42.8385	0.249319	0.12	7.88471	5.79815	15.7694	8.24833
87	497.445	1	0	1262.73	35.8922	0.455227	123.139	0.387151	44.1266	0.365302	0.19	6.86722	6.02902	13.7344	8.46301
88	285.148	1	0	649.871	27.8521	0.592677	57.269	0.426159	20.9493	0.607975	0.4	4.30509	5.78233	8.61018	8.04939
89	282.812	1	0	569.995	27.0423	0.322834	64.3998	0.479005	44.8419	0.723595	0.54	3.31035	5.35672	6.62071	7.93646
90	138.921	1	0.00466213	488.031	18.8582	0.415824	58.7078	0.275728	45.0634	0.876007	0.78	1.52688	4.06867	3.05376	6.19337
91	353.377	1	0	1106.63	33.7515	0.502399	85.7955	0.313241	23.102	0.482429	0.25	6.12486	6.12112	12.2497	8.697
92	174.344	1	0.659577	306.327	10.9984	0.0484658	56.3392	0.550472	44.1404	0.942474	0.86	0.833771	3.05497	1.66754	4.166
93	227.609	1	0	402.68	15.4167	0.27482	61.6493	0.5496	13.7396	0.839386	0.67	1.98023	4.48591	3.96047	5.70334
94	85.7188	1	4.10822	500.935	7.12906	0.0440864	76.839	0.168914	19.5748	0.961457	0.95	0.369441	2.11329	0.738883	3.45154
95	327.249	1	0	1014.5	27.342	0.32633	128.404	0.316214	33.9578	0.69265	0.54	3.47203	5.47456	6.94405	8.37841
96	456.615	1	0	1417.09	34.4272	0.409363	127.885	0.317567	17.3444	0.398905	0.22	6.83105	5.9946	13.6621	8.9839
97	366.847	1	0	552.154	33.3647	0.300483	48.2862	0.638581	39.1572	0.506015	0.3	5.5232	6.03854	11.0464	8.53603
98	133.535	1	0	689.456	15.6248	0.141702	86.2178	0.190164	37.1657	0.878992	0.76	1.43622	3.91395	2.87245	5.16001
99	431.619	1	0	674.19	31.2152	0.556076	70.554	0.62154	29.4204	0.46148	0.28	5.48515	5.99789	10.9703	8.25835
100	642.648	1	0	1460.46	35.469	0.604067	134.673	0.435089	15.7108	0.165043	0.06	9.43962	4.89533	18.8792	7.32253
101	419.151	1	0	798.42	34.1892	0.496503	51.4833	0.51419	8.72755	0.16218	0.07	8.72162	5.52957	17.4432	7.69566
102	42.4479	1	0	9439.59	39.8676	0.497402	86.7519	0.00448385	33.7275	0.403989	0.21	6.30893	5.94504	12.6179	8.34291
103	147.666	1	1.25251	527.587	10.269	0.247866	92.6905	0.275571	9.11374	0.913572	0.84	1.00938	3.33172	2.01876	4.81451
104	328.221	1	0	1990.36	35.1274	0.97823	116.898	0.163268	41.6423	0.388168	0.07	7.57932	5.83256	15.1586	7.21438
105	113.643	1	0	1153.62	38.0587	0.467051	23.1715	0.0965959	38.72	0.24761	0.09	7.5999	5.78989	15.1998	7.42344
106	522.367	1	0	1063.75	34.8849	0.946127	70.9411	0.484818	29.9163	0.036591	0.01	10.5935	3.8448	21.187	5.23773
107	437.425	1	0.000355164	696.504	25.1592	0.45054	102.575	0.612878	22.0354	0.658437	0.43	3.9703	5.64389	7.94059	7.7724
108	525.515	1	0	1207.73	37.1243	0.473679	112.764	0.427349	41.3694	0.315381	0.15	7.57233	5.73339	15.1447	8.41808
109	381.275	1	0.0707382	629.834	17.3744	0.382168	112.066	0.594378	6.90879	0.698073	0.57	2.86963	5.08271	5.73927	7.1457
110	302.115	1	0	1450.81	35.1721	0.635316	96.986	0.204991	41.1118	0.442989	0.24	6.09433	5.97836	12.1887	8.44602
111	97.5798	1	0	2073.5	30.2575	0.504397	69.888	0.0465572	20.5817	0.650976	0.46	3.92347	5.70204	7.84694	8.24261
112	174.516	1	0	1483.05	26.235	0.606168	114.949	0.116096	35.4863	0.72898	0.57	3.043	5.30167	6.08599	7.68403
113	419.851	1	0	1713.31	33.4183	0.412392	120.443	0.242615	9.25593	0.207798	0.1	8.09992	5.64112	16.1998	7.95272
114	449.298	1	0	1690.68	38.4715	0.576502	131.66	0.262202	44.4473	0.2034	0.13	7.79801	5.73814	15.596	8.48355
115	70.0809	1	0	4987.63	40.0139	0.324029	77.4462	0.0139733	35.0236	0.433758	0.25	6.14843	5.9718	12.2969	8.86725
116	191.028	1	0	3106.7	34.4396	0.585214	130.544	0.0610553	39.4729	0.482186	0.19	6.18359	6.00266	12.3672	7.722
117	265.226	1	0	2450.86	37.6151	0.417372	101.909	0.107329	16.5901	0.18427	0.09	8.66603	5.50519	17.3321	7.87708
118	442.384	1	0.00123322	842.707	26.2832	0.366735	119.855	0.514013	13.9973	0.644691	0.46	4.17143	5.7946	8.34286	8.76384
119	261.159	1	0	750.357	26.197	0.581713	75.2316	0.339345	27.5456	0.656687	0.51	3.479	5.48164	6.958	7.87463
120	159.227	1	1.3064	445.682	9.62157	0.0986709	90.7125	0.350966	18.9772	0.93652	0.86	0.826911	3.03936	1.65382	4.14576
121	145.305	1	0.00502224	1051.75	20.041	0.301791	82.632	0.136206	16.9726	0.810549	0.6	2.49519	4.88529	4.99037	6.39161
122	179.154	1	0.0228862	265.662	17.7788	0.453545	28.2197	0.641952	9.79628	0.79348	0.67	2.18197	4.6115	4.36394	6.65162
123	374.734	1	0	1969.6	36.1994	0.972741	95.369	0.188806	21.3836	0.0307288	0.02	10.5206	4.11364	21.0412	5.80801
124	272.338	1	0	477.295	28.1737	0.401512	41.5711	0.547694	24.9013	0.616492	0.43	4.11146	5.71604	8.22292	8.11831
125	109.727	1	0.00831514	507.592	19.778	0.419239	35.8654	0.209698	17.5461	0.822803	0.69	2.05524	4.57194	4.11048	6.5146
126	154.958	1	0	885.027	32.3518	0.612365	35.3701	0.170845	22.9801	0.507472	0.3	5.1827	5.95623	10.3654	8.14637
127	195.583	1	0	541.48	27.6178	0.72708	35.6576	0.348479	47.1718	0.569208	0.4	3.92524	5.63147	7.85048	7.13298
128	126.261	1	0.00219159	1619.89	23.9111	0.534142	91.1931	0.0770957	19.0345	0.693046	0.54	3.0375	5.22692	6.07501	7.08622
129	757.777	1	0	1137.17	33.5416	0.623187	129.873	0.657345	17.3168	0.187193	0.05	8.96616	5.18774	17.9323	7.02944
130	77.4974	1	8.61739	402.872	3.09381	0.0203695	129.255	0.191068	11.8865	0.98739	0.97	0.18336	1.49073	0.36672	2.09739
131	271.226	1	0.0131423	512.549	21.5729	0.458087	62.1589	0.513496	15.356	0.727169	0.56	2.96329	5.24587	5.92658	7.28323
132	339.839	1	0	600.841	36.5478	0.568801	29.8253	0.548846	25.3372	0.204354	0.03	9.10042	5.27617	18.2008	6.89985
133	360.716	1	0	587.922	40.0391	0.644375	31.054	0.591409	34.8408	0.286454	0.09	9.01751	5.29028	18.035	8.01813
134	253.346	1	0	1129.82	29.9431	0.727719	83.934	0.220187	43.2838	0.613447	0.34	4.58725	5.78586	9.1745	7.68267
135	61.2979	1	0.335868	1783.86	12.1282	0.165792	119.388	0.0341773	5.30633	0.884459	0.8	1.22954	3.70863	2.45907	4.95911
136	390.241	1	9.78428e-05	704.634	24.6921	0.596366	93.2769	0.540922	21.1234	0.688202	0.43	3.94416	5.72629	7.88832	7.50048
137	678.176	1	0	1326	36.8023	0.533919	128.073	0.504664	42.4319	0.0800814	0.03	9.49087	4.93049	18.9817	6.8328
138	207.607	1	0.00536296	769.423	21.2797	0.49824	87.947	0.264185	35.3011	0.802782	0.62	2.43086	4.82592	4.86172	6.60863
139	360.135	1	0	967.537	35.3732	0.437712	65.5046	0.364271	27.4731	0.359535	0.16	7.13123	5.89262	14.2625	8.17992
140	512.428	1	0	1518	40.1305	0.718644	105.374	0.333141	42.4537	0.101069	0.06	9.97968	4.78308	19.9594	7.41756
141	61.7179	1	0	9061.13	40.2076	0.553109	115.48	0.00679106	22.5293	0.428338	0.22	6.61413	6.10241	13.2283	8.83587
142	612.45	1	0	941.517	28.2604	0.305954	113.779	0.640568	5.97392	0.412634	0.17	6.83656	5.94669	13.6731	8.35756
143	518.771	1	0	784.447	37.1696	0.974305	52.7469	0.647724	35.3916	0.137562	0.02	10.3514	4.30107	20.7027	6.16887
144	10.3485	1	0	9544.9	44.2586	0.497396	17.627	0.00108091	16.5624	0.377643	0.13	7.65297	5.87308	15.3059	8.2457
145	148.407	1	0	1365.17	37.6338	0.788353	26.3534	0.107386	15.7741	0.0584098	0.02	10.403	4.14492	20.8061	5.98031
146	209.744	1	0	322.042	15.0944	0.132644	62.8029	0.627416	48.6311	0.896814	0.76	1.41931	3.86156	2.83863	5.08963
147	197.113	1	0.00549179	459.193	17.3376	0.660268	61.5199	0.417063	18.7205	0.810242	0.69	1.95492	4.44694	3.90984	6.13715
148	128.18	1	0	4202.01	39.8838	0.492601	109.891	0.0303131	30.3769	0.303935	0.23	6.67206	6.03421	13.3441	9.07313
149	155.896	1	0.00129252	412.488	24.0767	0.392736	32.388	0.361396	38.8033	0.744035	0.62	2.59673	4.99653	5.19346	7.13221
150	307.047	1	0	501.575	34.057	0.463391	24.5375	0.591595	6.80957	0.292036	0.1	8.30889	5.57919	16.6178	7.97374
151	226.642	1	0	465.063	28.3078	0.558246	38.4121	0.466169	45.9013	0.700577	0.49	3.59564	5.54107	7.19128	7.85715
152	354.17	1	0	1517.9	36.39	0.830485	77.1775	0.230665	13.062	0.131767	0.06	9.43316	4.89932	18.8663	7.24469
153	520.639	1	0	1298.41	33.459	0.929549	83.4025	0.397477	6.08579	0.0593179	0.02	11.0061	3.61952	22.0123	5.63501
154	639.445	1	0	956.202	34.9622	0.586584	87.1447	0.657691	22.987	0.14	0.02	9.45273	4.96824	18.9055	6.65663
155	160.786	1	0	503.768	33.5537	0.879706	22.2513	0.304633	38.0049	0.511334	0.37	4.75949	6.0004	9.51897	8.49162
156	234.96	1	0	333.238	29.5001	0.559233	23.8995	0.663174	30.9405	0.626096	0.41	4.22109	5.74182	8.44218	8.09339
157	490.356	1	0	1139.38	29.8483	0.458397	105.513	0.424581	5.82689	0.295027	0.16	7.15599	6.03906	14.312	8.37457
158	184.183	1	0	2615.89	32.745	0.507041	136.102	0.069792	26.6372	0.590723	0.38	4.8068	5.94724	9.61359	8.69588
159	272.963	1	0.00207154	455.674	23.0032	0.533354	52.9837	0.57772	38.2618	0.747554	0.51	3.09678	5.25667	6.19357	6.70492
160	55.8624	1	0	2998.42	39.043	0.548988	35.5639	0.0184689	13.2825	0.413229	0.25	6.39578	6.01878	12.7916	9.0097
161	273.769	1	0	1310.21	31.0893	0.501365	86.1485	0.205832	12.2563	0.462872	0.29	5.61853	6.02253	11.2371	8.63212
162	252.19	1	0	414.068	34.8726	0.4399	22.7216	0.577079	26.8966	0.425201	0.25	5.96508	6.02322	11.9302	8.67275
163	141.218	1	0	5971.31	39.6244	0.458713	135.725	0.02356	29.9133	0.257055	0.08	8.47872	5.55616	16.9574	7.64813
164	56.439	1	0	2404.94	35.9352	0.36729	40.6867	0.0232084	39.6452	0.646933	0.4	4.51938	5.81505	9.03876	8.57397
165	164.357	1	0	2286.87	31.0273	0.480524	116.427	0.0711766	14.5775	0.59161	0.45	4.3797	5.82508	8.7594	9.05921
166	512.338	1	0	1376.44	37.98	0.425664	108.114	0.366791	40.3008	0.191986	0.07	8.80503	5.31786	17.6101	7.65564
167	255.819	1	0	370.281	27.741	0.613783	32.0041	0.655394	38.3282	0.632528	0.45	3.84623	5.6656	7.69246	7.67764
168	391.266	1	0	847.061	35.5879	0.60151	48.4602	0.452704	15.5833	0.15163	0.04	9.18198	5.32474	18.364	7.05883
169	138.309	1	6.5245	256.305	3.50278	0.0185164	71.1462	0.533035	29.0127	0.985787	0.97	0.18423	1.50954	0.36846	2.12412
170	42.1715	1	0.000320671	3628.49	25.0084	0.347563	88.5406	0.0115577	32.989	0.805038	0.65	2.35399	4.81618	4.70798	6.83066
171	359.858	1	0	553.946	34.9064	0.445183	39.2236	0.625353	35.6172	0.42251	0.17	6.70177	6.00039	13.4035	8.10177
172	350.782	1	0	721.168	27.9077	0.366923	76.4817	0.473872	13.9608	0.551536	0.43	4.41422	5.86549	8.82844	8.8125
173	220.203	1	0.407393	366.746	11.842	0.161402	98.28	0.584595	30.583	0.877952	0.85	0.972845	3.319	1.94569	4.80616
174	280.331	1	0.0430057	477.842	21.7558	0.769904	47.3416	0.569648	6.14437	0.690242	0.46	3.74276	5.56135	7.48553	7.72936
175	350.226	1	0.0416295	594.226	22.5095	0.483942	68.453	0.57543	6.30764	0.692975	0.44	4.05058	5.69099	8.10117	8.04592
176	61.47	1	0	5534.64	35.6345	0.460492	94.3649	0.0110549	25.3741	0.582464	0.36	4.91586	5.94533	9.83171	8.59703
177	44.1038	1	0.000186885	1299.81	15.4558	0.19842	76.0082	0.0335844	40.752	0.87012	0.84	1.02252	3.36918	2.04503	4.85498
178	550.95	1	0	888.59	32.8902	0.39055	95.3817	0.606963	12.1182	0.395699	0.21	6.883	5.92585	13.766	9.09208
179	233.474	1	0.0129349	475.212	21.1455	0.375025	61.9528	0.474885	28.221	0.763753	0.65	2.35737	4.75169	4.71474	6.98078
180	74.163	1	0	2861.01	25.6974	0.468401	108.337	0.0257387	39.3341	0.754179	0.6	2.66394	4.90322	5.32788	7.04794
181	169.886	1	0.0714425	265.905	12.461	0.177767	49.531	0.615432	25.0287	0.889103	0.8	1.16154	3.5106	2.32307	4.69547
182	107.756	1	0.728375	746.611	10.7733	0.0650872	116.095	0.142538	33.6971	0.928442	0.87	0.774204	2.95219	1.54841	4.03831
183	272.667	1	0	422.474	36.239	0.626314	18.131	0.616784	13.5385	0.255048	0.09	8.31744	5.58636	16.6349	7.8648
184	394.613	1	0	2259.53	36.0178	1.21519	117.401	0.173465	25.0391	0.0539755	0.01	10.3336	4.13424	20.6672	5.81547
185	107.523	1	2.70344	611.313	8.47783	0.0932181	49.5987	0.173312	45.3951	0.967289	0.91	0.51764	2.39418	1.03528	3.31372
186	102.164	1	0.00079179	1260.67	17.1154	0.30272	119.031	0.0801379	45.2135	0.922387	0.76	1.46531	3.89751	2.93062	5.37843
187	618.62	1	0	1291.78	36.6956	0.478155	110.232	0.472634	31.5158	0.0909382	0.03	9.80108	4.70552	19.6022	6.70826
188	583.372	1	0	923.381	33.4337	0.468037	82.0506	0.621184	7.98618	0.214814	0.08	8.84253	5.31696	17.6851	7.8379
189	94.5004	1	0	3467.35	36.1099	0.404087	75.846	0.0270643	26.9482	0.47369	0.24	5.87673	6.04912	11.7535	8.27511
190	323.365	1	0	1155.18	27.9521	0.753104	129.199	0.275122	49.5362	0.597101	0.44	3.89267	5.65575	7.78533	7.72417
191	211.686	1	0	2237.87	35.5948	0.502007	105.18	0.0936141	44.268	0.406832	0.22	6.10598	6.04529	12.212	8.17807
192	115.553	1	0	6606.78	36.7675	0.598276	107.918	0.017444	8.02741	0.119806	0.02	9.66516	4.77259	19.3303	6.58943
193	436.724	1	0	2000.4	33.8139	0.892944	109.945	0.216998	7.70233	0.0720948	0.02	10.8191	3.85455	21.6382	5.56033
194	600.907	1	0	1102.45	34.5823	0.496778	97.7548	0.537129	13.5401	0.189682	0.06	9.14825	5.24151	18.2965	7.32503
195	510.712	1	0	934.392	35.9099	0.416435	82.3398	0.53491	32.0745	0.295482	0.11	7.76973	5.78047	15.5395	8.01029
196	198.966	1	0	386.607	28.2718	0.620748	27.5953	0.488096	38.7793	0.653493	0.48	3.62149	5.44095	7.24298	7.84663
197	455.592	1	0	657.344	26.7515	0.628041	85.7226	0.675179	30.0082	0.582959	0.32	4.66216	5.884	9.32432	7.32694
198	281.781	1	0	520.18	34.2677	0.415356	34.0134	0.518799	34.1087	0.463417	0.28	5.65371	6.00268	11.3074	8.61117
199	204.363	1	0	1441.87	36.2115	0.637734	43.38	0.140004	14.0348	0.158792	0.03	9.19131	5.11795	18.3826	6.78274
200	406.935	1	0	925.967	37.4555	0.594267	65.4977	0.429244	23.9794	0.301339	0.16	7.69744	5.83794	15.3949	8.76082
201	460.859	1	0.0189052	721.632	24.0242	0.357077	126.818	0.623916	17.8108	0.717482	0.52	3.50026	5.45603	7.00052	8.27122
202	85.4563	1	0.00156805	1836.68	24.229	0.45818	87.1571	0.0460424	39.0878	0.743122	0.63	2.43947	4.83876	4.87894	6.87097
203	570.641	1	0	1072.87	33.0738	0.609493	96.6079	0.524082	18.5689	0.197481	0.03	8.55381	5.5458	17.1076	6.82954
204	324.324	1	0.00704541	670.989	20.4207	0.480088	121.338	0.47235	37.7238	0.760131	0.63	2.39565	4.82447	4.79131	6.67551
205	382.281	1	0	734.096	35.8101	0.574506	46.9611	0.507027	30.2857	0.219472	0.09	7.97032	5.6131	15.9406	7.54466
206	106.414	1	0	7613.56	41.8497	0.91108	105.516	0.0139387	33.7622	0.105206	0.04	10.4896	4.26047	20.9792	6.62904
207	479.965	1	0	831.581	32.645	0.52225	87.0886	0.563358	30.1031	0.423634	0.23	6.12788	6.06788	12.2558	8.29024
208	224.281	1	0.00959026	428.318	16.0902	0.372694	58.4996	0.50969	8.42004	0.85298	0.66	2.18657	4.69587	4.37314	6.34921
209	361.985	1	0	1104.53	34.2041	0.726972	91.7915	0.321184	40.7629	0.438789	0.26	5.84764	6.08719	11.6953	8.50806
210	261.143	1	0	790.409	29.4765	0.432166	53.5345	0.322569	9.22841	0.51328	0.34	5.15667	5.98469	10.3133	8.79588
211	481.642	1	0	1189.44	31.4262	0.870916	68.5798	0.401988	9.17083	0.0196982	0	11.3601	2.82858	22.7202	3.88811
212	130.31	1	0	938.038	36.4858	0.677491	27.4211	0.135369	35.0833	0.495033	0.24	5.9505	6.06336	11.901	8.37573
213	503.079	1	0	856.466	36.0533	0.609992	77.8392	0.573166	45.2846	0.322217	0.13	7.3991	5.81432	14.7982	8.01808
214	424.972	1	0	1289.43	31.3049	0.354938	95.1103	0.325615	5.11111	0.298519	0.13	7.79736	5.74131	15.5947	8.27824
215	340.021	1	0	842.171	36.2687	0.633377	52.3363	0.393622	17.3615	0.362815	0.17	7.30725	6.04915	14.6145	8.84136
216	367.957	1	0	665.571	36.128	0.530933	45.08	0.535378	20.6838	0.309646	0.18	7.20681	5.90019	14.4136	8.75199
217	379.351	1	0	654.108	38.5228	0.482102	36.948	0.562171	27.3229	0.139085	0.09	8.91772	5.36996	17.8354	7.83355
218	186.035	1	0.0399175	337.175	13.2259	0.18795	83.6067	0.533882	49.0984	0.896282	0.85	0.971695	3.32563	1.94339	4.87605
219	304.139	1	0.000423184	878.658	25.7054	0.741106	79.7789	0.339684	6.98361	0.612039	0.41	4.50286	5.9246	9.00571	8.59445
220	158.932	1	0.00210071	356.626	15.7805	0.466863	43.0401	0.430803	14.779	0.808277	0.72	1.74259	4.26169	3.48517	5.75654
221	67.6616	1	0	2636.33	25.019	0.723277	82.4945	0.0254801	15.7256	0.74956	0.56	2.94071	5.12961	5.88143	7.21143
222	314.543	1	0	2068.42	38.8252	0.46938	97.9416	0.150555	37.7517	0.205455	0.06	9.00913	5.21688	18.0183	7.41534
223	467.576	1	0	1203.82	31.419	0.385045	136.827	0.381959	29.7771	0.47983	0.28	5.54169	6.06443	11.0834	8.38255
224	585.67	1	0	1654.98	32.7027	0.971928	124.252	0.351446	13.453	0.0443618	0	10.6125	3.81889	21.225	5.02342
225	468.403	1	0	1846.27	38.5751	0.528802	125.155	0.251004	47.6157	0.185637	0.05	9.36488	5.00586	18.7298	7.17769
226	176.34	1	0.582894	256.049	10.5814	0.119735	58.9597	0.663861	45.7786	0.940653	0.89	0.698297	2.78176	1.39659	4.21006
227	352.211	1	0.0195652	655.332	15.2182	0.471923	133.427	0.528932	7.4178	0.769502	0.64	2.32961	4.765	4.65923	6.60518
228	266.922	1	0	618.763	34.7694	0.255885	25.1232	0.419682	8.25301	0.189855	0.06	8.76136	5.35374	17.5227	7.39432
229	436.25	1	0	1174.42	29.0083	0.518545	129.036	0.365762	16.4251	0.493159	0.29	5.35563	5.96816	10.7113	8.26034
230	481.875	1	0	1853.2	37.2566	0.649711	120.929	0.257631	44.9981	0.0987106	0.02	10.0228	4.42068	20.0455	6.23851
231	483.875	1	0	1706.02	35.4867	0.384754	130.331	0.280615	26.3412	0.299415	0.06	8.58434	5.5015	17.1687	7.25735
232	254.747	1	0.0121147	602.694	19.0252	0.542999	87.9029	0.412842	17.9378	0.827212	0.65	2.3312	4.84363	4.6624	6.72125
233	182.415	1	0.00139841	482.73	25.9168	0.304007	26.9443	0.364827	5.46947	0.582653	0.42	4.32097	5.76068	8.64194	8.4464
234	148.425	1	0	3571.25	36.4747	0.351794	129.041	0.0412688	25.1227	0.49445	0.32	5.58741	6.05187	11.1748	9.16155
235	248.447	1	0.00336857	939.238	22.706	0.468348	111.762	0.259792	36.5741	0.747923	0.57	2.80595	5.10255	5.6119	6.88445
236	383.242	1	0	1840.87	36.1194	0.91698	90.5144	0.206509	22.652	0.0378528	0.02	10.5912	3.93269	21.1825	5.69178
237	406.656	1	0.000158871	752.161	25.6145	0.73125	105.959	0.52809	34.4369	0.63793	0.43	3.86231	5.67656	7.72461	7.45193
238	108.957	1	0	3950.58	39.4608	0.412352	74.0016	0.0274162	12.026	0.314275	0.14	7.92073	5.81425	15.8415	8.63467
239	530.671	1	0	1111.93	34.7232	0.618975	121.244	0.468141	45.0787	0.417211	0.19	6.53952	6.09858	13.079	8.36581
240	284.754	1	0.00393158	798.54	24.8662	0.576279	98.8826	0.348426	34.6289	0.738534	0.56	3.07372	5.28247	6.14743	7.64325
241	189.844	1	0	423.147	32.3539	0.660872	17.699	0.427924	13.2095	0.482654	0.23	5.9303	6.04448	11.8606	8.22023
242	48.9883	1	0.00153294	742.831	23.4051	0.33235	22.8853	0.0642892	36.4153	0.795134	0.68	2.11827	4.62349	4.23653	6.54272
243	460.596	1	0	1343.17	36.1344	0.379725	113.584	0.337527	34.2986	0.337859	0.15	7.34401	5.88286	14.688	8.31051
244	271.733	1	0.0105813	407.407	18.2929	0.269974	76.8012	0.644063	36.0212	0.846289	0.71	1.89733	4.37791	3.79467	6.28362
245	192.842	1	0.00150612	773.803	23.242	0.46281	71.673	0.243649	32.9054	0.723473	0.58	2.78643	5.06222	5.57285	6.97199
246	66.0411	1	2.21278	996.649	8.55734	0.0592414	92.477	0.065705	44.7661	0.942028	0.92	0.467571	2.30364	0.935141	3.19773
247	152.718	1	0	840.558	37.7268	0.451588	25.9265	0.176531	36.6009	0.403366	0.19	6.59009	6.02292	13.1802	8.37277
248	180.456	1	0.0100793	900.199	23.0019	0.597738	55.1071	0.197162	6.28276	0.650843	0.41	3.96707	5.70398	7.93414	7.30033
249	123.628	1	0.850298	642.758	10.9429	0.0784911	105.846	0.189495	34.1672	0.948462	0.87	0.795733	3.04003	1.59147	4.15905
250	193.881	1	0	649.269	38.3376	0.421465	22.8455	0.288065	19.2471	0.317993	0.19	7.28144	5.88498	14.5629	8.86367
251	483.335	1	0	985.349	34.6412	0.853124	62.908	0.483555	16.1081	0.0513101	0.02	10.2235	4.15073	20.4469	5.88422
252	396.699	1	0	587.73	31.7271	0.433953	62.2352	0.650795	33.8236	0.584172	0.36	4.94812	5.92676	9.89624	8.74264
253	753.662	1	0	1162.95	35.3883	0.352698	137.378	0.638087	27.1235	0.167731	0.08	8.60523	5.38588	17.2105	7.64514
254	195.16	1	0.0267722	843.809	19.8591	0.472515	84.3178	0.227347	9.65127	0.82153	0.62	2.62184	5.04452	5.24368	7.17116
255	489.799	1	0	1179.47	35.7287	0.488105	114.196	0.407624	24.3276	0.410878	0.22	6.80239	6.03874	13.6048	9.17714
256	250.546	1	0	654.05	30.436	0.30474	36.1244	0.372617	6.42391	0.434145	0.25	6.04451	6.0922	12.089	8.67282
257	416.317	1	0.0210321	927.224	22.8189	0.767379	138.822	0.441686	12.3668	0.64866	0.47	3.74014	5.60819	7.48028	7.77498
258	88.4148	1	0	783.242	29.3641	0.367217	30.9239	0.109608	43.3448	0.737618	0.6	2.97862	5.26693	5.95724	8.05056
259	250.678	1	0	447.152	28.8477	0.260481	31.4958	0.537177	10.5844	0.504634	0.41	4.67146	5.89714	9.34293	8.79757
260	442.955	1	0.0113004	925.808	23.2579	0.520865	138.837	0.470671	16.1029	0.622386	0.41	3.97524	5.71322	7.95048	7.35063
261	616.189	1	0	916.744	35.3868	0.709707	69.2393	0.662498	38.3536	0.0450165	0.01	11.0155	3.53423	22.031	5.02608
262	423.817	1	0	981.528	34.3119	0.607771	99.6472	0.421848	37.7836	0.480425	0.32	5.58694	6.10814	11.1739	9.07093
263	483.24	1	0	1457.46	35.9425	0.55537	98.5457	0.327834	39.4931	0.109305	0.01	9.68021	4.72452	19.3604	6.13211
264	285.221	1	0	780.325	35.8609	0.481554	32.088	0.357602	13.2299	0.169635	0.04	9.29576	5.02944	18.5915	6.9088
265	148.537	1	3.4614	548.247	7.68201	0.0971857	114.655	0.267927	8.13355	0.912358	0.87	0.772522	2.9482	1.54504	4.0331
266	346.95	1	0	1040.14	34.2551	0.668176	65.8559	0.327417	12.8016	0.32103	0.15	7.3683	5.89528	14.7366	8.37548
267	244.065	1	0	1703.23	26.6819	0.648965	139.541	0.141746	19.6368	0.617748	0.42	4.03678	5.72845	8.07356	7.77452
268	294.057	1	0	1332.66	39.7672	0.661392	58.0109	0.217142	26.2205	0.16564	0.08	9.1065	5.3432	18.213	7.94082
269	88.2756	1	7.81168	287.488	3.82103	0.0162466	49.1122	0.303517	11.7061	0.965025	0.96	0.244522	1.71837	0.489043	2.41136
270	351.165	1	0.0198289	517.773	18.3341	0.455046	99.3133	0.661037	15.2459	0.778624	0.63	2.43699	4.83806	4.87399	6.88181
271	247.089	1	0	681.85	30.6739	0.506418	38.7288	0.352517	11.5349	0.435786	0.24	5.79695	6.09229	11.5939	8.18155
272	151.603	1	2.97947	617.521	8.56681	0.114245	122.197	0.242798	8.92337	0.896424	0.86	0.852494	3.13016	1.70499	4.26927
273	72.7982	1	0.0005047	500.593	15.3554	0.33629	40.6592	0.141753	29.0812	0.900781	0.81	1.19636	3.61268	2.39273	5.10913
274	9.16796	1	0.00138919	7730.26	23.1588	0.292416	45.1612	0.0011831	5.17463	0.75298	0.68	2.14413	4.6195	4.28826	6.64544
275	578.93	1	0	1223.18	31.9791	0.515503	124.175	0.466977	12.3525	0.286913	0.11	7.70753	5.66995	15.4151	7.76336
276	457.232	1	0	903.767	34.7853	0.767224	83.8858	0.494106	40.5594	0.277151	0.19	6.59056	5.96229	13.1811	8.28935
277	192.223	1	0.00497023	362.293	17.8639	0.3375	48.0234	0.510767	24.3989	0.801115	0.7	1.90753	4.41252	3.81506	6.12396
278	680.839	1	0	1098.45	34.9149	0.686934	126.626	0.609272	30.311	0.307721	0.1	7.95297	5.66736	15.9059	7.83137
279	18.2914	1	0.000641714	5778.25	22.773	0.753987	56.295	0.00315593	6.75599	0.784249	0.59	2.56386	4.93067	5.12771	6.39173
280	182.368	1	0	495.709	31.4587	0.395996	25.21	0.352225	18.3088	0.57744	0.39	4.70303	5.9384	9.40606	8.68491
281	381.162	1	0	862.703	31.6256	0.510817	90.3775	0.430883	45.916	0.556243	0.35	4.8607	5.87504	9.7214	8.40115
282	221.504	1	0	1410.2	28.5497	0.745231	95.6887	0.154906	18.0537	0.59462	0.39	4.41007	5.79392	8.82013	8.11394
283	211.32	1	0.0102207	1787.84	23.7766	0.908516	117.156	0.117214	5.21763	0.564823	0.37	4.37876	5.7578	8.75753	7.67162
284	146.433	1	0.47229	460.028	11.743	0.0515221	79.8266	0.311648	23.8955	0.883327	0.84	0.991941	3.38065	1.98388	4.58097
285	401.953	1	0	1041.39	30.4793	0.493892	99.5107	0.379002	14.0118	0.50092	0.28	5.6582	6.07047	11.3164	8.68077
286	420.764	1	0	855.64	33.8652	1.04928	43.6704	0.485187	18.9769	0.0224288	0.01	11.1425	3.09477	22.2849	4.54044
287	657.863	1	0	973.183	35.9643	0.444524	104.627	0.662693	31.9443	0.233159	0.09	8.21744	5.65156	16.4349	7.90246
288	161.092	1	0.000530294	806.552	15.8059	0.566033	102.774	0.196706	17.107	0.854071	0.72	1.70545	4.17965	3.41091	5.70469
289	262.75	1	0	1835.77	35.3335	0.671267	68.6064	0.141873	7.8077	0.151985	0.04	9.54659	4.94981	19.0932	6.93239
290	230.863	1	0.0138401	340.002	15.8544	0.66858	47.3472	0.656845	7.85371	0.816247	0.66	2.19186	4.71278	4.38372	6.35526
291	365.927	1	0	1184.54	34.2901	0.451814	94.7118	0.303292	30.5899	0.446665	0.24	6.15506	6.02144	12.3101	8.58459
292	311.809	1	0	2474.87	36.823	0.519889	117.016	0.125036	31.5251	0.256793	0.03	8.96538	5.33996	17.9308	6.87535
293	153.025	1	0.021766	1186.82	19.8533	0.344074	135.571	0.127196	28.4045	0.826265	0.75	1.80208	4.31792	3.60416	6.75559
294	264.553	1	1.54875	389.911	9.79191	0.100668	109.4	0.663387	45.2678	0.942337	0.87	0.772141	2.94391	1.54428	4.02695
295	358.465	1	0	1062.08	32.2101	0.312521	111.278	0.330348	47.4286	0.526285	0.41	4.58724	5.85722	9.17449	8.79787
296	330.833	1	0	674.557	35.9909	0.70837	28.2747	0.479893	15.2407	0.0661527	0.01	10.5794	4.21385	21.1589	5.83325
297	275.924	1	0	789.36	36.3306	0.395952	35.0763	0.341029	17.5699	0.22872	0.08	8.29859	5.56554	16.5972	7.67294
298	385.071	1	0	1408.76	37.7214	0.880047	85.06	0.26942	36.9942	0.228027	0.07	8.61104	5.4633	17.2221	7.53656
299	336.618	1	0	2207.09	38.6042	0.490972	138.57	0.150871	42.7354	0.347417	0.18	7.26532	5.98987	14.5306	8.73944
300	92.1954	1	1.00131	396.057	10.4079	0.043295	41.6196	0.227027	21.3738	0.952525	0.87	0.778732	2.97387	1.55746	4.06841
301	366.231	1	0	1296.05	33.8616	0.42194	92.5867	0.278273	22.913	0.355981	0.15	6.91585	5.89764	13.8317	8.01669
302	178.312	1	0	356.978	30.1965	0.667399	20.8411	0.470109	42.979	0.627252	0.45	3.93765	5.65867	7.8753	8.02881
303	784.647	1	0	1175.27	34.3448	1.04726	117.357	0.660299	16.6962	0.0416406	0.01	10.6459	4.04392	21.2917	5.7799
304	206.951	1	0	654.773	39.5201	0.428646	21.5402	0.3054	33.0788	0.207385	0.09	8.32681	5.59698	16.6536	7.94001
305	421.814	1	0	1371.26	33.0832	0.548362	123.774	0.303086	42.253	0.414119	0.18	6.30744	5.99904	12.6149	7.7834
306	119.934	1	0	3547.82	33.7398	0.458835	130.517	0.0335696	46.4637	0.548496	0.4	4.43485	5.78025	8.86969	8.42757
307	129.984	1	0	2118.53	39.026	0.366904	58.0249	0.0606067	39.899	0.505026	0.23	6.42174	6.03873	12.8435	8.74255
308	207.246	1	0.0227643	1020.43	22.7317	0.487561	75.2786	0.200124	6.05682	0.652941	0.45	3.78508	5.56664	7.57016	7.69522
309	410.746	1	0	1063.24	30.5335	0.781922	115.55	0.379052	40.7076	0.507555	0.31	5.08006	6.0293	10.1601	7.98004
310	255.636	1	0.0221482	391.775	12.7889	0.158424	117.385	0.635423	48.7809	0.86006	0.81	1.12777	3.49772	2.25555	4.69279
311	346.777	1	0	944.405	36.5084	0.84764	40.8643	0.36149	37.8755	0.0210214	0.01	10.808	3.73095	21.6161	5.25136
312	231.115	1	0	907.284	34.3645	0.60489	44.0593	0.248802	14.6096	0.413268	0.23	6.36766	5.99698	12.7353	8.73643
313	344.853	1	0	830.006	34.4922	0.546209	53.7059	0.405593	20.193	0.344038	0.15	7.12702	5.88585	14.254	8.13169
314	271.416	1	0	1212.49	32.3307	0.450818	76.1998	0.220094	18.2711	0.481268	0.25	5.8168	5.99397	11.6336	8.40149
315	236.381	1	0	1793.96	32.8215	0.473106	126.541	0.130043	29.731	0.605562	0.43	4.53059	5.84548	9.06119	9.16016
316	189.239	1	0.00582485	899.804	23.7051	0.595173	70.9529	0.206353	13.0624	0.65847	0.54	3.22216	5.3358	6.44433	7.65655
317	60.0162	1	0	7892.75	41.4752	0.344004	94.8611	0.00757724	41.8821	0.405635	0.19	6.81643	5.92406	13.6329	8.56285
318	160.551	1	0	2183.45	25.9613	0.704882	122.031	0.0729245	16.3377	0.604769	0.42	3.9027	5.60785	7.8054	7.36408
319	159.234	1	0	1716.59	34.7668	0.483458	65.169	0.0915129	36.7213	0.464889	0.25	5.66828	5.95733	11.3366	8.17057
320	540.792	1	0	881.169	35.0888	0.362637	108.896	0.597839	48.4901	0.452211	0.29	5.83936	6.08447	11.6787	9.11194
321	349.556	1	0	545.397	27.0114	0.443304	53.0185	0.621033	8.83888	0.553288	0.38	4.77299	5.95901	9.54599	8.67129
322	450.402	1	0	974.799	36.031	0.612729	58.9713	0.454602	24.967	0.0675702	0.01	10.0346	4.56771	20.0691	6.17094
323	351.377	1	0	1189.69	34.6269	0.460423	81.8518	0.290258	22.7874	0.357774	0.17	6.87546	6.03782	13.7509	8.31751
324	266.713	1	0	975.654	29.9949	0.775424	67.8436	0.267959	22.8419	0.536274	0.29	5.15025	5.98081	10.3005	7.85584
325	428.304	1	0	916.596	37.7582	0.570406	58.5973	0.4574	39.2181	0.213286	0.05	8.98362	5.289	17.9672	7.27503
326	389.708	1	0.000713158	576.816	25.0093	0.865748	71.2107	0.656714	20.9465	0.660155	0.38	4.20235	5.76472	8.4047	7.33451
327	707.142	1	0	1461.69	36.8525	0.864692	136.151	0.478453	30.6529	0.0769758	0.03	10.2851	4.34457	20.5702	6.49312
328	77.2982	1	0	4144.69	41.1728	0.50703	58.3332	0.0185327	35.6294	0.369921	0.13	7.47625	5.9304	14.9525	8.29872
329	401.115	1	0.0162722	598.424	21.9338	0.767968	125.069	0.651931	43.4929	0.726467	0.63	2.5427	4.96639	5.0854	7.20295
330	82.6022	1	0	8785.03	37.6992	0.657638	99.0577	0.00938375	6.71092	0.119154	0.03	10.015	4.46452	20.03	6.5191
331	328.222	1	0	1147.6	38.9546	0.513548	54.811	0.280997	39.9805	0.141263	0.06	9.24902	5.07656	18.498	7.24998
332	262.218	1	0	1165.46	39.3666	0.737871	44.6822	0.221016	30.6636	0.15444	0.07	9.20371	5.05149	18.4074	7.46688
333	409.318	1	0	2318.27	39.8983	0.791764	133.369	0.175008	46.7461	0.174338	0.07	9.66073	4.70099	19.3215	7.3174
334	87.6908	1	0.00552675	3544.66	24.0481	0.584936	139.018	0.0246142	10.1914	0.696717	0.55	3.04625	5.24062	6.09249	7.41094
335	489.894	1	0	1278.26	37.1897	0.450107	110.275	0.376797	48.2218	0.29789	0.13	7.64796	5.74931	15.2959	8.1405
336	59.3559	1	0	2260.55	34.926	0.587894	41.1591	0.0259576	45.1867	0.52317	0.4	4.41473	5.7518	8.82946	8.27472
337	469.502	1	0	963.175	35.8675	0.835343	58.2136	0.480022	33.6733	0.0283231	0.02	10.4791	3.90144	20.9582	5.54577
338	572.152	1	0	960.305	33.8589	0.576793	71.8819	0.587723	20.3653	0.0739506	0	10.3288	4.14117	20.6576	5.41118
339	267.608	1	0	1069.13	26.2976	0.594601	105.141	0.24594	29.0345	0.716012	0.47	3.66262	5.50887	7.32524	7.68418
340	166.132	1	0	3016.61	39.1117	0.39427	98.5833	0.0546146	35.1402	0.369709	0.19	6.90588	6.06564	13.8118	8.72117
341	89.3383	1	0	2177.44	26.8141	0.46524	82.8463	0.0406474	26.2713	0.675112	0.53	3.18662	5.34653	6.37324	7.40806
342	62.0273	1	0	3573.48	40.4106	0.6003	31.5762	0.0172549	35.8636	0.161238	0.02	9.55897	4.87873	19.1179	6.46287
343	306.602	1	0.000299093	937.267	25.241	0.542094	115.454	0.320773	38.5183	0.67396	0.51	3.3431	5.39982	6.6862	7.45331
344	354.629	1	0	1400.67	33.8732	0.349248	124.262	0.249079	45.0134	0.524723	0.31	5.38696	6.06809	10.7739	8.69368
345	152.519	1	3.36361	647.589	7.4681	0.0646185	129.717	0.233059	47.9892	0.965769	0.92	0.460288	2.26673	0.920576	3.14643
346	166.215	1	0.0387861	884.014	18.3958	0.257421	89.19	0.185097	9.35792	0.79293	0.68	2.21267	4.67644	4.42533	6.91338
347	281.907	1	0	2399.05	37.4653	0.740282	96.6602	0.116611	29.9499	0.108545	0.03	9.51151	4.87265	19.023	6.6261
348	191.073	1	0	4561.27	39.7938	0.491569	137.091	0.0416851	42.4063	0.189829	0.07	8.66603	5.48831	17.3321	7.52464
349	481.271	1	0	797.937	32.3777	0.412907	78.4043	0.588919	22.4254	0.405074	0.18	6.55133	5.99166	13.1027	8.1142
350	265.617	1	0.632527	435.714	11.4122	0.158317	104.695	0.597764	11.0607	0.814529	0.77	1.3919	3.87933	2.7838	5.13191
351	227.007	1	0.602921	324.307	11.478	0.157985	88.4399	0.678802	44.3504	0.896375	0.87	0.850876	3.11617	1.70175	4.55802
352	131.827	1	0	3078.22	36.9659	0.590282	59.7617	0.0425703	8.14631	0.132131	0.05	9.24612	5.13492	18.4922	7.12626
353	237.665	1	0	1619	37.5748	0.555406	57.4902	0.145055	17.6468	0.192675	0.06	9.05957	5.32871	18.1191	7.34174
354	300.26	1	0	430.46	34.8491	0.435587	24.124	0.665309	22.1793	0.371777	0.16	7.0003	5.9159	14.0006	8.10552
355	367.4	1	0	689.842	26.3	0.700156	91.3158	0.518384	48.6984	0.682235	0.45	3.70069	5.56803	7.40137	7.42064
356	284.223	1	0	1141.64	33.7286	0.518883	82.7432	0.244002	44.2412	0.559875	0.31	5.265	6.06444	10.53	8.53283
357	171.42	1	0.00339932	678.868	16.7997	0.316227	100.319	0.247518	31.9386	0.845463	0.76	1.55596	4.04634	3.11193	5.81246
358	192.662	1	6.39602	282.941	5.58105	0.02471	38.3905	0.669118	24.1341	0.951502	0.94	0.38116	2.17698	0.76232	3.03856
359	383.303	1	0	735.411	30.8121	0.972132	74.6556	0.506905	36.8693	0.548511	0.32	5.03039	5.95628	10.0608	8.1625
360	247.699	1	0	2632.85	34.3326	0.716773	90.5547	0.0935573	6.78892	0.123019	0.03	9.81064	4.54936	19.6213	6.33724
361	146.818	1	0.188887	338.629	12.0055	0.146606	71.2486	0.420685	47.0964	0.909834	0.87	0.824587	3.0306	1.64917	4.45535
362	334.812	1	0	629.937	35.1572	0.789846	26.9156	0.519815	13.31	0.102022	0.01	10.4982	4.1039	20.9965	5.69127
363	105.089	1	1.11725	773.431	10.2446	0.0298086	114.677	0.134174	46.8853	0.92908	0.89	0.659623	2.75073	1.31925	3.78555
364	242.598	1	0.0780135	413.755	16.4214	0.249626	56.7761	0.570146	5.28118	0.804509	0.67	2.338	4.78433	4.676	7.23888
365	286.583	1	0	1470.1	31.2902	0.394595	92.2836	0.192462	8.75273	0.463102	0.24	6.17432	6.05837	12.3486	8.65802
366	410.24	1	0.00101678	1291.69	26.6249	0.534567	117.924	0.314087	5.67002	0.482624	0.2	6.0872	6.08096	12.1744	7.81384
367	35.3111	1	0	6336.82	41.3061	0.632193	47.729	0.0055474	49.8594	0.364296	0.21	6.39333	6.01929	12.7867	8.31545
368	152.369	1	0.00140107	496.572	15.1224	0.211329	85.1166	0.299162	38.7176	0.916966	0.82	1.18647	3.58501	2.37294	5.3763
369	27.0188	1	0	3846.93	24.665	0.474375	53.0219	0.00698838	10.0469	0.727459	0.6	2.67194	4.99093	5.34389	6.9577
370	129.392	1	0	1168.51	33.0396	0.463219	45.7483	0.108489	25.5688	0.587709	0.43	4.4356	5.90015	8.87121	8.81728
371	518.821	1	0	1575.19	37.3155	0.548083	131.471	0.325138	24.0798	0.251961	0.12	8.40584	5.46071	16.8117	8.33233
372	131.562	1	0	794.457	30.1411	0.848147	25.0179	0.16174	11.7156	0.435721	0.22	5.58964	6.00245	11.1793	7.43406
373	279.815	1	0	714.798	27.1262	0.482559	65.3532	0.381346	17.9332	0.57693	0.44	4.0841	5.7441	8.1682	8.17498
374	377.314	1	0	877.584	31.7788	1.15814	40.3562	0.425322	5.02469	0.0217911	0	11.1189	3.23931	22.2378	4.5648
375	201.49	1	0	328.492	28.8642	0.543036	20.8769	0.577029	22.0625	0.592473	0.44	4.08564	5.73987	8.17127	8.19055
376	177.233	1	0.00479608	622.588	17.8072	0.262053	103.707	0.277989	47.2707	0.883666	0.8	1.4202	3.96067	2.84041	6.09885
377	441.563	1	0.00318018	631.759	25.6015	0.453046	118.029	0.678196	44.6214	0.725808	0.57	3.13778	5.33754	6.27557	8.08023
378	98.4776	1	0	967.624	27.3789	0.420371	42.0004	0.0995808	44.7164	0.738905	0.55	3.04098	5.23789	6.08195	7.37548
379	200.81	1	0	1181.75	38.5195	0.31115	46.3442	0.166436	29.3523	0.344981	0.2	6.87041	5.98651	13.7408	8.89553
380	409.191	1	0	1570.03	37.0389	0.621165	92.7391	0.257626	20.917	0.147176	0.05	9.38042	5.00011	18.7608	7.21481
381	122.613	1	0.00215456	576.595	24.1447	0.469481	33.0808	0.206046	22.5108	0.754138	0.58	2.8325	5.14205	5.66501	7.19434
382	511.238	1	0	783.378	29.2521	0.583956	123.993	0.635862	43.9062	0.603993	0.43	4.31105	5.85609	8.62211	8.43202
383	350.628	1	0	997.566	32.43	0.316031	79.6397	0.344358	23.63	0.46429	0.24	5.89442	5.95397	11.7888	8.35697
384	367.915	1	0	873.174	33.2406	0.691427	38.8505	0.416176	18.36	0.0256254	0	11.1882	3.03382	22.3763	4.20027
385	73.5431	1	0	660.369	13.7047	0.0940231	67.3002	0.109418	46.8869	0.846382	0.84	0.971229	3.30837	1.94246	4.48281
386	255.53	1	0	849.915	35.1055	0.542917	40.4011	0.293496	42.7651	0.40409	0.1	7.18848	5.82543	14.377	7.28688
387	538.781	1	0	914.409	35.1834	0.52857	90.0689	0.576276	23.2927	0.3726	0.16	7.32848	5.98196	14.657	8.59371
388	456.451	1	0	719.996	36.029	0.486787	57.8796	0.61607	23.4785	0.326244	0.14	7.55862	5.80209	15.1172	8.48298
390	118.909	1	0	712.592	33.9275	0.44911	24.332	0.161277	35.872	0.621132	0.38	4.61057	5.81765	9.22114	8.53802
391	97.888	1	0.574449	871.675	10.9585	0.238951	110.513	0.111157	8.20418	0.903423	0.84	1.0041	3.31476	2.00819	4.84046
392	380.902	1	0	871.839	29.5166	0.368514	112.832	0.426309	38.992	0.647753	0.49	3.93408	5.58312	7.86816	8.74237
393	177.353	1	0.0314711	762.832	20.5376	0.571218	79.5914	0.227715	15.4396	0.78549	0.68	2.26683	4.71622	4.53365	7.24591
394	393.228	1	0	784.098	37.5031	0.5494	45.1339	0.489496	33.9954	0.142672	0.05	9.13406	5.22378	18.2681	7.10353
395	265.853	1	0	834.436	29.4035	0.233756	71.9721	0.31072	19.5039	0.63525	0.47	4.11783	5.66066	8.23566	8.92381
396	231.614	1	0	2004.65	37.873	0.419269	78.031	0.114298	15.9409	0.292527	0.12	8.06356	5.7275	16.1271	8.41573
397	58.8592	1	0.00303171	1146.14	19.0153	0.323278	55.9113	0.0506576	25.3743	0.846746	0.75	1.62818	4.14541	3.25636	5.91346
398	396.813	1	0	674.028	36.0699	0.342693	51.4151	0.569887	42.681	0.432125	0.17	6.89812	5.93877	13.7962	8.28069
399	798.833	1	0	1243.71	32.8014	1.03926	122.874	0.636747	12.9342	0.0424162	0.01	10.9806	3.41323	21.9612	5.01201
400	595.149	1	0	1068.51	33.5438	0.859835	85.2172	0.550116	14.9553	0.15123	0.01	10.0963	4.27918	20.1926	5.79967
401	196.275	1	0.00694267	289.512	20.6812	0.526005	31.8586	0.642275	28.9027	0.744804	0.65	2.30028	4.77657	4.60055	6.63227
402	656.527	1	0	1147.67	35.4052	0.465353	113.74	0.563447	25.8099	0.211769	0.05	8.93817	5.17541	17.8763	7.23198
403	496.712	1	0	792.383	35.5539	0.473325	67.2678	0.611489	36.5861	0.319025	0.1	7.8186	5.81816	15.6372	7.65582
404	244.802	1	0	984.407	27.5421	0.68447	89.379	0.243654	41.1287	0.626163	0.48	3.6188	5.56787	7.23759	7.75409
405	275.13	1	0	1043.77	36.1861	0.374058	51.987	0.258308	20.5479	0.372243	0.14	7.41532	5.88839	14.8306	8.25653
406	306.514	1	0	1378.18	34.3437	0.537025	71.8387	0.219466	7.70745	0.22559	0.13	7.9488	5.59886	15.8976	8.34376
407	221.352	1	0	517.323	36.4303	0.462839	21.5599	0.410057	22.809	0.346445	0.17	6.97266	5.94053	13.9453	8.38227
408	502.759	1	0	1528.82	34.5821	0.544914	128.617	0.324943	9.92615	0.223786	0.14	8.08908	5.63447	16.1782	8.67603
409	497.197	1	0	873.593	34.7133	0.555198	74.0601	0.557034	15.1757	0.185739	0.12	7.86307	5.84211	15.7261	8.31148
410	287.286	1	0	1402.84	29.599	0.64731	103.552	0.202041	17.6218	0.588739	0.28	5.25984	6.0015	10.5197	7.97621
411	309.067	1	0	1437.48	36.0907	0.600588	66.042	0.212363	19.4593	0.181486	0.04	9.1021	5.20662	18.2042	6.89122
412	377.174	1	0	781.161	32.6131	0.561379	61.1595	0.470937	17.3918	0.383829	0.21	6.43661	6.05069	12.8732	8.34501
413	621.138	1	0	959.18	31.5904	0.392725	123.196	0.635258	14.8716	0.459052	0.22	6.49876	6.07326	12.9975	8.79664
414	233.102	1	0	417.144	26.3113	0.568452	25.5291	0.537831	6.18571	0.542683	0.31	5.0218	5.90444	10.0436	7.90402
415	393.446	1	0	680.747	34.6996	0.515	50.9603	0.560886	28.8597	0.332225	0.16	6.98701	6.0002	13.974	8.08629
416	134.021	1	0	2673.35	36.5211	0.965165	45.8928	0.0498477	13.3746	0.0408237	0.01	10.6338	3.88197	21.2676	5.45062
417	91.8363	1	0.0029785	1280.57	17.1548	0.368919	103.491	0.0709356	22.5019	0.855084	0.76	1.53872	4.00074	3.07745	5.75116
418	216.916	1	0	825.537	33.7352	0.567537	29.7247	0.257281	5.38165	0.323267	0.1	8.08054	5.75084	16.1611	7.93427
419	176.617	1	0	991.424	37.2454	0.557005	30.7481	0.174281	22.2425	0.306147	0.12	7.63181	5.79576	15.2636	7.93096
420	155.45	1	0.0229011	836.441	17.0034	0.447029	97.5905	0.182912	12.2905	0.854976	0.74	1.79115	4.28884	3.58229	6.47118
421	478.409	1	0	1149.62	38.066	0.444387	80.4002	0.409156	30.3933	0.158811	0.06	9.21332	5.12789	18.4266	7.54091
422	85.6193	1	1.18593	611.429	10.6056	0.166689	80.8527	0.137868	26.905	0.931576	0.91	0.626643	2.74636	1.25329	4.23985
423	483.589	1	0.0443531	827.727	22.0955	0.664323	138.889	0.574274	10.4657	0.661696	0.44	3.86772	5.61929	7.73544	7.76316
424	515.404	1	0	1108.6	37.972	0.471334	88.1348	0.456461	29.2919	0.236464	0.08	8.71931	5.4729	17.4386	8.06087
425	25.0203	1	0.00217231	5658.21	21.5979	0.206311	126.281	0.00440751	40.2968	0.890475	0.78	1.52964	4.07289	3.05929	6.05932
426	514.128	1	0	749.775	35.1438	1.09235	48.1904	0.673475	36.1691	0.019323	0	10.7622	3.73449	21.5244	5.05973
427	224.949	1	0	652.897	38.6078	0.563035	23.8266	0.333172	27.2578	0.289406	0.1	8.16531	5.68278	16.3306	7.99945
428	549.185	1	0	1063.18	33.4586	0.330286	103.488	0.507827	10.9886	0.390753	0.15	7.59831	5.89732	15.1966	8.68221
429	587.895	1	0	1047.26	34.6037	0.376105	90.4501	0.552792	14.4045	0.197064	0.05	9.18206	5.11305	18.3641	7.19397
430	336.2	1	0.0112475	648.576	18.6237	0.433112	129.876	0.507311	27.602	0.812723	0.65	2.24548	4.6645	4.49095	6.47615
431	254.329	1	0	684.447	35.4833	0.677677	30.8373	0.360794	13.0098	0.33294	0.13	7.50828	5.9526	15.0166	8.3162
432	174.562	1	9.13609	256.077	2.3906	0.00167482	119.998	0.675952	44.2816	0.977211	0.98	0.115764	1.15478	0.231528	1.62894
433	216.159	1	0	487.941	27.9868	0.820485	36.0811	0.425309	28.7116	0.654148	0.46	3.84448	5.59035	7.68896	7.91175
434	394.439	1	0	1243.37	30.0235	0.491189	87.5299	0.313488	5.11944	0.223415	0.11	7.58482	5.70395	15.1696	7.74103
435	450.493	1	0	2122.36	36.5502	0.56633	135.993	0.21053	38.8443	0.107286	0.02	9.55241	4.80806	19.1048	6.42209
436	126.153	1	0.0346152	279.022	13.3905	0.196934	36.5876	0.435144	15.2949	0.893568	0.8	1.2503	3.67437	2.5006	5.15913
437	95.6653	1	0	816.157	14.0089	0.0685007	88.8933	0.115567	28.8726	0.899639	0.8	1.18628	3.58051	2.37257	4.78818
438	395.513	1	0	2124.75	40.5535	0.558557	124.639	0.184215	31.5533	0.21875	0.1	9.14038	5.29758	18.2808	8.32115
439	301.757	1	0	935.069	39.7591	0.321799	46.6006	0.314773	30.2319	0.220658	0.14	8.09042	5.69477	16.1808	8.67905
440	422.39	1	0	1091.76	27.5971	0.421411	126.373	0.380697	13.3404	0.573723	0.35	4.91876	5.95172	9.83751	8.40986
441	487.455	1	0	1025.6	30.5884	0.594902	116.052	0.466643	24.5677	0.472325	0.24	5.79379	5.97802	11.5876	8.06145
443	433.024	1	0	1799.61	36.6223	1.00856	96.5538	0.238673	45.3492	0.0287642	0.01	10.9665	3.5739	21.9329	5.20031
444	253.319	1	0.000715641	990.781	25.1514	0.485444	108.46	0.250883	26.7261	0.757068	0.57	3.10998	5.28492	6.21996	7.88749
445	129.747	1	0	6862.03	37.0068	0.685596	124.03	0.0188602	6.94809	0.15193	0.03	9.80843	4.84856	19.6169	6.78752
446	40.2462	1	0.00212873	1475.43	22.261	0.596013	33.4691	0.0269586	12.4718	0.821447	0.63	2.40007	4.9077	4.80013	6.50627
447	42.0393	1	0	6790.53	41.6777	0.818478	37.3534	0.00617197	28.0445	0.0524311	0.03	10.4371	4.06071	20.8741	6.19489
448	348.6	1	0.0568148	576.019	18.7158	0.576711	83.41	0.592552	5.71502	0.741844	0.53	3.21642	5.39496	6.43284	7.50583
449	574.52	1	0	829.071	30.5448	0.222508	126.908	0.676238	42.7902	0.484668	0.33	5.01732	5.88458	10.0346	8.37351
450	169.963	1	0	2885.58	32.7904	0.531373	124.928	0.0584526	13.3452	0.570943	0.33	5.33688	5.9517	10.6738	8.90218
451	144.339	1	0.00146838	238.65	15.4446	0.256412	33.0512	0.574168	36.8385	0.842639	0.78	1.35313	3.77832	2.70627	5.24021
452	298.501	1	0	1152.99	34.6001	0.498925	81.3838	0.253777	30.5864	0.431039	0.3	5.67863	6.0773	11.3573	8.92794
453	673.764	1	0	1004.11	35.8143	0.529275	122.949	0.657229	43.0069	0.335369	0.15	7.38297	5.8448	14.7659	8.31771
454	362.566	1	0	964.051	26.4411	0.434357	134.389	0.368646	40.7487	0.713316	0.51	3.49238	5.50348	6.98476	7.89158
455	121.802	1	0.000857572	771.889	14.2454	0.24063	96.2121	0.155459	17.8216	0.858597	0.79	1.31857	3.77358	2.63714	5.28235
456	93.9542	1	3.39178	678.395	7.66943	0.0474634	124.937	0.137153	11.4286	0.921423	0.92	0.528236	2.44761	1.05647	3.83266
457	356.659	1	0	1105.54	34.0131	0.327491	71.6656	0.317103	14.3879	0.25818	0.13	7.40832	5.85394	14.8166	8.11631
458	192.257	1	2.969	536.458	8.72227	0.0806168	125.917	0.353416	27.2686	0.972521	0.89	0.673889	2.81011	1.34778	3.86727
459	59.402	1	4.1884	815.582	7.6527	0.0349103	80.2547	0.0722396	12.1788	0.952897	0.92	0.50154	2.47408	1.00308	3.43451
460	514.659	1	0	739.003	27.8584	0.822302	119.454	0.678646	49.8449	0.668563	0.4	4.25024	5.83864	8.50048	7.7913
461	293.934	1	0.00628737	782.963	23.1072	0.64175	104.261	0.367341	37.1739	0.744017	0.55	2.95212	5.20975	5.90424	7.02705
462	32.6874	1	0	6092.39	30.087	0.446969	86.3141	0.00534441	31.6024	0.711715	0.55	3.14826	5.27552	6.29653	7.61905
463	658.822	1	0	963.942	33.0076	0.445923	109.661	0.671333	12.2445	0.293319	0.14	7.79225	5.71938	15.5845	8.36057
464	169.818	1	0	571.128	38.6453	0.534448	18.5735	0.284899	31.277	0.382428	0.19	6.85395	6.1326	13.7079	8.70161
465	530.008	1	0	988.087	37.7791	0.584765	77.8944	0.525902	46.5852	0.181807	0.05	9.02954	5.29346	18.0591	7.28212
466	280.632	1	0	956.785	37.6099	0.421367	44.4904	0.286879	36.2688	0.278218	0.08	8.08609	5.74292	16.1722	7.65946
467	151.497	1	5.75178	368.241	5.40532	0.0288154	74.5604	0.406137	24.1178	0.982204	0.94	0.353877	2.02198	0.707753	2.82226
468	381.972	1	0	1815.49	37.6687	0.710569	92.9672	0.208396	35.4971	0.101042	0.03	10.121	4.34657	20.242	6.31277
469	174.271	1	0.00262102	558.904	25.1227	0.607753	36.2265	0.302084	12.3459	0.722286	0.49	3.56504	5.54712	7.13008	7.79697
470	198.867	1	0	908.156	34.5996	0.660313	40.451	0.213647	33.3584	0.458754	0.23	5.96714	6.07966	11.9343	8.13628
471	86.9908	1	0.000210226	784.214	14.2327	0.208886	89.0692	0.109233	34.5794	0.895316	0.84	1.03308	3.40442	2.06617	4.90593
472	148.578	1	0.00062359	665.943	24.7022	0.373326	50.2672	0.216772	48.2458	0.771004	0.61	2.61825	4.96181	5.2365	7.12055
473	289.029	1	0	2763.34	36.32	0.813482	129.451	0.10386	13.8806	0.225378	0.1	8.39241	5.5072	16.7848	7.90798
474	483.29	1	0	903.127	37.6712	0.460576	63.3862	0.523991	47.1441	0.191238	0.04	9.23643	5.06788	18.4729	6.98057
475	302.259	1	0	1001.24	30.8275	0.293381	90.1473	0.295443	28.0131	0.615788	0.41	4.50067	5.85965	9.00134	8.77353
476	243.789	1	0	1850.22	36.4001	0.602024	68.3802	0.130457	16.2348	0.208654	0.04	8.94666	5.31148	17.8933	7.09599
477	134.269	1	0.00797192	625.156	13.3462	0.270539	90.8055	0.211109	16.6278	0.94522	0.8	1.24284	3.65142	2.48568	5.15096
478	397.851	1	0	1635.33	39.5457	0.527745	99.5715	0.240073	41.2082	0.249474	0.08	8.83272	5.38326	17.6654	7.94859
479	107.908	1	8.17025	424.359	3.53463	0.0249822	131.562	0.252391	26.0777	0.985143	0.97	0.180675	1.46846	0.36135	2.06605
480	102.781	1	0.223338	267.182	11.6708	0.199957	37.8341	0.370524	28.7003	0.94513	0.87	0.820058	3.002	1.64012	4.41367
481	118.857	1	0	5254.05	38.6164	0.674911	90.7899	0.0225369	20.4158	0.156181	0.04	9.3869	5.07899	18.7738	6.77136
482	382.993	1	0.00340913	850.661	24.2464	0.543471	128.717	0.441176	32.6282	0.683679	0.5	3.39463	5.48697	6.78926	7.41552
483	456.712	1	0	1174.53	29.2774	0.495197	108.258	0.383658	6.89048	0.394004	0.18	6.69719	6.05169	13.3944	8.22606
484	302.52	1	0	438.819	34.7861	0.476455	30.3506	0.654482	34.3036	0.475643	0.29	5.68824	6.1005	11.3765	8.83602
485	414.484	1	0	703.626	34.3497	0.290367	57.2428	0.572162	46.1604	0.428372	0.14	6.77888	6.07099	13.5578	7.71648
486	303.988	1	0.0482669	1012.09	21.8907	0.501683	108.945	0.296178	6.00862	0.586332	0.47	3.80458	5.65652	7.60915	7.9339
487	158.294	1	0	1900.73	35.3403	0.397792	66.1885	0.0822833	19.1138	0.481825	0.24	6.15246	6.07988	12.3049	8.58434
488	49.0214	1	0.00422949	2810.3	20.2255	0.398233	122.326	0.0173376	32.0703	0.835011	0.78	1.5317	4.08446	3.0634	6.17331
489	445.233	1	0	799.251	37.5253	0.713389	50.5887	0.544331	23.8274	0.166844	0.06	9.41571	4.94073	18.8314	7.31725
490	337.116	1	0	2599.46	37.4408	0.751849	116.91	0.128842	18.9735	0.0936454	0.04	10.2012	4.31032	20.4024	6.56791
491	90.7668	1	0	788.484	32.3862	0.787263	22.9069	0.111704	46.5364	0.635372	0.41	4.15303	5.76131	8.30606	7.96382
492	151.038	1	0.0437931	380.143	13.1219	0.119618	79.5872	0.385907	36.697	0.880919	0.86	0.940868	3.21576	1.88174	4.95424
493	635.854	1	0	944.739	34.1493	0.887204	77.8085	0.66371	16.7702	0.0620172	0.01	10.4292	4.15534	20.8585	5.6967
494	372.711	1	0	749.781	39.0608	0.618634	41.3333	0.483523	43.4653	0.222418	0.07	9.00872	5.27545	18.0174	7.50919
495	246.296	1	0.0522376	550.838	15.6584	0.302039	89.3532	0.437909	6.4275	0.81592	0.72	2.02941	4.6003	4.05882	7.07962
496	197.645	1	0	2018.13	39.5232	0.578691	67.9395	0.0968014	47.5587	0.28715	0.1	7.94941	5.70518	15.8988	7.91311
497	83.0311	1	8.91261	435.004	2.88417	0.0111459	108.136	0.189715	34.6372	0.966623	0.98	0.117981	1.17684	0.235962	1.66006
498	234.146	1	0	1835.77	39.6079	0.482268	65.8457	0.126041	32.5368	0.225435	0.07	8.83686	5.38767	17.6737	7.70357
499	487.029	1	0	929.384	31.5847	0.459691	94.5252	0.513685	16.8757	0.482208	0.2	6.43008	6.10697	12.8602	8.30203
500	193.694	1	0.00149209	308.55	25.0116	0.374794	27.6219	0.590537	39.5339	0.755105	0.6	2.78224	5.12216	5.56449	7.45346
501	309.928	1	0.00102679	793.024	25.1384	0.883605	82.3835	0.38255	26.3103	0.693366	0.4	3.99904	5.79921	7.99807	7.10177
502	176.395	1	6.09211	367.493	5.33809	0.0868149	102.495	0.474799	5.025	0.924067	0.89	0.659921	2.74993	1.31984	3.78429
503	613.474	1	0	1145.11	34.6653	0.547967	92.4611	0.529215	13.3241	0.0914103	0.02	10.2813	4.50888	20.5625	6.25869
504	258.456	1	0	1483.25	38.6748	1.34374	48.5172	0.172243	48.0856	0.0761681	0.02	10.6992	3.78239	21.3985	5.76335
505	524.248	1	0	1204.83	36.2321	0.614444	101.501	0.428207	19.9924	0.316258	0.1	8.38905	5.6997	16.7781	8.14026
506	86.6238	1	0.00261587	419.979	16.4641	0.248563	37.2875	0.199657	41.9614	0.877675	0.8	1.28996	3.79209	2.57992	5.27516
507	434.729	1	0	1391.92	36.906	0.442281	96.5254	0.307903	18.7111	0.308086	0.1	8.46607	5.61258	16.9321	8.19734
508	624.426	1	0	1264.69	35.0558	1.01346	98.5933	0.488584	38.8348	0.0281579	0	10.8577	3.74173	21.7155	5.03252
509	282.41	1	0	1001.79	38.9841	0.408718	47.6694	0.275553	38.5045	0.279879	0.13	7.94694	5.65386	15.8939	8.21509
510	190.018	1	0.012202	371.032	21.0511	0.346202	39.1791	0.490496	26.3954	0.775068	0.65	2.34167	4.7894	4.68334	6.80324
511	205.467	1	0	690.936	39.6736	0.530611	22.3157	0.287875	23.4985	0.20554	0.11	8.4362	5.59547	16.8724	8.21274
512	466.023	1	0.00884607	803.214	23.5987	0.475766	117.914	0.569513	12.8394	0.694729	0.38	4.26442	5.80151	8.52884	7.54467
513	273.837	1	0	916.892	35.8635	0.659787	32.7461	0.293788	23.3654	0.0562418	0	10.3321	4.37332	20.6641	5.54395
514	589.201	1	0	1106.11	37.7153	0.422924	107.684	0.522546	49.4065	0.371118	0.1	8.13288	5.77916	16.2658	8.07257
515	540.193	1	0	1213.74	33.1342	0.550182	133.138	0.4379	27.8378	0.451846	0.18	6.63744	5.94729	13.2749	8.22541
516	184.194	1	0.0450827	294.219	13.0648	0.206317	68.5247	0.603406	44.8105	0.904135	0.84	1.01431	3.34925	2.02861	4.79667
517	169.384	1	0.058978	837.277	12.6547	0.20668	139.291	0.199936	13.334	0.905304	0.77	1.37069	3.82572	2.74138	5.06208
518	69.9802	1	0.0264888	1368.47	12.4415	0.0677464	139.673	0.050745	30.6892	0.90515	0.84	0.92663	3.15898	1.85326	4.2807
519	335.745	1	0	586.092	37.4655	0.482217	37.258	0.55072	27.5956	0.413756	0.21	6.95538	5.97952	13.9108	9.04565
520	115.444	1	0.00737929	624.966	20.1931	0.575359	46.0548	0.180104	18.9686	0.816212	0.69	2.08603	4.63143	4.17207	6.62452
521	48.5859	1	3.21968	1327.38	8.27574	0.0272608	70.0781	0.0363712	44.0107	0.949867	0.93	0.415147	2.18766	0.830294	3.04497
522	208.216	1	0	814.112	35.1497	0.741368	33.8329	0.249094	36.2478	0.426996	0.15	6.68452	6.11132	13.369	7.68341
523	371.75	1	0	1124.98	27.5259	0.252396	139.752	0.324829	17.4713	0.663052	0.49	4.02961	5.78504	8.05923	8.88426
524	288.867	1	0	3242.15	38.6608	0.794784	127.352	0.0885886	47.9771	0.151692	0.02	10.0164	4.63919	20.0328	6.33456
525	541.02	1	0	954.188	37.9765	0.460813	88.9617	0.553965	36.6087	0.320955	0.15	7.76649	5.78252	15.533	8.73486
526	164.99	1	0	5673.3	40.6693	0.590783	132.531	0.0289726	49.9938	0.111637	0.04	9.63873	4.77347	19.2775	6.87778
527	199.932	1	0.00212456	494.239	23.7276	0.573879	51.1568	0.389826	44.8238	0.772806	0.63	2.54513	4.97761	5.09026	7.16124
528	58.2929	1	0	3864.84	36.1834	0.7474	64.3591	0.0149795	46.6781	0.578267	0.36	4.76244	5.99264	9.52488	8.35916
529	441.412	1	0	791.848	37.3298	0.893326	45.2633	0.545994	27.5066	0.0785492	0.04	10.361	4.11168	20.7221	6.29294
530	106.769	1	0	1939.06	33.0651	0.563489	43.8643	0.0544923	6.60878	0.470741	0.2	6.39861	6.02762	12.7972	8.22142
531	160.857	1	0.00471241	413.201	14.8496	0.304726	69.3705	0.378038	27.2684	0.886623	0.81	1.2722	3.73364	2.5444	5.47751
532	152.522	1	0.00136316	1155.54	23.809	0.531299	78.1042	0.129999	27.9468	0.746506	0.53	3.04297	5.30685	6.08594	6.85057
533	580.999	1	0	1067.86	36.82	0.666163	86.2062	0.535344	44.1335	0.135442	0.02	9.70071	4.79505	19.4014	6.49445
534	201.133	1	0.0080956	522.476	16.3543	0.307648	73.9875	0.375925	13.3007	0.827458	0.71	1.89723	4.46595	3.79447	6.19585
535	440.062	1	0.00601534	691.675	24.2651	0.690846	96.5759	0.621989	17.0743	0.637214	0.38	4.21632	5.7836	8.43264	7.41497
536	227.9	1	0.822492	408.294	10.6186	0.0596079	135.93	0.545973	32.2235	0.944576	0.89	0.767735	2.93322	1.53547	4.62162
537	176.994	1	0	1926.7	29.1696	0.390455	93.2531	0.0909548	6.60802	0.529545	0.37	4.95985	6.06153	9.91971	8.83245
538	380.7	1	0	2450.36	36.2541	0.613023	127.162	0.154339	12.9016	0.10626	0.04	9.98289	4.52654	19.9658	6.7674
539	489.796	1	0	738.454	36.9526	0.450125	60.6895	0.644865	34.6083	0.303682	0.11	7.93742	5.70158	15.8748	8.12696
540	196.629	1	0	4185.55	32.9616	0.624302	121.132	0.0468168	6.77383	0.166065	0	9.27522	5.08053	18.5504	6.043
541	53.7417	1	0	6433.87	40.438	0.552271	61.8253	0.00832037	29.522	0.348524	0.11	7.6313	5.91987	15.2626	7.82928
542	298.389	1	0	936.786	31.9976	0.515277	54.8078	0.312424	7.54806	0.378509	0.18	6.85267	5.95376	13.7053	8.48037
543	332.575	1	0	748.085	35.1434	0.676737	31.0539	0.436639	22.7578	0.0651292	0	10.7792	3.90486	21.5584	5.06335
544	181.784	1	3.83778	276.998	7.37377	0.129977	20.9564	0.639233	27.5557	0.953323	0.91	0.534371	2.47663	1.06874	3.42819
545	673.113	1	0	983.969	33.2911	0.635128	94.2987	0.674264	8.23481	0.179644	0.05	9.4834	5.04341	18.9668	7.19685
546	458.533	1	0	1507.91	35.0844	0.54843	133.543	0.29989	28.9333	0.373516	0.16	6.9947	6.01965	13.9894	8.42102
547	613.526	1	0	1672.57	31.149	0.92719	126.254	0.364853	5.86177	0.0112621	0	11.0744	3.27739	22.1488	4.62214
548	19.8514	1	0	905.719	14.2189	0.0499224	28.7984	0.0216187	43.0059	0.914681	0.86	0.843577	3.09185	1.68715	4.2164
549	167.469	1	0.0070608	884.2	18.284	0.625248	76.2164	0.186649	8.02711	0.722661	0.58	2.62079	4.96561	5.24158	6.44435
550	343.882	1	0	981.355	25.5222	0.58768	121.347	0.34409	20.1347	0.6589	0.48	3.74088	5.62039	7.48177	8.02449
551	288.891	1	0.00108052	452.061	13.7768	0.60747	110.307	0.624401	15.9626	0.845365	0.75	1.5844	4.11634	3.1688	5.66552
552	167.712	1	0	745.292	35.1467	0.474584	32.944	0.2177	27.2598	0.592036	0.38	5.0282	6.02192	10.0564	9.21714
553	196.274	1	0	1072.87	28.558	0.537601	65.454	0.179611	16.1264	0.660563	0.41	4.32679	5.74712	8.65357	8.19384
554	376.388	1	0	572.496	32.9102	0.550141	37.641	0.637738	10.3631	0.362813	0.12	7.60682	5.7702	15.2136	7.91579
555	270.127	1	0	1363.32	36.6621	0.877949	49.1923	0.195784	18.6992	0.0629285	0.02	10.1334	4.51616	20.2668	6.15409
556	302.611	1	0	2169.13	38.5884	0.487538	92.5425	0.138276	38.5169	0.159326	0.03	9.63061	4.83321	19.2612	6.79156
557	260.946	1	0.00906344	430.78	17.2331	0.266243	90.6058	0.586747	40.5516	0.857931	0.75	1.63955	4.09491	3.2791	6.03798
558	721.745	1	0	1208.26	34.8212	0.947849	114.074	0.590441	24.4699	0.0292572	0.01	10.3512	4.03124	20.7024	5.82924
559	63.3131	1	0	4426.66	35.79	0.511602	71.3619	0.0142221	13.7475	0.577203	0.33	5.34966	6.02066	10.6993	8.87365
560	325.829	1	0	1691.34	34.4293	0.399768	95.9732	0.19052	10.3385	0.353619	0.13	7.77911	5.78169	15.5582	8.23651
561	140.266	1	2.42516	585.943	8.96753	0.0836654	102.535	0.236491	8.26624	0.937823	0.85	0.907406	3.20983	1.81481	4.36425
562	155.895	1	3.13762	512.226	8.11364	0.0715655	93.5587	0.300044	32.8777	0.93965	0.91	0.548914	2.54762	1.09783	3.5267
563	262.794	1	0	397.392	33.385	0.381811	22.2981	0.627799	15.0583	0.447383	0.25	6.0907	6.02766	12.1814	8.70899
564	308.075	1	0.00963444	603.695	23.6101	0.462425	71.0609	0.496624	12.3842	0.668799	0.52	3.48322	5.4873	6.96643	8.02506
565	227.962	1	0.026844	519.83	18.0077	0.366531	61.6332	0.427924	7.96344	0.773855	0.61	2.56123	4.93069	5.12246	6.84456
566	35.5503	1	0.0492376	1890.79	12.6487	0.153268	125.864	0.0186909	30.8126	0.918786	0.89	0.718606	2.86169	1.43721	4.27619
567	143.485	1	0.371681	215.16	11.4703	0.341983	28.7669	0.640463	6.19211	0.839221	0.79	1.30751	3.74074	2.61503	5.27592
568	374.896	1	0	927.176	27.659	0.674419	122.506	0.395783	47.9409	0.652438	0.46	3.80454	5.5203	7.60909	7.88765
569	146.09	1	0	1905.58	36.2628	0.419721	64.0968	0.0756909	33.1082	0.419833	0.25	5.87406	6.0604	11.7481	8.53228
570	89.1641	1	7.1391	437.328	5.70503	0.0411042	27.8023	0.201483	18.6845	0.956397	0.95	0.327722	2.05309	0.655443	2.87332
571	436.512	1	0	1148.58	36.1794	0.557759	74.0453	0.37421	19.5723	0.139345	0.04	9.13303	5.35856	18.2661	7.22605
572	392.228	1	0.0353624	656.728	18.5701	0.498793	134.686	0.585255	14.185	0.699143	0.62	2.55774	4.92702	5.11548	7.09878
573	702.723	1	0	1038.92	35.3051	0.953232	93.1509	0.667328	37.8457	0.0642046	0.01	10.5924	3.94381	21.1847	5.44272
574	45.5262	1	3.2825e-05	669.69	13.9973	0.104698	45.4479	0.0667655	28.8635	0.902932	0.86	0.902515	3.19313	1.80503	4.69481
575	224.094	1	0	721.869	36.1148	0.602187	28.572	0.301643	12.8927	0.325681	0.14	7.5361	5.90006	15.0722	8.40362
576	237.859	1	1.16436	351.99	10.3173	0.126206	84.2438	0.660506	13.4196	0.89152	0.81	1.12284	3.48721	2.24568	4.67943
577	309.864	1	0	787.402	37.5326	0.988639	30.4613	0.385677	42.841	0.105956	0.01	10.7534	3.79405	21.5068	5.50678
578	214.827	1	1.58889	331.404	9.72459	0.0709769	75.5909	0.631833	27.418	0.928888	0.87	0.800078	3.05985	1.60016	4.18649
579	153.808	1	0.013163	1347.1	22.3983	0.381539	102.544	0.112759	15.4295	0.775654	0.6	2.72809	5.09737	5.45618	7.26936
580	112.069	1	0	2246.72	31.4095	0.689547	79.0168	0.0493806	16.4883	0.631143	0.43	4.32129	5.87224	8.64258	8.65576
581	335.179	1	0	1734.09	37.4132	0.483432	89.4585	0.191104	10.8516	0.256731	0.11	8.79976	5.48766	17.5995	8.44854
582	187.444	1	0	440.724	26.9698	0.547699	27.6276	0.407626	16.2289	0.666928	0.45	3.92582	5.69857	7.85165	7.8947
583	375.606	1	0.00693857	644.59	23.3907	0.337949	111.415	0.56721	35.1124	0.807749	0.59	2.89132	5.18476	5.78264	7.55267
584	523.473	1	0	1325.16	35.8063	0.483791	94.6887	0.390321	43.133	0.071791	0	9.91605	4.59029	19.8321	5.88357
585	440.315	1	0.0335625	914.725	23.2103	0.427464	124.429	0.473854	6.61556	0.625918	0.41	4.3572	5.73769	8.7144	8.34555
586	345.482	1	0	2156.85	36.9196	0.732178	110.812	0.158806	24.8731	0.193971	0.04	9.13256	5.21983	18.2651	7.06301
587	685.513	1	0	1261.1	35.7841	0.559253	124.539	0.536347	26.696	0.159476	0.04	9.38237	4.99601	18.7647	6.98287
588	257.076	1	0	389.956	15.2381	0.131425	80.3328	0.639688	31.2559	0.83684	0.72	1.65876	4.13509	3.31752	5.36769
589	384.489	1	0	1110.74	37.2604	0.77037	57.2272	0.340899	26.8552	0.0878968	0.04	10.0676	4.33939	20.1353	6.42331
590	109.281	1	0	2712.43	42.2452	0.565139	45.8921	0.0399252	22.6676	0.196831	0.12	8.76808	5.27505	17.5362	8.32174
591	329.207	1	0	1326.93	32.1608	0.635868	116.464	0.244041	33.4474	0.561823	0.34	5.0541	5.98653	10.1082	8.61756
592	128.515	1	4.30961	388.573	6.78861	0.0512417	48.0218	0.325515	24.9538	0.964004	0.93	0.43349	2.2971	0.866981	3.19797
593	549.081	1	0	1629.66	35.2272	0.79249	121.384	0.333813	18.2131	0.124238	0.02	10.0049	4.68751	20.0097	6.33846
594	304.617	1	0	753.228	36.0698	0.672449	30.1918	0.396172	18.3296	0.078094	0.01	10.1982	4.39222	20.3964	5.97816
595	250.078	1	0	473.924	36.8753	0.253709	22.6727	0.503025	24.4826	0.361504	0.2	6.82625	5.93124	13.6525	8.73068
596	228.935	1	0.000912853	1173.41	25.0883	0.601975	114.472	0.192032	25.2896	0.743828	0.55	3.16349	5.3022	6.32698	7.74603
597	330.582	1	0	1364.08	29.3111	0.816637	130.094	0.238854	28.6283	0.593704	0.36	4.67985	5.8987	9.35971	8.06135
598	227.197	1	0	3325.66	40.0149	0.568281	112.954	0.0678712	40.0989	0.199167	0.06	9.10365	5.2012	18.2073	7.44252
599	360.44	1	0	525.788	35.3379	0.666657	28.914	0.662863	18.3681	0.262747	0.05	8.68188	5.36876	17.3638	7.15285
600	252.845	1	0	642.848	32.7942	0.503032	36.4915	0.380892	15.9567	0.40139	0.26	5.90885	6.01799	11.8177	8.55691
601	643.026	1	0	938.693	35.0566	0.645302	80.6845	0.674333	17.9902	0.0895985	0.02	10.0881	4.57956	20.1762	6.35007
602	624.862	1	0	1372.71	33.8315	0.554824	118.278	0.450553	10.5201	0.143025	0.04	9.83285	4.63551	19.6657	6.63507
603	573.393	1	0	984.091	36.2018	0.960094	71.5571	0.573961	35.6391	0.0452511	0.02	10.6409	3.85117	21.2817	5.64015
604	312.236	1	0	1079.07	29.428	0.776413	96.0514	0.284094	34.6098	0.549025	0.33	4.71772	5.81498	9.43543	7.7913
605	275.86	1	0	496.208	31.3594	0.641055	38.1219	0.532399	47.202	0.618508	0.35	4.71049	5.94465	9.42098	8.06294
606	418.676	1	0	1281.23	34.1723	0.648505	96.1326	0.321975	16.8657	0.308294	0.12	7.53151	5.89252	15.063	8.0635
607	262.862	1	3.60511	387.516	8.23022	0.134602	104.135	0.666162	27.3002	0.944355	0.89	0.67724	2.82079	1.35448	3.88169
608	27.3404	1	0.00153923	2445.78	19.8619	0.302635	60.0795	0.0111022	33.9062	0.833345	0.76	1.51292	3.93316	3.02584	5.65329
609	131.667	1	0.00363579	242.834	15.9228	0.374535	19.4314	0.517436	6.03398	0.816647	0.65	2.14863	4.61322	4.29725	6.01094
610	225.227	1	0.0100979	682.58	22.1471	0.473602	79.8708	0.321937	29.5138	0.751045	0.62	2.56301	4.93165	5.12602	7.06037
611	385.883	1	0	1101.64	29.3018	0.692331	123.356	0.344024	32.0606	0.613438	0.37	4.63649	5.90066	9.27299	8.14835
612	140.415	1	0	1020.38	33.1032	0.368674	40.8323	0.134486	30.3458	0.531932	0.38	4.69756	5.86014	9.39512	8.49826
613	296.235	1	0	1722.71	35.4377	0.790946	66.9017	0.170502	14.9931	0.0531827	0.01	10.3608	4.2834	20.7216	5.7405
614	683.717	1	0	1570.17	34.584	1.04692	131.758	0.432021	29.1157	0.0410283	0.01	11.0738	3.39792	22.1476	4.92286
615	297.643	1	0	962.178	36.1407	0.46463	58.794	0.302087	46.7579	0.474996	0.2	6.5161	6.00858	13.0322	8.27469
616	355.75	1	0	541.098	26.7359	0.530985	69.6437	0.634675	42.3991	0.685618	0.48	3.6551	5.62206	7.31019	7.74558
617	147.416	1	0.00649308	378.24	21.7189	0.362883	33.7184	0.372584	36.9352	0.779804	0.68	2.15026	4.62046	4.30051	6.73687
618	254.907	1	0.0157256	775.965	22.0298	0.369472	121.038	0.321186	44.6842	0.832391	0.7	2.17612	4.67079	4.35225	7.19731
619	137.612	1	0.0388233	898.588	13.329	0.292895	124.716	0.151348	11.9233	0.830783	0.79	1.33734	3.82905	2.67468	5.35743
620	413.251	1	0.00342358	752.09	23.9339	0.514204	113.975	0.537583	26.3123	0.643168	0.46	3.65183	5.6187	7.30367	7.318
621	769.195	1	0	1134.55	34.691	0.640315	115.876	0.669526	32.8902	0.0781059	0.01	10.1882	4.20973	20.3764	5.72596
622	213.599	1	0	624.206	34.1031	0.638811	28.6172	0.330661	24.8909	0.376297	0.21	6.16722	5.98134	12.3344	8.12337
623	111.78	1	1.27692	315.449	9.79952	0.169232	45.2233	0.345184	11.9327	0.904202	0.88	0.778919	2.98259	1.55784	4.45294
624	435.379	1	0	715.776	34.4983	0.616144	62.0174	0.590824	33.3915	0.337338	0.18	6.68615	5.92797	13.3723	8.2429
625	32.8598	1	0	3199.21	43.8156	0.507487	18.1698	0.0101818	40.4834	0.349651	0.12	7.85661	5.81968	15.7132	8.14627
626	68.5447	1	0	3354.34	39.8163	0.50946	33.1311	0.020308	5.77041	0.123537	0.08	9.4476	5.02067	18.8952	7.7365
627	387.059	1	0	1239.28	35.0877	0.46459	97.8804	0.306904	25.598	0.34911	0.21	6.59662	6.02781	13.1932	8.75001
628	141.811	1	7.86742	416.55	4.04775	0.0184115	43.6746	0.337399	49.319	0.988662	0.97	0.185845	1.51215	0.37169	2.12757
629	160.776	1	7.18123	291.153	3.30809	0.0260677	74.4881	0.54656	42.2709	0.981428	0.97	0.167926	1.36908	0.335853	1.92632
630	227.096	1	0.0129478	414.305	19.4411	0.338014	59.8414	0.528602	26.7052	0.802178	0.69	2.06511	4.51324	4.13021	6.67273
631	711.632	1	0	1460.74	37.7039	0.61209	139.761	0.481383	48.407	0.0597552	0.03	10.0676	4.57572	20.1353	6.61456
632	162.09	1	0.0031457	600.615	23.0132	0.311031	53.0167	0.26196	44.6999	0.834406	0.63	2.43524	4.82873	4.87048	6.83223
633	375.859	1	0.00849129	738.437	22.2841	0.418286	131.005	0.497789	34.2434	0.752451	0.58	2.83202	5.15033	5.66404	7.18815
634	194.94	1	0	949.142	24.512	0.435849	82.9677	0.201455	32.821	0.723357	0.56	2.99646	5.22706	5.99292	7.2514
635	343.624	1	0.0449592	660.542	21.6473	0.619339	83.8175	0.509101	8.40325	0.62999	0.48	3.61406	5.557	7.22811	7.68668
636	122.413	1	0.00898356	385.881	22.0346	0.603699	24.8304	0.303787	19.0921	0.720604	0.63	2.47845	4.91431	4.95689	6.91873
637	312.237	1	0	875.684	33.8112	0.362804	58.2172	0.348116	19.2269	0.382796	0.23	6.28123	6.02495	12.5625	8.632
638	296.203	1	0.0240882	679.21	17.6727	0.331446	134.721	0.427491	19.4319	0.836175	0.71	1.99834	4.52352	3.99669	6.6914
639	308.911	1	0	482.891	40.006	0.461731	22.5397	0.611006	38.5215	0.145093	0.1	8.65909	5.41	17.3182	8.05378
640	148.214	1	0.00261907	964.888	20.8981	0.468275	76.5426	0.151123	22.5389	0.791158	0.6	2.51607	4.91518	5.03214	6.46275
641	218.091	1	0.000780665	324.146	15.4915	0.251441	65.4264	0.647557	42.9375	0.867325	0.77	1.42384	3.8778	2.84768	5.38213
642	518.738	1	0	812.517	30.619	0.493778	81.7676	0.625513	10.198	0.336976	0.16	6.91826	6.00249	13.8365	8.14989
643	268.785	1	0	1112.72	28.3442	0.693936	108.497	0.237095	41.5805	0.68872	0.49	3.70644	5.63668	7.41289	8.05706
644	327.024	1	0	993.925	33.7568	0.378482	77.7574	0.32172	24.1089	0.501308	0.32	5.59914	5.98636	11.1983	9.08035
645	99.6511	1	0.0011305	2610.11	25.0592	0.50433	128.415	0.0378951	31.2233	0.716591	0.59	2.75321	5.07229	5.50643	7.15825
646	509.872	1	0	954.499	33.5243	0.644755	114.148	0.522085	44.0669	0.467441	0.28	5.70825	6.05819	11.4165	8.67884
647	123.129	1	0.00399484	945.116	24.5455	0.758667	39.1431	0.128038	5.23577	0.583634	0.42	4.00036	5.67834	8.00072	7.6999
648	226.724	1	0	731.936	26.7794	0.95046	45.6105	0.302712	6.5766	0.591293	0.34	4.87067	5.94078	9.74135	8.20744
649	133.227	1	0.00266104	413.702	18.3831	0.610371	40.4188	0.310927	25.4566	0.873728	0.72	1.80053	4.31382	3.60105	6.09978
650	462.063	1	0	756.573	38.805	0.432525	49.0515	0.595174	44.3879	0.200908	0.05	9.51416	4.99909	19.0283	7.17459
651	219.395	1	0.0996994	453.6	12.6379	0.168859	117.191	0.472796	38.7586	0.903941	0.82	1.10082	3.5178	2.20164	4.73569
652	296.624	1	0	2091.99	40.0753	0.524282	87.5763	0.140391	33.8788	0.170391	0.06	9.61058	4.88308	19.2212	7.41942
653	285.467	1	0.0163673	750.953	21.5462	0.597111	96.986	0.372388	17.4288	0.768139	0.56	2.95742	5.23135	5.91485	7.19114
654	404.454	1	0	687.025	37.7835	0.540521	43.0082	0.571567	27.51	0.175725	0.08	8.59286	5.45506	17.1857	7.89734
655	123.058	1	0	4161.61	39.3783	0.399656	70.7682	0.0294309	48.199	0.11046	0.01	9.86656	4.72335	19.7331	6.15386
656	332.765	1	0	664.201	28.7076	0.678532	74.7985	0.485746	48.3672	0.700495	0.45	3.92458	5.70307	7.84916	8.02145
657	116.985	1	3.02652	387.479	7.69161	0.0980082	57.5291	0.296706	17.2818	0.973423	0.91	0.556243	2.58075	1.11249	3.5725
658	335.221	1	0	610.042	26.6627	0.79537	66.2592	0.533368	46.7049	0.557391	0.38	4.10372	5.69269	8.20744	7.09615
659	767.179	1	0	1135.14	30.4918	0.390419	139.298	0.667866	5.09	0.235412	0.1	8.4629	5.61081	16.9258	8.16057
660	508.623	1	0	741.474	34.3998	0.569923	58.8894	0.670364	16.0139	0.181399	0.07	8.57318	5.49702	17.1464	7.40684
661	794.6	1	0	1247.8	39.5572	0.632731	139.8	0.626537	47.768	0.20305	0.08	9.55889	5.0879	19.1178	7.86792
662	228.364	1	0	520.159	32.6071	0.538705	30.5688	0.420902	38.9924	0.585673	0.31	5.10332	5.94431	10.2066	8.15684
663	519.314	1	0	898.866	36.7373	0.517559	86.565	0.563744	44.3052	0.293333	0.16	7.20785	5.9538	14.4157	8.50726
664	131.891	1	7.50867	340.82	3.39413	0.0478333	128.257	0.383951	5.98409	0.971145	0.94	0.352765	2.01731	0.705531	2.81581
665	310.421	1	0.00202931	464.066	15.7956	0.316192	116.488	0.651373	34.9805	0.880333	0.74	1.64861	4.19452	3.29723	5.71406
666	193.542	1	0.00970118	794.02	21.9474	0.362127	81.8917	0.238662	26.0505	0.783891	0.63	2.50926	4.97666	5.01851	7.01992
667	285.138	1	0	1028.3	29.8666	0.461664	68.3551	0.272437	11.6742	0.492128	0.24	5.77311	6.06236	11.5462	8.04527
668	205.638	1	0.863911	428.639	10.2126	0.153973	128.311	0.469573	48.8004	0.942637	0.89	0.69479	2.76651	1.38958	4.12701
669	256.066	1	0	365.613	31.3691	0.612368	23.8936	0.661949	41.0345	0.532485	0.29	5.07298	5.95175	10.146	7.77952
670	108.064	1	6.02676	497.657	5.90619	0.0196271	46.8498	0.214786	30.0413	0.976066	0.95	0.319995	2.00784	0.639991	2.81011
671	365.167	1	0	621.377	38.2411	0.412431	34.4495	0.568658	34.146	0.223477	0.07	8.73082	5.45032	17.4616	7.6347
672	91.5692	1	8.94941	216.409	2.1584	0.00192332	77.9242	0.419397	16.5648	0.976147	0.98	0.118972	1.18937	0.237943	1.67777
673	224.065	1	0.0029761	399.31	17.8831	0.290391	65.0557	0.541791	45.3734	0.845608	0.71	1.81528	4.35618	3.63056	5.82372
674	719.579	1	0	1352.94	37.5809	0.540273	128.966	0.525202	43.0427	0.0920174	0.03	10.2114	4.47214	20.4228	6.5552
675	184.829	1	0.00928499	592.77	19.4756	0.479557	63.9561	0.304154	18.257	0.799261	0.65	2.28304	4.74492	4.56607	6.59151
676	452.481	1	0.00639378	676.504	23.398	0.387836	138.435	0.651983	39.0005	0.689071	0.58	2.94733	5.14105	5.89465	7.58531
677	171.598	1	0	1192.72	25.8239	0.696346	72.983	0.141702	18.8811	0.624392	0.44	3.78362	5.61213	7.56725	7.34739
678	393.069	1	0	823.216	36.6844	0.649356	56.5615	0.465377	26.2263	0.394997	0.13	7.63817	5.92677	15.2763	8.36383
679	360.453	1	0	580.051	34.0005	0.35056	52.174	0.597272	33.7844	0.509274	0.36	5.27627	5.88193	10.5525	9.18092
680	129.056	1	0	650.882	32.7299	0.534358	25.9746	0.191174	42.5732	0.613908	0.42	4.27132	5.80708	8.54264	8.34472
681	140.133	1	0	1338.62	36.2702	0.494691	42.3899	0.102813	26.0521	0.422904	0.26	5.95364	6.01001	11.9073	8.6515
682	376.331	1	0	571.494	34.491	0.379783	39.8798	0.636001	26.2429	0.345555	0.14	7.13516	5.89038	14.2703	7.91594
683	201.822	1	0.052314	397.031	13.6433	0.239443	74.3039	0.494879	11.6292	0.867038	0.79	1.4265	3.98628	2.853	5.84539
684	434.609	1	0	1710.32	36.3422	0.676417	133.326	0.25099	24.2536	0.400309	0.15	7.54353	5.91822	15.0871	8.54404
685	438.519	1	0	2147.7	35.7404	0.519577	135.3	0.202594	14.4653	0.182753	0.05	9.46136	5.10142	18.9227	7.07305
686	107.57	1	0	5775.01	42.1743	0.598377	92.495	0.0185503	29.7577	0.205812	0.08	9.16252	5.28796	18.325	7.77282
687	283.92	1	0.000487749	1682.07	27.1694	0.838153	128.665	0.167093	19.7623	0.538774	0.26	5.03303	5.96202	10.0661	7.06498
688	526.732	1	0	915.305	38.1693	0.453241	71.5837	0.563097	29.3099	0.181897	0.08	9.02772	5.23621	18.0554	7.87785
689	207.588	1	1.78899	503.807	10.5691	0.141656	126.739	0.404495	31.8086	0.954476	0.89	0.76694	3.05412	1.53388	4.5233
690	116.606	1	0	1379.78	30.5311	0.572772	60.5275	0.0831033	46.5987	0.71065	0.5	3.58065	5.57156	7.1613	8.06646
691	150.052	1	0.00557917	306.06	15.8096	0.258571	41.9029	0.470385	24.4983	0.846253	0.78	1.43577	3.91831	2.87155	5.66701
692	100.984	1	0.0337751	989.553	21.7635	0.346591	49.9891	0.100387	6.4962	0.698689	0.63	2.68197	5.00334	5.36394	7.61363
693	202.972	1	0	979.081	34.1005	0.394656	32.8507	0.203602	5.79938	0.246609	0.09	8.13865	5.64027	16.2773	7.8479
694	715.04	1	0	1079.52	36.3679	0.431946	111.607	0.651671	38.5909	0.172965	0.04	9.32123	5.0307	18.6425	6.9462
695	298.804	1	0	724.749	29.6001	0.835542	54.2509	0.401785	21.9709	0.558227	0.26	5.32892	6.00251	10.6578	7.67851
696	116.012	1	0	3249.79	39.0075	0.430629	70.8822	0.0354307	17.4172	0.413398	0.18	7.23154	5.96897	14.4631	8.74573
697	484.012	1	0	1644.49	38.8565	0.524872	116.035	0.290735	45.4068	0.0956757	0.06	9.2822	5.08837	18.5644	7.41622
698	301.629	1	0	825.367	27.655	0.60304	78.3967	0.357161	19.4198	0.670969	0.42	4.25145	5.83748	8.5029	8.20361
699	603.177	1	0	1104.76	32.9848	0.347712	122.988	0.537044	20.4883	0.334658	0.12	7.30063	5.96842	14.6013	8.01033
700	299.7	1	0	851.74	29.9582	0.352324	68.691	0.343791	14.7482	0.563125	0.36	4.97377	5.89733	9.94755	8.72852
701	297.341	1	4.1208e-05	459.721	26.0744	0.492398	52.1935	0.620873	30.5176	0.740091	0.51	3.44384	5.43154	6.88768	7.87873
702	280.579	1	0	551.123	26.0172	0.538366	54.3777	0.492587	24.57	0.682313	0.46	3.76909	5.66184	7.53817	7.67567
703	100.537	1	0.000534548	514.737	15.4059	0.255796	53.6192	0.190568	25.693	0.900296	0.8	1.28964	3.78591	2.57927	5.33577
704	157.52	1	0.0126182	1066.8	19.4573	0.578147	81.6162	0.145757	7.63046	0.709957	0.57	2.78092	5.11552	5.56183	6.77107
705	292.46	1	0	1103.91	30.7691	0.727004	84.1592	0.260112	30.5162	0.527477	0.29	5.15946	6.04935	10.3189	7.9385
706	132.079	1	1.06354	228.256	10.6516	0.226106	33.2067	0.556413	10.1689	0.904969	0.87	0.90428	3.19789	1.80856	4.97828
707	263.617	1	0	1546.84	38.1327	0.71335	54.2278	0.168488	29.2425	0.114583	0.02	10.184	4.47589	20.3679	6.29853
708	52.6651	1	0	4981.19	35.7143	0.528965	78.6292	0.0105166	44.5284	0.543623	0.39	4.54606	5.79764	9.09212	8.34301
709	395.328	1	0	868.448	27.5405	0.76866	119.193	0.445052	47.5285	0.689574	0.45	3.85766	5.59731	7.71532	7.84975
710	243.189	1	0.00181709	791.386	24.5636	0.453035	85.5861	0.300258	29.462	0.763415	0.57	3.00797	5.24293	6.01594	7.60186
711	626.673	1	0	1566.12	34.3493	0.913417	121.863	0.396984	43.2488	0.0380978	0	10.9454	3.46528	21.8908	4.63555
712	198.011	1	5.4648	446.948	5.38723	0.028947	130.313	0.438249	48.57	0.984644	0.95	0.303171	1.90455	0.606341	2.66564
713	430.345	1	0	944.184	38.902	0.685615	55.0751	0.446752	34.1058	0.181316	0.04	9.90608	4.80987	19.8122	7.05859
714	337.697	1	0	746.256	26.1563	0.742597	94.8561	0.441253	36.3539	0.706632	0.49	3.54875	5.52892	7.09749	7.75496
715	259.416	1	0.00252522	429.154	23.9554	0.497809	41.3452	0.581627	16.4582	0.672668	0.48	3.54557	5.52072	7.09114	7.4416
716	105.162	1	3.46547	526.712	8.31519	0.100315	68.7746	0.197178	5.43977	0.918963	0.86	0.855225	3.13456	1.71045	4.27465
717	225.906	1	0.00347043	367.639	14.9791	0.352271	76.7071	0.59488	25.4667	0.855929	0.78	1.43422	3.90385	2.86843	5.67402
718	203.402	1	0	1072.14	34.578	0.566225	61.5321	0.185378	44.9762	0.588198	0.4	4.74391	5.98025	9.48782	8.95955
719	518.541	1	0	852.231	32.2533	0.392102	106.655	0.593699	34.2391	0.492544	0.3	5.53831	5.99259	11.0766	8.67311
720	394.323	1	0.0766114	579.776	20.3285	0.349138	122.122	0.662541	19.253	0.77333	0.67	2.46832	4.88965	4.93663	7.6526
721	644.254	1	0	1100.46	34.3927	0.876966	93.2391	0.57818	14.6489	0.0505716	0.02	10.2871	4.33358	20.5741	6.0843
722	508.101	1	0	931.429	34.4322	0.816588	61.8383	0.53756	16.0308	0.0515238	0.02	10.3311	4.10873	20.6622	5.7466
723	200.151	1	0	861.27	28.3173	0.691498	58.0486	0.227022	21.1421	0.659938	0.45	3.97404	5.76644	7.94807	8.17835
724	391.132	1	0.000287157	666.867	26.4308	0.800655	90.7004	0.570467	33.092	0.661965	0.46	3.83117	5.69378	7.66234	7.82359
725	115.634	1	1.47708	720.896	9.939	0.0606986	113.009	0.158516	23.3833	0.955575	0.87	0.7652	2.91565	1.5304	3.9881
726	527.906	1	0	767.172	37.0413	0.783689	53.9672	0.673266	43.2137	0.0932705	0.01	10.0582	4.63463	20.1163	6.22048
727	87.2718	1	0.00918953	222.645	14.1245	0.222317	24.4332	0.371795	36.5609	0.891031	0.84	1.01928	3.36727	2.03857	4.82061
728	435.692	1	0	645.083	32.621	0.463445	63.9729	0.654147	25.2322	0.460622	0.27	5.82891	6.05419	11.6578	8.67925
729	164.343	1	0.00414664	692.813	15.2557	0.321282	98.8885	0.233121	15.663	0.817615	0.76	1.54903	4.03071	3.09806	5.81263
730	128.783	1	0	1872.23	37.8443	0.597911	50.2159	0.0678844	49.9118	0.371307	0.19	6.49122	6.0487	12.9824	8.10159
731	716.124	1	0	1254.98	31.4786	0.44119	136.05	0.56452	6.02142	0.180379	0.06	8.95226	5.39058	17.9045	7.54526
732	385.651	1	0	932.164	37.1182	0.5813	52.6801	0.405541	17.6534	0.195376	0.06	9.16326	5.24995	18.3265	7.54947
733	402.974	1	0	1294.03	36.9959	0.380032	98.2167	0.306043	24.8571	0.297063	0.2	7.14758	6.01614	14.2952	9.0589
734	240.253	1	0.191379	425.069	11.9944	0.061439	125.623	0.552266	44.7879	0.936155	0.83	1.01864	3.35916	2.03728	4.53715
735	307.156	1	0.0325202	469.329	14.7473	0.353484	86.5811	0.640413	5.58749	0.83911	0.67	2.22719	4.7103	4.45439	6.83948
736	115.572	1	0.000377365	510.666	25.0732	0.551967	28.2604	0.217965	49.4027	0.751852	0.58	2.75342	5.14888	5.50684	6.88482
737	590.097	1	0	1018.16	35.5053	0.52244	84.4716	0.570427	22.819	0.112958	0.03	9.58949	4.80819	19.179	6.68136
738	269.641	1	0	2013.21	32.377	0.795086	134.727	0.132523	33.4807	0.514087	0.27	5.46126	6.08868	10.9225	8.08912
739	393.688	1	0	1201.91	36.4519	0.867129	61.7575	0.323321	16.2498	0.0781227	0.02	10.3601	4.37623	20.7202	6.30903
740	328.918	1	0	1114.88	37.034	0.501148	68.1354	0.289169	30.8286	0.328945	0.16	7.22621	5.90748	14.4524	8.50514
741	591.187	1	0	944.328	35.6511	0.419433	89.4148	0.613769	47.9059	0.212648	0.05	8.38529	5.42562	16.7706	7.10848
742	197.933	1	0.0231201	426.331	17.1966	0.32803	57.7972	0.450188	12.3203	0.830074	0.72	1.92985	4.44444	3.8597	6.62907
743	283.449	1	0	2767.59	35.7895	0.535296	136.233	0.101678	11.8943	0.302556	0.13	7.83109	5.75634	15.6622	8.39874
744	191.863	1	0.011427	321.846	19.1811	0.557955	30.7051	0.57142	10.0466	0.748246	0.59	2.63086	4.98602	5.26171	6.71301
745	448.615	1	0	1207.5	36.7793	1.03608	66.9699	0.366998	29.7933	0.0276919	0.02	10.9455	3.77622	21.8911	5.56318
746	96.5781	1	0	3539.29	32.4083	0.54316	96.0065	0.0271134	17.5309	0.524331	0.35	4.8461	5.91912	9.6922	8.29787
747	617.934	1	0	1317.47	37.5062	0.417557	136.835	0.461511	43.9603	0.291179	0.12	8.01946	5.70243	16.0389	8.27156
748	112.478	1	0	593.37	28.0038	0.541793	26.9271	0.182945	37.7144	0.742149	0.53	3.27687	5.42552	6.55374	7.60831
749	278.088	1	0	1439.2	26.7809	0.922017	139.006	0.190707	33.0769	0.599566	0.43	3.89269	5.65225	7.78539	7.53294
750	500.871	1	0	767.776	30.7522	0.459385	81.6567	0.637303	10.6101	0.413513	0.24	6.30232	6.04827	12.6046	8.84058
751	367.153	1	0	773.45	32.0916	0.225133	68.917	0.462088	15.4886	0.479108	0.34	5.49465	6.0051	10.9893	9.2829
752	274.736	1	0.00111049	498.11	13.4129	0.334681	139.326	0.539875	20.1491	0.880616	0.8	1.3168	3.76692	2.6336	5.6299
753	63.0459	1	0	5210.55	32.6346	0.241434	131.494	0.01204	44.351	0.708164	0.55	3.40536	5.43566	6.81073	8.46233
754	357.792	1	0	1081.98	38.3321	0.821712	54.0464	0.324962	42.6902	0.0629404	0.04	9.64229	4.75724	19.2846	6.73473
755	60.8782	1	1.37557	893.539	10.2647	0.0293613	77.9602	0.0674494	17.0764	0.947031	0.88	0.72753	2.89533	1.45506	3.97257
756	336.171	1	0	2257.17	39.3097	0.49464	115.675	0.147529	42.263	0.22066	0.07	8.9011	5.28066	17.8022	7.63542
757	491.14	1	0	795.01	28.1416	0.530681	94.4513	0.604804	11.5053	0.425356	0.28	5.54408	6.05516	11.0882	8.35765
758	120.687	1	0.0109632	371.436	12.8728	0.109846	59.0528	0.315684	42.872	0.894454	0.83	1.00234	3.30635	2.00468	4.46595
759	736.466	1	0	1080.95	33.9459	0.554054	116.075	0.671729	12.0131	0.137275	0.05	9.26292	5.16287	18.5258	7.34392
760	164.826	1	1.54748e-05	417.928	24.1613	0.530211	32.2023	0.377628	32.6064	0.770143	0.58	2.80575	5.03223	5.61151	7.14762
761	434.001	1	0.0099466	910.148	25.4896	0.771355	101.792	0.469096	6.80218	0.527471	0.3	5.2259	6.0675	10.4518	8.17402
762	243.042	1	0	927.263	37.8833	0.390413	45.264	0.255334	46.8155	0.413994	0.21	6.64414	6.00976	13.2883	8.58482
763	253.033	1	0.0201024	926.129	22.1597	0.886769	88.1642	0.268859	8.62812	0.683017	0.47	3.57601	5.50271	7.15203	7.45909
764	135.357	1	0	827.698	29.8758	0.558813	36.8956	0.159344	43.7403	0.674693	0.41	4.05305	5.62641	8.1061	7.5795
765	510.063	1	0	1862.94	38.2144	0.81602	123.743	0.271265	45.9762	0.0874116	0.03	10.4219	4.21552	20.8438	6.29354
766	428.448	1	0	668.408	29.9872	0.431242	80.2876	0.621918	25.5535	0.572558	0.39	4.74072	5.9701	9.48145	8.728
767	316.168	1	0	922.224	36.0048	0.475304	47.9904	0.33566	13.9272	0.219593	0.11	8.14882	5.73055	16.2976	8.09763
768	238.062	1	0.0205437	357.364	14.1206	0.395053	57.3559	0.647715	5.74441	0.774899	0.7	1.97157	4.46357	3.94314	6.40366
769	205.705	1	0.00588002	660.388	15.2165	0.340035	111.686	0.305957	15.3258	0.859504	0.75	1.63526	4.16646	3.27051	5.93614
770	487.225	1	0	929.06	31.0297	0.411334	118.263	0.512959	34.4825	0.598813	0.33	5.12859	5.96116	10.2572	8.52009
771	429.233	1	0.000161292	776.31	26.3128	0.843032	109.395	0.540277	27.1799	0.628607	0.42	4.07709	5.72692	8.15417	7.8517
772	328.575	1	0	606.064	36.1866	0.552964	36.3155	0.52342	25.1432	0.34897	0.16	7.25225	5.92413	14.5045	8.36393
773	223.035	1	0	1103.07	38.3861	0.564106	48.0863	0.197771	41.8667	0.478219	0.19	6.85526	6.01507	13.7105	8.61161
774	177.479	1	0	4342.94	40.5194	0.713837	116.341	0.0406559	45.0915	0.188471	0.07	9.02887	5.16529	18.0577	7.39199
775	50.3074	1	8.42359	297.276	1.85714	0.00201094	112.016	0.168297	9.33493	0.986092	0.98	0.106866	1.06681	0.213732	1.50486
776	253.752	1	0	1322.89	30.376	0.673881	109.273	0.188665	47.4882	0.54661	0.43	4.13906	5.75184	8.27812	8.18785
777	25.7679	1	0	5834.37	44.4444	0.611958	22.9002	0.00439656	44.6458	0.185252	0.06	8.95241	5.24411	17.9048	7.42587
778	234.35	1	0.00184208	545.496	26.9298	0.360476	38.4078	0.415807	7.83978	0.513221	0.42	4.41133	5.86841	8.82265	8.63215
779	426.411	1	0	1208	35.4887	0.870941	64.937	0.348943	37.0169	0.0897084	0	10.7418	3.8141	21.4835	5.07732
780	318.981	1	0	967.952	27.55	0.442084	109.034	0.322888	25.8833	0.720837	0.49	3.80079	5.63866	7.60158	8.38882
781	263.541	1	0	658.095	29.2735	0.469267	42.0849	0.389633	6.12681	0.540475	0.31	5.49268	6.0684	10.9854	8.98239
782	277.045	1	0	958.567	36.4561	0.531965	54.0413	0.282158	38.979	0.442036	0.19	6.57186	6.06123	13.1437	8.44741
783	116.658	1	0.0203054	255.597	16.5574	0.2452	21.9104	0.434261	8.4509	0.822475	0.74	1.75996	4.21085	3.51992	6.37648
784	73.3623	1	0	10430	40.331	0.503353	124.623	0.00701797	10.7179	0.258119	0.11	8.39181	5.69842	16.7836	8.28052
785	431.084	1	0	753.157	30.8598	0.307996	95.0003	0.556297	49.8124	0.557429	0.4	4.55019	5.86269	9.10039	8.46211
786	151.048	1	5.32343	471.958	6.08053	0.01054	107.866	0.316481	23.5842	0.947993	0.93	0.413827	2.18299	0.827654	3.03859
787	187.209	1	0.00533226	686.749	18.0715	0.360005	80.8489	0.26723	17.5655	0.852681	0.66	2.13296	4.58466	4.26591	6.23605
788	141.274	1	0	427.026	15.7586	0.103499	57.6005	0.321079	46.7115	0.833677	0.77	1.39242	3.88282	2.78484	5.13692
789	262.676	1	0.00429242	641.533	24.0509	0.541052	62.1839	0.398987	16.0296	0.692181	0.47	3.61339	5.55972	7.22678	7.46509
790	256.091	1	0	540.527	30.4703	0.427154	42.5008	0.455337	26.6215	0.617187	0.44	4.28794	5.88011	8.57588	8.69638
791	178.365	1	0.150812	506.208	11.9182	0.287554	100.472	0.345831	13.1806	0.857123	0.81	1.1848	3.57234	2.36961	5.10502
792	511.506	1	0	776.586	33.3546	0.424206	98.2405	0.640041	49.6852	0.502351	0.32	5.38237	6.06727	10.7647	8.79153
793	272.046	1	0	1790.95	30.3001	0.393896	129.567	0.150213	20.6065	0.577656	0.32	5.09397	5.91787	10.1879	8.18846
794	445.914	1	0	1202	28.795	0.553143	123.89	0.36577	9.4707	0.433261	0.26	5.8433	6.07549	11.6866	8.47549
795	213.982	1	0.0312791	699.043	22.1472	0.172357	88.7873	0.298554	25.0093	0.77448	0.71	2.23124	4.71742	4.46248	7.63197
796	406.509	1	0	1009.73	36.57	0.430708	60.6504	0.395401	18.324	0.18006	0.06	9.10529	5.11697	18.2106	7.40086
797	210.896	1	0.00488676	529.977	18.0489	0.6049	80.7349	0.387433	35.7278	0.803053	0.71	1.84242	4.32705	3.68484	6.02339
798	393.686	1	0	923.852	27.0127	0.876262	123.12	0.417511	40.1678	0.659865	0.43	3.9648	5.69673	7.9296	7.70595
799	303.058	1	0	1088.28	39.2233	0.5382	48.3496	0.273232	22.1926	0.184638	0.08	9.1684	5.23616	18.3368	7.87652
800	707.209	1	0	1285.38	31.4456	1.18431	116.986	0.545811	7.05499	0.0200434	0.01	10.5596	3.81401	21.1192	5.30528
801	264.889	1	0.0178483	411.364	17.8061	0.406986	80.5977	0.62237	29.3065	0.831148	0.74	1.77847	4.25952	3.55694	6.43959
802	155.444	1	0	1133.96	40.4167	0.397814	28.0607	0.134292	36.148	0.200736	0.09	8.42986	5.39731	16.8597	7.86365
803	586.806	1	0	1080.85	28.373	0.444321	124.509	0.535674	7.38593	0.37507	0.15	6.88507	5.97326	13.7701	7.8361
804	6.89132	1	0	152691	43.0726	1.07154	134.839	4.51261e-05	42.4397	0.0258673	0.02	10.6885	3.69687	21.3769	5.51365
805	299.203	1	0	2598.35	38.3041	0.418676	119.394	0.114245	32.2787	0.191202	0.06	8.8497	5.53186	17.6994	7.45224
806	228.667	1	0.00257766	398.969	18.4744	0.523441	67.2425	0.552515	49.1205	0.868871	0.72	1.78829	4.27713	3.57658	6.04689
807	155.039	1	0.00708196	983.944	22.3068	0.287791	80.6854	0.154858	22.2737	0.779272	0.63	2.54044	4.9655	5.08087	7.06464
808	467.311	1	0	1562.19	34.8624	0.969258	90.2624	0.296691	17.5901	0.011619	0.02	10.9887	3.4921	21.9773	5.19566
809	329.581	1	0.00986869	589.619	19.7902	0.422338	109.984	0.545028	34.0027	0.765556	0.64	2.35281	4.81134	4.70562	6.58662
810	304.641	1	0	2558.26	32.9181	0.515555	104.282	0.1185	5.04168	0.0405618	0.01	10.1877	4.40627	20.3754	5.86064
811	539.581	1	0	1282.96	30.9675	0.424546	109.12	0.416108	7.07478	0.235675	0.04	8.59814	5.44206	17.1963	6.96716
812	303.45	1	0.0559271	576.815	18.6227	0.334195	98.2313	0.513712	11.6657	0.818006	0.67	2.3678	4.84178	4.73559	7.34833
813	264.53	1	0.00475816	536.781	22.3456	0.483098	67.4358	0.477883	35.0929	0.757934	0.57	2.79015	5.06672	5.58031	6.84787
814	53.2091	1	0.146338	1350.51	12.3673	0.125132	112.755	0.0390905	16.8624	0.951515	0.87	0.847622	3.11247	1.69524	4.59629
815	624.99	1	0.00928044	911.215	25.3265	0.510441	129.273	0.675919	5.72675	0.441366	0.23	5.94465	6.06289	11.8893	8.14832
816	128.923	1	0	1186.14	37.8848	0.570538	23.526	0.106856	11.5498	0.230944	0.07	8.75387	5.3413	17.5077	7.53833
817	393.97	1	0	620.962	28.0304	0.68848	78.8321	0.614854	46.4529	0.619681	0.42	4.1198	5.78589	8.2396	7.77674
818	231.63	1	0	1447.28	31.55	0.526891	98.9476	0.157605	49.3907	0.561877	0.37	4.57032	5.8259	9.14064	8.07832
819	334.721	1	0	500.414	31.5368	0.443772	38.4895	0.643091	15.6896	0.489106	0.28	5.73147	6.08227	11.4629	8.60159
820	142.939	1	0.0169884	741.131	12.879	0.227283	113.013	0.19021	9.29815	0.886514	0.81	1.26464	3.71502	2.52927	5.62325
821	176.999	1	0	480.766	31.7101	0.730947	25.0102	0.351484	37.8367	0.597345	0.39	4.44972	5.84984	8.89945	8.21646
822	219.131	1	0	941.066	25.1057	0.632942	93.6615	0.2282	42.7522	0.694702	0.57	2.95578	5.22685	5.91156	7.38129
823	238.49	1	0	3012.58	39.0813	0.972754	92.642	0.0786957	26.5531	0.0420212	0.03	10.5608	4.27058	21.1216	6.34272
824	116.919	1	0	738.586	35.4463	0.54421	19.4707	0.153385	24.6517	0.468557	0.24	5.88679	6.05076	11.7736	8.28605
825	284.563	1	0	1457.01	33.0746	0.631736	61.2801	0.193352	5.10473	0.150212	0.03	9.17557	5.16916	18.3511	6.90394
826	388.816	1	0	1592.33	32.926	0.419677	137.353	0.241042	22.7827	0.402422	0.24	6.09533	5.97073	12.1907	8.53692
827	249.798	1	0	1341.01	36.5173	0.505045	48.6105	0.183824	15.8753	0.162997	0.04	9.31567	5.03527	18.6313	6.8607
828	165.224	1	0	694.139	26.1938	0.460609	52.6037	0.231234	36.6184	0.727664	0.6	2.90139	5.19185	5.80279	7.72235
829	164.741	1	1.13776	480.079	9.92237	0.036378	96.4344	0.336403	49.4533	0.938916	0.88	0.698757	2.78339	1.39751	3.81922
830	137.311	1	0	3548.89	37.1417	0.454031	105.663	0.0384249	45.7555	0.410652	0.21	6.27412	6.08013	12.5482	8.16754
831	418.301	1	0	928.523	40.7402	0.623707	60.0561	0.439401	43.7822	0.178321	0.12	8.64104	5.47062	17.2821	8.52162
832	380.724	1	0	883.6	28.3511	0.447157	104.745	0.421461	27.0651	0.616944	0.41	4.3034	5.72439	8.60679	8.31124
833	113.846	1	0	1190.9	41.6352	0.488277	27.5494	0.0933649	48.8433	0.42034	0.24	6.58414	6.01373	13.1683	9.16426
834	550.036	1	0	1387.38	36.9491	1.06881	100.563	0.391825	16.4633	0.0799818	0.05	10.2736	4.34218	20.5471	6.90988
835	115.189	1	6.15261	361.223	5.02357	0.0845825	71.8818	0.315089	14.3352	0.94257	0.94	0.351888	2.01007	0.703776	2.80561
836	237.198	1	0.0222614	565.94	19.1409	0.308684	75.8481	0.408699	15.5914	0.771018	0.65	2.35339	4.81276	4.70677	6.82884
837	271.647	1	0	946.4	35.2151	0.817431	33.2064	0.282753	19.5877	0.0360437	0	10.4475	4.14782	20.895	5.32532
838	286.407	1	0	997.011	38.1521	0.514381	52.6506	0.280612	46.4045	0.321469	0.15	7.25739	5.92097	14.5148	8.33139
839	268.439	1	0.00277544	385.847	19.1079	0.495524	60.8753	0.670309	37.7094	0.80319	0.64	2.24179	4.73078	4.48357	6.11426
840	399.306	1	0	1529.57	38.3674	0.996959	77.5767	0.258183	45.7633	0.0184807	0.03	10.6662	3.96143	21.3324	5.9865
841	807.248	1	0	1201.09	32.2061	0.95263	117.101	0.666711	11.474	0.0109372	0.01	11.2513	3.01454	22.5027	4.57663
842	611.122	1	0	1161.48	34.4698	0.606077	115.002	0.518209	9.55125	0.292156	0.14	8.32727	5.70893	16.6545	8.73793
843	264.967	1	0	800.548	35.2531	0.593675	54.8556	0.320967	41.9888	0.564967	0.36	5.13679	6.07993	10.2736	9.18355
844	333.477	1	0	1146.42	27.6667	0.733621	107.82	0.286364	15.9149	0.597733	0.34	4.78168	5.8389	9.56336	7.99984
845	143.73	1	0.0111722	1041.99	22.9212	0.574297	62.7108	0.135789	8.85106	0.701738	0.53	3.21543	5.32293	6.43086	7.46829
846	207.872	1	6.15403	320.052	5.73485	0.0291718	88.7629	0.639041	32.4313	0.973083	0.96	0.311218	1.95707	0.622437	3.20817
847	671.183	1	0	1138.87	33.4598	0.678269	111.418	0.581725	19.7246	0.151655	0.02	9.27664	5.01083	18.5533	6.39936
848	222.011	1	0	1823.03	37.8323	0.721122	53.3243	0.120641	35.09	0.101375	0.01	10.3	4.17831	20.5999	5.87112
849	141.207	1	0	779.112	32.2814	0.77246	34.9133	0.175846	49.4795	0.598872	0.43	4.1881	5.74071	8.3762	8.21688
850	611.767	1	0	984.14	35.7777	0.692693	89.6954	0.610635	30.2141	0.170984	0.04	9.03239	5.35316	18.0648	7.05636
851	397.112	1	0	573.334	35.9994	0.814256	28.504	0.675366	17.6434	0.104033	0.02	10.6691	4.06174	21.3381	5.78545
852	102.002	1	6.3024	432.358	4.6514	0.0228937	88.2842	0.233695	19.5162	0.976387	0.95	0.283275	1.77523	0.566551	2.48447
853	261.429	1	0	632.246	30.0946	0.436364	36.9802	0.401929	6.21316	0.445328	0.26	5.95153	5.9385	11.9031	8.75189
854	773.375	1	0	1260.95	33.372	0.828183	125.173	0.607437	17.2223	0.0552549	0	10.5696	3.93203	21.1392	5.38296
855	188.218	1	0	658.486	33.1297	0.553981	22.5778	0.278023	5.93468	0.34524	0.13	7.31425	5.92171	14.6285	8.1445
856	415.844	1	0	1255.56	31.6824	0.614718	134.906	0.325689	45.7277	0.552102	0.3	5.21343	5.98744	10.4269	8.18403
857	496.648	1	0	951.241	37.3706	0.458839	80.0322	0.510536	27.3052	0.330541	0.15	7.90714	5.81562	15.8143	8.61325
858	216.315	1	0	1512.04	26.8034	0.694844	135.774	0.141167	49.1337	0.721144	0.53	3.25627	5.38952	6.51255	7.56451
859	43.6671	1	0	16529.6	42.4376	0.393921	105.584	0.00263796	34.4493	0.211971	0.05	9.35131	5.05781	18.7026	7.03531
860	114.967	1	8.70527	228.102	3.13943	0.0134222	26.5033	0.497869	19.6329	0.980591	0.97	0.179809	1.46103	0.359619	2.05559
861	166.577	1	0	1979.15	32.0709	0.665645	83.8637	0.0832652	28.5167	0.44231	0.27	5.3275	6.00287	10.655	7.78514
862	651.99	1	0	987.959	33.3681	0.672099	94.9807	0.650023	7.57216	0.201787	0.07	9.15057	5.22037	18.3011	7.71362
863	362.406	1	0	969.395	35.1569	0.627907	45.4029	0.368426	15.8641	0.0239558	0.01	10.4459	4.08093	20.8918	5.66575
864	366.662	1	0.00367187	525.035	23.7224	0.765657	85.391	0.675508	45.6442	0.724705	0.56	2.98141	5.26829	5.96281	7.24846
865	217.894	1	0.016843	598.341	16.4722	0.227138	98.6176	0.356457	16.2246	0.878781	0.74	1.76777	4.32651	3.53554	6.3226
866	612.594	1	0	1275.07	35.7284	0.771869	98.4475	0.475138	22.3611	0.04917	0.02	10.7488	3.9952	21.4975	5.77991
867	250.598	1	0.00124715	1216.99	25.2818	0.776745	112.556	0.20292	16.7977	0.698011	0.48	3.65703	5.55665	7.31405	7.84658
868	560.492	1	0	886.528	32.2625	0.426499	114.87	0.617819	44.8627	0.416125	0.24	5.79052	5.96171	11.581	8.18901
869	96.5107	1	0	5275.31	41.6667	0.575217	69.7365	0.0182197	43.3946	0.107424	0.03	9.95987	4.68109	19.9197	6.72343
870	379.8	1	0	617.324	30.4812	0.52812	41.5699	0.600256	7.84741	0.271971	0.09	7.53809	5.90552	15.0762	7.27942
871	17.6448	1	0	2113.67	16.1453	0.213787	38.7738	0.00829484	11.2476	0.902926	0.78	1.30924	3.74492	2.61849	4.9727
872	620.725	1	0	1036.54	38.393	0.499071	108.088	0.586158	43.7756	0.260851	0.14	7.98158	5.72539	15.9632	8.65185
873	381.409	1	0	1038.63	36.9247	0.380593	60.1698	0.360554	13.2317	0.209222	0.1	8.85499	5.17798	17.71	8.08785
874	457.546	1	0	950.666	32.9782	0.4072	105.704	0.470424	30.4336	0.493035	0.32	5.50973	6.01869	11.0195	8.99284
875	79.3204	1	6.39141	521.082	5.73532	0.0378696	47.8324	0.150648	29.7366	0.963896	0.97	0.235709	1.6577	0.471419	2.81366
876	632.226	1	0	940.743	35.6573	0.537967	99.0432	0.658375	30.8425	0.268741	0.1	8.05875	5.86621	16.1175	7.92292
877	270.071	1	0	1322.18	37.2247	0.238896	71.8415	0.200643	34.3822	0.408765	0.21	6.68816	6.04848	13.3763	8.73365
878	161.878	1	0	838.726	25.8567	0.346784	69.0493	0.188378	48.516	0.778771	0.64	2.62898	4.98181	5.25797	7.60919
879	204.219	1	0	753.49	32.3657	0.495767	41.5628	0.263166	36.0624	0.588133	0.34	4.92446	5.95108	9.84892	8.21368
880	203.532	1	0	530.128	14.688	0.120294	93.2903	0.375718	24.8708	0.883898	0.74	1.55047	4.03777	3.10095	5.2835
881	148.592	1	0	916.597	40.353	0.401493	20.4887	0.158215	23.5275	0.185292	0.08	8.88727	5.41186	17.7745	7.80105
882	462.641	1	0	1608.5	35.8468	0.879804	93.9872	0.285079	38.804	0.0336523	0	10.7502	3.79485	21.5005	5.22348
883	118.52	1	0	2656.38	33.7948	0.318048	87.7674	0.0442168	20.6357	0.48288	0.37	4.8698	5.95707	9.73959	8.82332
884	478.213	1	0	833.477	37.4205	0.357935	70.7415	0.558748	43.9679	0.288882	0.15	7.51634	5.89739	15.0327	8.40382
885	153.964	1	2.64653	400.008	8.38585	0.109734	71.983	0.378121	17.6936	0.933272	0.88	0.698223	2.78177	1.39645	3.81704
886	123.024	1	7.07925	400.446	4.47479	0.0602296	114.384	0.304269	14.8792	0.988126	0.95	0.304219	1.90729	0.608438	2.66932
887	93.9569	1	0	3564.69	25.7111	0.657549	125.963	0.0262219	6.33388	0.723042	0.5	3.62361	5.57577	7.24721	8.08064
888	199.739	1	0.00453945	814.404	20.0216	0.462567	93.3799	0.240723	28.5083	0.80149	0.63	2.33894	4.78178	4.67789	6.3762
889	215.086	1	7.59305	344.492	4.32255	0.018129	63.2297	0.61733	46.7994	0.973465	0.96	0.239869	1.6835	0.479738	2.36236
890	317.373	1	0	766.973	34.1362	0.636539	33.5446	0.406055	6.7145	0.110054	0.04	9.75439	4.73393	19.5088	6.57297
891	426.584	1	0.0262098	777.771	22.5845	0.53715	138.706	0.537288	18.5664	0.646988	0.55	3.19869	5.29747	6.39739	7.82407
892	733.841	1	0	1146.28	35.9557	0.346304	133.588	0.629765	30.0308	0.252455	0.08	8.48532	5.56363	16.9706	7.84525
893	477.986	1	0	1071.72	35.7218	0.489541	106.284	0.436713	48.6257	0.4262	0.22	6.46493	6.08638	12.9299	8.61549
894	601.789	1	0	1229.47	34.5553	0.508671	139.495	0.481534	43.3852	0.426335	0.13	7.14798	5.95848	14.296	7.91311
895	350.412	1	0	1422.7	30.2739	0.562978	137.876	0.2428	38.8065	0.617145	0.33	4.88274	5.90106	9.76549	7.96072
896	326.424	1	0.863355	492.195	10.9581	0.244836	123.428	0.653118	6.45594	0.875955	0.72	1.68016	4.18935	3.36031	5.43836
897	373.126	1	0	614.019	33.7905	0.581247	40.7466	0.589584	12.2897	0.300588	0.14	7.47301	5.92224	14.946	8.20269
898	178.389	1	0	1024.2	40.7172	0.551756	26.0897	0.170522	41.9777	0.209624	0.05	9.39201	5.14956	18.784	7.23327
899	383.938	1	0	1312.52	33.766	0.387562	134.608	0.287333	47.2428	0.521879	0.37	5.03737	6.01706	10.0747	9.02775
900	404.969	1	0	768.924	36.8065	0.597984	46.5503	0.514022	13.6638	0.198029	0.08	8.94341	5.43878	17.8868	7.97841
901	568.759	1	0	887.234	33.9887	1.07522	63.9298	0.632024	15.3934	0.0580345	0	10.6606	4.02998	21.3213	5.38812
902	113.355	1	0.797908	449.39	10.8767	0.0576761	61.037	0.246848	32.2889	0.93704	0.87	0.788564	3.00908	1.57713	4.11635
903	577.685	1	0	1580.78	34.7755	0.711618	117.834	0.362298	15.6889	0.0924571	0.02	10.5248	3.98877	21.0497	5.85215
904	311.485	1	0	664.613	30.9215	0.401923	58.7823	0.453935	28.4818	0.54179	0.39	4.67264	5.82231	9.34528	8.63071
905	564.015	1	0	1334.04	36.4404	0.541654	114.391	0.416953	26.7316	0.245551	0.07	8.88606	5.35079	17.7721	7.50206
906	327.526	1	0	1134.28	37.9452	0.623484	48.9955	0.284369	48.8416	0.0910919	0.01	10.2292	4.40222	20.4584	5.99543
907	302.274	1	0	2427.98	37.0968	0.437298	128.805	0.123397	22.6143	0.26598	0.13	7.7364	5.87514	15.4728	8.32409
908	216.403	1	0	2755.94	38.84	0.659308	83.0261	0.0779764	17.8455	0.108433	0.05	9.77158	4.69852	19.5432	7.12375
909	407.378	1	0	1891.8	37.496	0.820811	99.6087	0.213479	45.6392	0.0472548	0.02	10.5071	4.09555	21.0143	5.81824
910	582.431	1	0	939.781	29.186	0.424558	113.346	0.609263	7.65321	0.450969	0.22	6.50325	6.07521	13.0065	8.70366
911	38.4277	1	0	1298.17	28.1135	0.673912	20.5139	0.0291179	12.0592	0.72023	0.53	3.27681	5.35463	6.55362	7.72257
912	622.326	1	0	1132.42	36.9513	0.513997	120.149	0.539464	42.8629	0.323733	0.13	7.88747	5.86153	15.7749	8.21024
913	351.054	1	0.0147795	551.499	14.6932	0.389156	120.621	0.624785	7.68575	0.840374	0.67	2.15609	4.63469	4.31217	6.56719
914	397.986	1	0	603.425	36.983	0.60717	40.0609	0.637247	38.6772	0.295568	0.09	7.93434	5.77302	15.8687	7.81064
915	292.447	1	0	1558.44	38.6646	0.400593	65.4219	0.185297	25.8946	0.139501	0.05	9.42332	4.96563	18.8466	7.28009
916	480.602	1	0	724.271	36.2294	0.610151	45.9278	0.649303	30.8438	0.092428	0.01	10.159	4.44974	20.318	6.02077
917	102.214	1	0	2323.15	37.2198	0.587687	45.582	0.043565	45.6575	0.356389	0.11	7.06605	6.00722	14.1321	7.36466
918	131.54	1	0.00255498	372.915	15.5439	0.323442	51.921	0.34081	34.9975	0.896411	0.81	1.2483	3.66448	2.4966	5.41319
919	380.914	1	0	1239.1	34.991	0.614077	102.68	0.301901	45.8542	0.476937	0.23	6.18391	6.18523	12.3678	8.42227
920	386.378	1	0	825.193	26.7168	0.619145	72.345	0.459947	5.25598	0.417085	0.23	5.93046	6.0423	11.8609	8.10222
921	191.33	1	0	474.75	33.798	0.5492	24.0072	0.383674	39.9197	0.549162	0.35	4.93432	5.97041	9.86864	8.53784
922	301.091	1	0	1475.95	37.2698	0.49432	59.4261	0.201673	19.1815	0.101362	0.03	10.1273	4.45361	20.2546	6.45565
923	146.788	1	1.21733	657.121	10.0775	0.0281211	126.934	0.220237	48.8482	0.926442	0.88	0.7004	2.78539	1.4008	3.82153
924	154.71	1	0.000536827	701.908	24.4566	0.494983	48.9416	0.214742	34.0331	0.731722	0.55	2.96016	5.16367	5.92032	7.01122
925	233.216	1	0.000564815	1023.53	25.5762	0.717597	87.4424	0.223866	17.0689	0.680639	0.48	3.67367	5.57489	7.34734	7.83726
926	255.352	1	0	1223.97	27.0411	0.411561	82.8465	0.205793	5.24054	0.588999	0.34	5.09772	5.9699	10.1954	8.65688
927	200.208	1	0.0212147	684.047	18.6671	0.582296	74.7555	0.28691	9.65514	0.838993	0.63	2.45337	4.86401	4.90674	6.87694
928	629.507	1	0	1227.07	36.7363	0.647386	120.7	0.505002	31.8238	0.218912	0.08	8.62981	5.45343	17.2596	7.7857
929	72.5605	1	0	1585.21	30.3314	0.625883	50.0238	0.0450873	46.2627	0.735383	0.58	3.10261	5.33379	6.20521	8.0507
930	173.315	1	6.47271	308.965	5.27766	0.0647118	63.4298	0.552704	20.3655	0.973494	0.94	0.370348	2.11359	0.740696	2.95001
931	143.861	1	0.00110118	959.523	14.7928	0.135468	139.322	0.14806	33.2634	0.875926	0.78	1.33996	3.83742	2.67993	5.09638
932	376.271	1	0	701.341	28.276	0.355617	57.2795	0.524584	6.4247	0.4558	0.21	6.17093	6.04018	12.3419	8.15981
933	309.771	1	0	2041.03	34.9555	0.503822	114.427	0.150302	26.5198	0.383858	0.1	7.49569	5.81133	14.9914	7.58141
934	242.261	1	2.5592e-05	550.548	25.7499	0.529154	56.2161	0.425005	49.4085	0.712753	0.54	3.139	5.33175	6.278	7.37298
935	586.345	1	0	1606.25	36.268	0.735843	125.051	0.361477	36.2354	0.0653245	0.01	10.2163	4.47345	20.4326	6.02614
936	125.015	1	0	684.566	29.208	0.833445	28.1104	0.177154	24.3711	0.643672	0.42	4.04569	5.68112	8.09138	7.79373
937	359.303	1	0.0122616	630.654	22.459	0.472098	110.192	0.554783	30.8953	0.751156	0.61	2.73363	5.03977	5.46727	7.45757
938	283.962	1	0.020227	592.642	16.3196	0.609571	82.5941	0.470535	5.31837	0.676178	0.57	2.73741	5.04089	5.47482	6.68896
939	194.728	1	0	664.721	14.567	0.0901224	100.853	0.288131	14.4467	0.790885	0.71	1.72925	4.22518	3.4585	5.46293
940	34.592	1	0	4807.39	31.7075	0.539608	53.2444	0.00716105	10.8577	0.585339	0.41	4.25793	5.71572	8.51585	8.0754
941	288.071	1	0	2100.44	39.3843	0.550976	95.9561	0.135708	28.0132	0.184769	0.1	8.54732	5.46881	17.0946	8.19398
942	175.511	1	0	344.627	30.5161	0.651735	17.4911	0.47924	26.9747	0.538896	0.38	4.45771	5.7399	8.91541	8.08222
943	217.838	1	0.0788631	441.397	12.4556	0.0739216	111.111	0.482379	33.6677	0.86942	0.81	1.13165	3.51339	2.26331	4.71437
944	224.519	1	0.0234639	970.585	20.0211	0.365688	127.197	0.227706	20.5424	0.81365	0.66	2.30144	4.71059	4.60289	6.90778
945	407.555	1	0	1466.12	37.361	0.54074	100.099	0.274012	37.4718	0.300949	0.1	8.06038	5.65189	16.1208	7.91546
946	164.868	1	0	3334.26	36.1061	1.03556	69.3869	0.0492327	17.4142	0.0279486	0.01	10.8057	3.6454	21.6113	5.13725
947	548.821	1	0	859.18	38.2543	0.563443	69.145	0.624245	39.4328	0.126696	0.07	9.12933	5.15215	18.2587	7.55915
948	229.311	1	0	544.167	39.445	0.575073	20.8487	0.403788	40.561	0.341585	0.12	7.85625	5.77775	15.7125	8.19464
949	576.489	1	0	1045.54	34.8247	0.397993	105.773	0.541286	21.2346	0.327015	0.14	7.66319	5.884	15.3264	8.31692
950	308.872	1	0	440.718	28.2406	0.76038	42.5187	0.670637	25.1881	0.553826	0.43	4.19668	5.82513	8.39337	8.18543
951	91.6958	1	0.00222205	944.353	16.6391	0.251291	80.1775	0.0957081	18.9717	0.89779	0.78	1.45752	3.96958	2.91504	5.79693
952	630.517	1	0	956.059	37.387	0.653201	94.4684	0.645806	37.5968	0.227948	0.09	8.55976	5.4779	17.1195	7.92165
953	452.142	1	0	755.727	29.7284	0.770317	86.0976	0.583521	30.438	0.571939	0.27	5.3024	5.91833	10.6048	7.85989
954	350.614	1	0	2130.19	37.3201	0.540373	131.498	0.162917	35.7034	0.260002	0.13	7.70125	5.8459	15.4025	8.11502
955	26.8436	1	0	23446.7	43.2067	0.60262	127.921	0.00114343	47.7802	0.380576	0.19	6.73142	5.97023	13.4628	8.48633
956	397.119	1	0	951.528	28.0507	0.348767	115.29	0.409073	19.6649	0.588183	0.42	4.40077	5.84244	8.80153	8.56696
957	175.136	1	0.0300017	1158.11	21.0506	0.291472	115.021	0.149126	15.8443	0.778066	0.67	2.37225	4.85239	4.74449	7.28382
958	324.713	1	0	1245.58	29.9779	0.620336	120.644	0.256381	38.1809	0.571952	0.38	4.51647	5.81845	9.03294	8.14734
959	171.751	1	0	1484.7	38.0691	0.572497	42.3965	0.114005	28.6082	0.217443	0.08	8.11979	5.7111	16.2396	7.58302
960	318.832	1	0	2765.27	36.3578	0.850931	112.19	0.114679	26.9611	0.0278589	0.01	10.7073	3.89807	21.4147	5.44033
961	117.006	1	0.0052151	573.43	23.183	0.46995	32.4348	0.197936	17.4291	0.778052	0.59	2.74118	5.05449	5.48236	7.12791
962	285.871	1	0.000739762	434.706	14.4785	0.262411	115.424	0.640517	31.9983	0.916749	0.77	1.4362	3.9193	2.87241	5.44969
963	316.395	1	0	504.901	32.4264	0.505913	38.363	0.601071	35.9651	0.494546	0.27	5.47146	5.98679	10.9429	8.15773
964	321.222	1	0.00436434	614.935	17.5134	0.357209	139.307	0.510969	36.93	0.793064	0.7	1.89782	4.37975	3.79564	6.10176
965	309.214	1	0	1255.23	38.1004	0.940708	50.5332	0.242982	48.9155	0.0724842	0.02	10.3783	4.14303	20.7565	5.90116
966	337.821	1	0	834.972	32.9179	0.733417	69.3662	0.394174	47.6486	0.53628	0.28	5.42702	6.03995	10.854	8.1776
967	473.45	1	0	1063.92	38.9995	0.538295	70.9786	0.436831	45.2992	0.195771	0.05	9.54284	5.00011	19.0857	7.23143
968	172.536	1	0.000771151	412.121	15.5338	0.348615	63.9261	0.406255	25.4044	0.852743	0.77	1.47814	4.02361	2.95628	5.5893
969	401.797	1	0	2458.09	39.0754	0.806295	131.401	0.162229	23.9253	0.0710785	0.06	10.2189	4.38873	20.4378	7.12871
970	252.814	1	0	1952.74	33.3645	0.326331	125.259	0.127979	33.5539	0.573818	0.31	5.33699	6.00581	10.674	8.50701
971	454.255	1	0	1541.43	34.1287	0.58999	109.765	0.291513	7.52764	0.226348	0.09	8.64407	5.53357	17.2881	8.1097
972	120.193	1	0	1535.61	33.7772	0.481878	51.1673	0.0770634	26.064	0.613381	0.37	4.86516	5.95117	9.73032	8.58881
973	363.51	1	0	852.584	35.5901	0.739687	41.9235	0.418652	9.87817	0.0633002	0.04	9.94368	4.59066	19.8874	6.74511
974	103.894	1	7.7837	385.305	4.84336	0.0411146	25.4821	0.266566	23.5015	0.976919	0.96	0.260281	1.82829	0.520563	2.56558
975	169.273	1	0	475.167	29.3582	0.510438	27.0978	0.340764	24.7304	0.656933	0.47	3.88946	5.64863	7.77893	8.2881
976	242.502	1	0	2715.05	36.1294	0.560617	121.843	0.088618	15.3062	0.322128	0.16	7.34435	5.92561	14.6887	8.50744
977	93.2993	1	4.95224	347.461	6.66814	0.0478172	34.0974	0.264086	10.9855	0.962452	0.92	0.493929	2.43356	0.987858	3.37807
978	157.952	1	0	1093.92	33.0908	0.433337	42.7699	0.141514	19.6683	0.590964	0.29	5.42385	5.98742	10.8477	8.38059
979	230.701	1	0.0051271	644.668	18.1384	0.34462	97.6643	0.350221	25.1158	0.832596	0.68	2.03884	4.5377	4.07769	6.23648
980	88.7511	1	0	573.833	26.7055	0.679112	17.8272	0.149674	8.39965	0.734533	0.46	3.78714	5.56684	7.57428	7.84912
981	571.145	1	0	1341.24	38.0956	0.558165	108.841	0.41986	24.1272	0.13864	0.08	9.50612	4.92139	19.0122	7.72127
982	257.712	1	0	649.481	33.6098	0.237344	46.8179	0.382562	36.3947	0.538011	0.41	4.72172	5.89571	9.44344	9.101
983	609.464	1	0	972.896	33.0645	0.834257	79.6079	0.618229	6.97906	0.0847747	0.02	10.0694	4.66894	20.1388	6.50443
984	151.349	1	0	1830.88	38.2881	0.769962	35.5344	0.0818988	47.1204	0.132589	0.01	10.5834	3.84074	21.1668	5.43992
985	193.992	1	0	337.203	26.3701	0.460132	26.0303	0.543286	24.0857	0.641477	0.55	3.25094	5.3787	6.50188	7.98327
986	84.4057	1	0	1864.82	36.6069	0.660592	25.5151	0.0447845	6.84591	0.239783	0.07	8.36148	5.61095	16.723	7.49686
987	263.802	1	0	642.149	29.6871	0.518201	53.8156	0.397599	37.554	0.653565	0.43	4.17336	5.79428	8.34672	8.16118
988	353.43	1	0	1411.58	32.9299	0.597159	97.1427	0.247046	18.2834	0.427992	0.14	6.94154	6.02763	13.8831	7.83486
989	317.104	1	0	591.825	40.8044	0.58102	28.0803	0.515609	46.812	0.148783	0.09	8.81014	5.42765	17.6203	8.06708
990	95.9476	1	0	2351.41	36.7426	0.430916	38.1247	0.0404487	6.54576	0.265589	0.1	8.03586	5.71345	16.0717	8.01498
991	377.715	1	0	537.714	31.8963	0.31159	50.2905	0.675738	42.7131	0.550564	0.29	5.32198	5.93072	10.644	8.10743
992	472.586	1	0	744.703	36.5208	0.448847	56.2227	0.618148	18.0007	0.237792	0.11	8.35265	5.73195	16.7053	8.28556
993	180.762	1	0.00463508	292.122	21.3123	0.354602	33.3039	0.584314	44.8932	0.818484	0.7	2.03822	4.62177	4.07645	6.71114
994	255.184	1	0	551.177	36.8254	0.454754	20.9461	0.447518	13.1826	0.164777	0.07	8.89132	5.28593	17.7826	7.53818
995	110.647	1	0.392251	533.83	11.453	0.172632	89.1761	0.203475	35.3476	0.940068	0.88	0.771004	2.94483	1.54201	4.32197
996	271.202	1	0	978.777	36.9111	0.813956	34.3826	0.272598	26.2132	0.0393301	0.01	10.4047	4.12723	20.8094	5.78254
997	273.807	1	0	691.326	39.908	0.398123	35.6231	0.381772	41.159	0.369484	0.21	7.01641	6.09304	14.0328	9.21962
998	555.217	1	0	1583.13	36.7193	0.90909	114.283	0.34723	36.54	0.0496369	0.02	10.4315	4.22958	20.8629	5.96954
999	508.821	1	0	1204.68	37.5963	0.802116	81.3531	0.416411	27.5632	0.0672099	0.04	10.1757	4.47236	20.3515	6.67679
1000	275.533	1	0	814.663	41.0369	0.614993	31.9632	0.329202	48.491	0.0928816	0.07	9.36365	5.12671	18.7273	7.57713
1001	109.006	1	0.00294911	1499.12	19.7983	0.318638	113.842	0.0719497	33.8319	0.772602	0.69	1.94399	4.40425	3.88798	6.0899
1002	159.636	1	0	737.067	29.9288	0.453928	42.3766	0.210154	49.9346	0.676751	0.49	3.69065	5.61131	7.38131	7.95774
1003	146.838	1	0	646.736	39.1546	0.57413	17.5711	0.218628	42.3425	0.370198	0.15	7.12916	5.77322	14.2583	8.25644
1004	121.902	1	0	434.361	20.5003	0.402858	27.647	0.271017	20.2898	0.752672	0.59	2.53354	4.95771	5.06708	6.18234
1005	293.253	1	0	973.835	26.7692	0.399557	106.877	0.295193	26.1873	0.690846	0.51	3.58815	5.59356	7.1763	8.19151
1006	256.524	1	0.0132157	671.004	18.9352	0.380615	116.397	0.373947	32.4633	0.784677	0.7	1.97423	4.38812	3.94847	6.51619
1007	618.117	1	0	1324.94	36.2467	0.581713	124.253	0.460123	24.1907	0.236054	0.07	8.90505	5.43017	17.8101	7.61742
1008	207.098	1	0	3329.81	36.7356	0.675523	95.7097	0.0618774	19.1999	0.146178	0.02	9.81955	4.47161	19.6391	6.22045
1009	521.116	1	0	862.983	36.6002	0.611897	79.9589	0.589131	41.3938	0.311821	0.14	7.51669	5.90222	15.0334	8.25105
1010	157.063	1	0.0141578	587.015	17.5912	0.232119	67.5688	0.26135	17.2548	0.824381	0.73	1.81922	4.36377	3.63843	6.30004
1011	353.238	1	0.000712372	879.542	25.1741	0.598276	107.522	0.393819	27.9712	0.667864	0.42	3.88071	5.63493	7.76141	7.32752
1012	488.44	1	0	896.036	29.7045	0.804117	122.474	0.533135	36.8552	0.591194	0.36	4.78763	5.92764	9.57526	8.26192
1013	78.7872	1	0.00258555	664.25	17.4927	0.232252	52.7403	0.116019	41.609	0.845875	0.8	1.32691	3.79664	2.65382	5.56345
1014	247.81	1	0	1926.02	31.269	0.501728	115.234	0.127339	15.9341	0.436648	0.26	5.61543	6.02471	11.2309	8.23965
1015	421.522	1	0	1263.63	32.3262	0.394647	129.903	0.328055	21.5848	0.471306	0.32	5.52391	6.10527	11.0478	9.07574
1016	328.5	1	0.00901763	647.61	22.5077	0.346686	108.088	0.49407	45.1567	0.72873	0.61	2.61626	4.96159	5.23252	7.09086
1017	670.58	1	0	996.573	34.2625	0.528827	107.821	0.661224	17.3985	0.278332	0.08	8.34338	5.60477	16.6868	7.83459
1018	576.642	1	0	1258.85	36.8554	0.563029	111.676	0.45115	31.6798	0.201936	0.06	8.76968	5.42552	17.5394	7.61565
1019	272.578	1	0.00674397	418.623	22.9923	0.38004	56.1579	0.624751	39.6181	0.751999	0.61	2.65802	5.04019	5.31604	7.16384
1020	251.293	1	0.0316532	653.571	19.5357	0.399212	93.1016	0.375958	16.3916	0.755852	0.66	2.3498	4.80485	4.6996	7.03511
1021	143.426	1	4.04346	606.195	7.76257	0.015712	105.119	0.233907	32.2053	0.941471	0.92	0.500683	2.46535	1.00137	3.42211
1022	563.948	1	0	986.562	32.2505	0.411801	108.573	0.561125	19.0972	0.392059	0.16	6.89072	5.92322	13.7814	8.12688
1023	249.399	1	0	465.163	36.9532	0.445249	21.0504	0.511361	27.7049	0.37494	0.15	7.20037	5.89483	14.4007	8.29221
1024	222.978	1	0	785.106	30.2692	0.59659	53.5911	0.27642	40.5918	0.623895	0.39	4.35523	5.8597	8.71046	7.955
1025	249.307	1	0	641.21	38.9494	0.842353	20.5488	0.378062	38.1348	0.0713504	0.03	10.3622	4.2056	20.7245	6.21461
1026	117.598	1	0.0178109	1734.47	20.8871	0.393644	118.518	0.0671722	14.2474	0.838458	0.66	2.33071	4.76528	4.66141	6.9307
1027	623.027	1	0	1666.69	35.3467	1.04965	128.587	0.370829	45.2149	0.028081	0	10.974	3.67312	21.948	4.95285
1028	121.025	1	0.0199062	1345.74	20.3752	0.53977	88.2724	0.0889158	9.17796	0.743629	0.63	2.49375	4.87006	4.9875	7.03176
1029	162.493	1	0.0559648	488.012	13.5693	0.23828	71.1106	0.325894	6.69844	0.884896	0.79	1.48729	3.96575	2.97459	6.19978
1030	196.614	1	0	1942.66	32.5129	0.348153	102.857	0.100052	29.7688	0.54583	0.34	5.02875	5.95519	10.0575	8.34326
1031	323.886	1	0.00152548	664.19	25.8321	0.812721	73.3744	0.474764	22.1699	0.664263	0.44	3.90836	5.73548	7.81672	7.74037
1032	38.691	1	0	11545	42.833	0.621835	82.625	0.00334321	31.1868	0.299699	0.15	7.38779	5.93481	14.7756	8.46494
1033	64.5962	1	0	3806.86	34.9315	0.470988	72.8578	0.0168544	30.2685	0.606409	0.39	4.59249	5.85311	9.18499	8.52582
1034	198.225	1	0	717.408	32.3988	0.377978	42.9253	0.267503	25.2218	0.573317	0.45	4.39365	5.9172	8.78729	9.10268
1035	455.78	1	0	1029.45	34.8284	0.34774	86.7214	0.434183	20.2656	0.349519	0.16	7.26832	5.81858	14.5366	8.47308
1036	83.6153	1	1.46521	494.054	10.1569	0.00512931	42.4156	0.165777	24.0952	0.916686	0.88	0.717856	2.85432	1.43571	3.91606
1037	383.451	1	0.0256436	613.636	16.0479	0.430241	120.082	0.614095	6.95734	0.765513	0.6	2.63397	5.06312	5.26793	6.79572
1038	299.364	1	0	1247.02	32.9082	0.547488	96.5805	0.235807	38.2272	0.448218	0.32	5.20108	5.99748	10.4022	8.5002
1039	442.894	1	0	978.12	37.6252	0.508942	83.0484	0.442102	32.8738	0.368652	0.21	6.97673	6.06155	13.9535	9.2304
1040	253.207	1	0.00934491	395.595	13.4534	0.142104	76.057	0.624381	11.4686	0.824993	0.7	1.75742	4.21504	3.51485	5.42891
1041	109.001	1	0	2902.62	28.3795	0.456977	137.425	0.0372687	47.4248	0.672151	0.55	3.12993	5.2527	6.25987	7.68392
1042	211.011	1	0	3542.26	40.4618	0.650488	116.597	0.0591851	39.0436	0.214596	0.08	8.72492	5.44539	17.4498	7.84964
1043	534.225	1	0	1930.24	36.5461	0.803606	135.294	0.274514	23.8318	0.0589669	0.02	10.3558	4.30417	20.7117	6.28565
1044	135.214	1	4.14986	444.865	6.03408	0.0213892	61.4457	0.300122	42.6158	0.950903	0.94	0.341927	1.95736	0.683853	2.73222
1045	428.483	1	0	686.422	35.8616	0.563158	60.7675	0.603961	35.1506	0.451232	0.24	6.41501	6.0535	12.83	8.95029
1046	177.133	1	0.0070057	374.859	18.3517	0.31902	50.9074	0.454434	29.5423	0.883077	0.75	1.71136	4.26481	3.42272	6.33602
1047	201.844	1	0	1616.61	39.4757	0.440078	59.7442	0.122975	34.9972	0.27941	0.16	7.369	5.91315	14.738	8.64673
1048	62.5298	1	0.00709981	1446.04	20.2989	0.376926	63.91	0.0427552	13.8715	0.815721	0.72	1.91332	4.41405	3.82663	6.61463
1049	389.604	1	0.00459033	564.522	23.954	0.538029	99.2697	0.668725	46.3936	0.766075	0.58	2.93453	5.25144	5.86906	7.44936
1050	179.237	1	0.000143137	490.922	14.0238	0.443302	102.406	0.356586	38.0617	0.866711	0.82	1.14952	3.56966	2.29904	5.11619
1051	193.008	1	0.798028	361.111	10.6365	0.13793	80.7165	0.522101	10.8016	0.898485	0.84	1.04405	3.34101	2.0881	5.06725
1052	223.298	1	0	2016.82	33.6413	0.399325	81.1046	0.109708	7.90799	0.316449	0.12	7.53707	5.95626	15.0741	8.00311
1053	228.442	1	1.32443	514.747	10.5261	0.0460792	136.545	0.436323	26.5302	0.915092	0.85	0.922935	3.26128	1.84587	4.4338
1054	143.058	1	4.3202	675.312	8.21609	0.0443477	116.848	0.209597	26.1926	0.955248	0.91	0.569543	2.63143	1.13909	3.64191
1055	21.4668	1	0.000334114	3119.83	23.2282	0.430153	46.5853	0.00683844	38.5387	0.826742	0.69	1.95671	4.4281	3.91342	6.1024
1056	456.812	1	0	1853.18	31.731	0.769685	106.221	0.245177	5.29824	0.0338777	0.01	10.8588	3.56252	21.7175	4.95458
1057	272.54	1	0	1489.51	33.7438	0.5487	95.5282	0.180278	48.4374	0.441464	0.24	5.73552	6.08226	11.471	7.98754
1058	437.529	1	0	688.667	38.5719	0.725579	42.1767	0.617799	35.3373	0.14117	0.05	9.51634	5.01083	19.0327	7.23655
1059	369.05	1	0	1796.96	31.8989	1.31409	77.9555	0.204384	28.9802	0.0124808	0	11.5973	2.26306	23.1945	3.167
1060	342.158	1	0.0206731	841.849	24.4615	0.668631	88.8372	0.39897	7.19115	0.571674	0.41	4.35276	5.84759	8.70551	8.33777
1061	348.807	1	0	1744.54	35.8293	1.07811	76.357	0.198331	11.2765	0.0238871	0.03	10.8288	3.75877	21.6576	5.85641
1062	159.224	1	0.00458261	886.224	18.1563	0.433134	111.231	0.176726	34.0708	0.836796	0.74	1.70699	4.25718	3.41398	6.04613
1063	535.424	1	0	827.09	33.3737	0.524719	85.6482	0.632422	34.2283	0.342187	0.14	6.91945	6.01435	13.8389	7.78536
1064	294.923	1	0.0422678	1409.47	22.178	0.594454	134.198	0.207217	5.03896	0.57411	0.4	4.19547	5.76658	8.39094	7.76209
1065	470.51	1	0	1434.52	35.7025	0.483585	123.566	0.323269	35.5403	0.330304	0.13	7.3749	5.90125	14.7498	8.10069
1066	125.405	1	0	1229.11	36.1508	0.479377	23.8669	0.100498	5.94705	0.232841	0.07	8.71408	5.54361	17.4282	7.54302
1067	237.337	1	0	774.511	41.5439	0.529242	27.0153	0.29743	41.7032	0.169759	0.1	9.04706	5.25077	18.0941	7.99227
1068	143.252	1	0.00877315	1339.9	21.5043	0.314669	120.655	0.105557	34.6039	0.785864	0.68	2.14621	4.61069	4.29241	6.72059
1069	347.604	1	0	713.772	36.6708	0.384603	38.8625	0.473949	22.4057	0.172339	0.07	8.51133	5.51359	17.0227	7.59896
1070	269.689	1	0.000304719	707.426	26.1074	0.65742	56.2181	0.372265	8.53266	0.615139	0.38	4.53937	5.85178	9.07873	8.17524
1071	176.438	1	0	704.38	29.1249	0.516519	39.3959	0.243326	21.6744	0.638017	0.42	4.19788	5.77434	8.39576	8.08198
1072	214.696	1	1.2496	446.101	9.86683	0.0777194	122.182	0.472224	42.7702	0.936036	0.88	0.733475	2.93117	1.46695	4.02287
1073	393.146	1	0	1646.33	33.3976	0.710228	105.091	0.236404	9.2556	0.323311	0.08	8.35226	5.49084	16.7045	7.57704
1074	321.472	1	0	1110.34	38.3409	0.63303	49.0057	0.284726	25.2357	0.171563	0.04	9.81228	4.78257	19.6246	6.93956
1075	340.848	1	0	485.575	33.391	0.543501	36.5403	0.672174	26.4545	0.494701	0.24	5.94154	6.12229	11.8831	8.49825
1076	244.06	1	0.00189249	412.448	18.6473	0.441771	72.491	0.570996	49.9917	0.809126	0.71	1.83315	4.31328	3.6663	6.1018
1077	221.319	1	0	667.032	27.2395	0.434826	52.2318	0.32227	23.9607	0.716535	0.47	3.76059	5.52399	7.52118	7.9452
1078	459.589	1	0	943.493	34.6619	0.548998	74.5027	0.477483	18.4139	0.280104	0.1	7.81521	5.86768	15.6304	7.98498
1079	526.103	1	0	1230.71	35.6144	0.414535	101.273	0.421196	24.2201	0.18882	0.06	8.62943	5.52994	17.2589	7.43767
1080	350.295	1	0	723.592	34.0241	0.50956	59.0249	0.469434	24.8563	0.50797	0.3	5.70431	6.11293	11.4086	9.11802
1081	180.467	1	0.00149602	319.762	16.8411	0.213007	50.4517	0.540963	43.6515	0.845635	0.77	1.49989	4.09814	2.99979	5.66057
1082	208.047	1	0	1099.25	42.2528	0.501667	34.1088	0.185172	49.5048	0.161811	0.09	8.9863	5.27688	17.9726	8.0332
1083	269.217	1	0	1975.63	31.4364	0.403952	138.439	0.134834	29.6147	0.494769	0.3	5.20752	5.92858	10.415	8.10136
1084	466.423	1	0	1012.78	29.9499	0.504603	111.414	0.452259	16.0626	0.478544	0.27	5.70362	6.06201	11.4072	8.40615
1085	240.744	1	0	3783.09	35.2651	1.07388	111.367	0.0634199	10.7625	0.0101828	0.02	11.1645	3.2339	22.3291	5.08377
1086	184.163	1	0	1239.77	38.9537	0.372264	44.247	0.145599	24.0645	0.435214	0.22	6.9284	5.96078	13.8568	9.12118
1087	162.061	1	0	739.38	39.1787	0.511298	17.6818	0.213096	47.1362	0.158217	0.03	9.02527	5.30623	18.0505	6.84669
1088	539.728	1	0	886.641	37.5663	0.908515	61.5089	0.597517	42.9145	0.0506504	0.02	10.4613	4.34663	20.9226	6.11192
1089	159.543	1	0	4281.08	38.5352	0.608703	105.848	0.0370855	28.9836	0.215022	0.05	8.79642	5.37766	17.5928	7.15261
1090	451.087	1	0	1545.2	35.9727	0.731695	100.711	0.288711	26.5605	0.188422	0.02	9.37627	5.14377	18.7525	6.66864
1091	564.161	1	0	1829.3	39.7043	0.860481	139.801	0.305117	48.4286	0.117029	0.05	10.0047	4.72324	20.0094	7.21134
1092	231.893	1	0	1444.07	37.3878	0.4573	46.2536	0.158629	23.8632	0.139648	0.02	9.79693	4.76833	19.5939	6.39146
1093	254.541	1	0.000456335	698.955	25.0174	0.586001	67.7864	0.355027	21.9203	0.668101	0.49	3.50453	5.46049	7.00906	7.59258
1094	487.802	1	0	706.485	36.6757	0.557889	47.0316	0.67417	37.2364	0.163258	0.02	9.80083	4.85678	19.6017	6.34789
1095	192.265	1	0	3357.64	35.9062	0.42332	111.446	0.0569208	14.8156	0.351505	0.09	7.88768	5.73098	15.7754	7.70254
1096	551.503	1	0	942.985	37.8746	0.562126	83.7189	0.571971	48.2169	0.22387	0.08	8.32218	5.66656	16.6444	7.92214
1097	301.816	1	0.00802451	450.736	15.5224	0.259551	115.683	0.65169	23.6433	0.827935	0.77	1.56524	4.07152	3.13048	6.1378
1098	202.544	1	0	1223.94	39.3137	0.44099	53.4838	0.161928	49.8842	0.452634	0.27	6.21292	6.14959	12.4258	9.20918
1099	537.508	1	0	1004.65	34.7463	0.431308	94.7293	0.52487	29.472	0.31959	0.11	7.66085	5.76539	15.3217	7.80305
1100	175.351	1	0	1440.22	31.7578	0.891108	67.1128	0.119954	21.7759	0.540262	0.31	5.07857	5.8939	10.1571	8.21581
1101	570.861	1	0	1327.6	36.5454	0.782146	110.327	0.42425	26.5347	0.139989	0.05	9.28441	5.08637	18.5688	7.19948
1102	451.849	1	0	882.964	33.7852	0.476259	78.8765	0.500275	24.7991	0.32192	0.17	6.77367	5.94881	13.5473	8.27081
1103	155.326	1	3.30333	627.067	8.8217	0.178098	114.098	0.244659	29.0361	0.932542	0.9	0.627974	2.74866	1.25595	3.79341
1104	342.402	1	0.0477679	566.836	14.8862	0.292709	125.529	0.592823	8.90119	0.84751	0.69	2.0716	4.53125	4.1432	6.52848
1105	224.898	1	2.12352	354.119	9.63445	0.158914	88.2777	0.621182	13.9595	0.935586	0.86	0.905448	3.19394	1.8109	4.69103
1106	200.739	1	0	1104.84	36.181	0.507887	46.9353	0.177906	25.2189	0.433242	0.23	6.33824	6.14642	12.6765	8.67479
1107	225.315	1	0.0064057	403.02	21.4499	0.393378	50.8039	0.536732	37.8182	0.747826	0.65	2.33951	4.86315	4.67902	6.78145
1108	215.2	1	0.000461123	1306.1	26.3176	0.623376	98.1788	0.162454	29.9513	0.683171	0.42	3.86617	5.68188	7.73235	7.21915
1109	199.095	1	0.0612878	290.967	12.9477	0.186322	71.3195	0.659626	33.9614	0.909414	0.84	1.04223	3.43998	2.08445	4.9971
1110	279.539	1	0.000586601	1003.64	26.029	0.433669	110.139	0.273302	34.9445	0.663398	0.51	3.42337	5.46865	6.84674	7.68552
1111	144.223	1	0.00152411	242.41	17.0217	0.273922	26.7405	0.563274	25.2062	0.828922	0.73	1.69318	4.22652	3.38636	5.74026
1112	166.589	1	0.00705301	612.997	19.2305	0.302045	73.3272	0.265051	32.715	0.88449	0.72	1.85478	4.3671	3.70957	6.36006
1113	526.239	1	0	1071.93	34.3199	0.707427	117.277	0.481319	42.0813	0.437546	0.2	6.45994	6.13408	12.9199	8.35202
1114	237.979	1	0	2541.96	38.8199	0.463578	114.897	0.0927252	36.2192	0.331874	0.18	7.14337	5.84073	14.2867	8.73824
1115	162.024	1	0	695.885	34.0819	0.515019	26.195	0.225489	18.514	0.484849	0.28	5.7103	6.00055	11.4206	8.56272
1116	130.846	1	0.00232509	203.999	16.3865	0.327697	26.3769	0.600765	45.7471	0.865554	0.8	1.2932	3.70536	2.58641	5.45091
1117	186.628	1	0.00386928	362.457	16.1181	0.220789	66.7961	0.496473	44.927	0.901991	0.8	1.33416	3.81996	2.66832	5.60696
1118	323.414	1	0.01664	597.025	18.5715	0.280777	128.397	0.528807	32.2324	0.861514	0.7	2.00261	4.45578	4.00521	6.57792
1119	417.111	1	0.0021889	633.921	23.9978	0.873341	102.573	0.640676	37.8882	0.652254	0.48	3.43561	5.41604	6.87122	7.18208
1120	148.849	1	0.000569329	624.317	13.6567	0.331925	102.122	0.234215	20.4997	0.90278	0.81	1.22442	3.68984	2.44885	5.22414
1121	73.7721	1	6.03475	962.613	6.2006	0.0415314	133.201	0.0761917	28.6958	0.967481	0.95	0.315713	1.97909	0.631426	2.7698
1122	215.072	1	0	626.992	35.5597	0.595019	23.9624	0.332094	25.5483	0.311821	0.1	7.46333	5.90994	14.9267	7.50655
1123	392.149	1	0	1057.06	38.4361	0.492501	65.3596	0.363617	39.9872	0.18769	0.09	8.51553	5.58838	17.0311	7.81832
1124	336.984	1	0	711.892	29.9568	0.351369	65.0757	0.460344	16.059	0.676233	0.37	4.91099	5.93386	9.82199	8.84159
1125	119.035	1	0	1186.11	26.4894	0.494947	52.1795	0.0987589	20.8082	0.756317	0.45	3.64758	5.55768	7.29517	7.28912
1126	156.637	1	0	1912.41	31.1472	0.626706	85.1018	0.0809904	26.4742	0.610113	0.34	4.76797	5.95231	9.53594	7.97394
1127	390.68	1	0	1128.43	36.3328	0.785339	58.9525	0.341336	17.5988	0.10911	0.02	10.0996	4.67928	20.1993	6.41274
1128	409.67	1	0.000375102	939.703	25.4569	0.594503	138.454	0.42777	42.6524	0.756329	0.44	3.73691	5.55488	7.47383	7.30445
1129	299.635	1	0.00743919	519.789	17.889	0.306525	108.308	0.561269	40.7742	0.845406	0.7	1.91262	4.41932	3.82525	6.06957
1130	103.512	1	0	719.903	29.7994	0.859663	22.3331	0.139727	15.1009	0.606611	0.38	4.44177	5.84354	8.88355	7.91367
1131	304.678	1	0.0274015	491.689	19.6139	0.481378	68.3067	0.602742	11.7366	0.747658	0.56	2.90862	5.14444	5.81723	6.9638
1132	325.554	1	0	1045.15	38.1076	0.430961	55.7214	0.305149	28.6116	0.24185	0.1	8.19455	5.63498	16.3891	8.11644
1133	225.301	1	0	321.367	27.7386	0.707377	25.7438	0.65904	34.5493	0.737128	0.49	3.62177	5.57445	7.24354	7.87735
1134	316.852	1	0.0105768	547.434	21.9642	0.492163	93.9863	0.561275	46.7335	0.784627	0.64	2.43879	4.84325	4.87758	7.00871
1135	145.182	1	0.00292948	623.426	15.843	0.331063	92.5859	0.22804	29.4965	0.887638	0.81	1.31011	3.84824	2.62023	5.69114
1136	565.985	1	0	1409.78	38.7621	0.753129	108.928	0.396143	44.6862	0.150139	0.05	9.90132	4.67188	19.8026	7.01981
1137	29.6471	1	0.00084889	1173.56	19.4488	0.404962	27.879	0.0249211	19.3799	0.859039	0.73	1.68547	4.20522	3.37094	5.71527
1138	126.077	1	0	2400.97	29.9934	0.636241	108.144	0.0520254	40.1541	0.67446	0.46	3.79895	5.63834	7.5979	7.88094
1139	335.936	1	0	558.102	31.5384	0.599755	47.5088	0.579977	33.5514	0.436748	0.3	5.20883	5.92824	10.4177	8.21587
1140	193.387	1	4.59552	567.025	7.34315	0.0013757	135.682	0.337189	36.0611	0.970754	0.92	0.492981	2.42496	0.985963	3.36589
1141	696.333	1	0	1231.18	35.6922	0.753439	133.348	0.55728	39.1449	0.230586	0.06	8.67784	5.51076	17.3557	7.2175
1142	449.645	1	0	1589.46	36.8861	0.549636	128.163	0.279061	25.8426	0.2753	0.16	7.53552	5.91566	15.071	8.73212
1143	373.527	1	0	1705.3	36.6737	0.472185	127.292	0.216106	35.0773	0.562604	0.2	6.76304	6.10898	13.5261	8.79786
1144	210.199	1	2.68828	375.142	8.46651	0.112575	89.706	0.549738	21.7105	0.965696	0.88	0.716453	2.85555	1.43291	3.91838
1145	194.417	1	0	3848.1	37.6498	0.586568	100.815	0.0502953	19.9164	0.110194	0.02	10.1198	4.51349	20.2395	6.23901
1146	182.076	1	0	534.435	31.1507	0.673545	26.3615	0.327556	41.1835	0.519576	0.31	4.86164	5.94954	9.72327	7.59631
1147	280.564	1	0	3780.1	36.3181	0.814071	135.45	0.0739291	9.6907	0.0344187	0.03	10.6836	4.05959	21.3673	6.13375
1148	82.9573	1	0.0120884	227.96	13.2825	0.227401	28.7565	0.346288	46.803	0.922315	0.87	0.84069	3.08205	1.68138	4.56212
1149	167.834	1	0	1272.52	29.5706	0.590366	67.192	0.129749	21.266	0.597864	0.41	4.28347	5.76133	8.56694	8.14667
1150	689.745	1	0	1279.16	38.4174	0.563896	127.343	0.531027	45.8548	0.165891	0.06	9.34702	5.05841	18.694	7.51584
1151	304.463	1	0	775.213	27.8864	0.447635	86.4527	0.382581	23.4377	0.663433	0.54	3.64305	5.53786	7.2861	8.7852
1152	238.627	1	0	671.129	34.6143	0.30432	33.8417	0.344245	34.9872	0.467278	0.19	6.2763	6.02959	12.5526	7.9909
1153	313.411	1	0	1081.58	29.5974	0.334255	118.171	0.284021	42.1419	0.653491	0.49	3.85157	5.66153	7.70313	8.54167
1154	533.72	1	0	873.157	32.3151	0.528033	110.104	0.596903	32.1361	0.421154	0.28	5.66188	6.07586	11.3238	8.68876
1155	292.766	1	0	585.702	36.8251	0.569239	38.6969	0.479247	44.0407	0.49716	0.3	5.81986	6.04126	11.6397	9.16583
1156	217.98	1	0	380.96	26.3108	0.615158	29.9764	0.544893	27.7729	0.686496	0.47	3.61382	5.50214	7.22765	7.53602
1157	155.244	1	0.000892751	236.907	24.1812	0.482313	17.2801	0.607135	45.2329	0.742498	0.59	2.69501	5.03841	5.39001	6.90041
1158	64.1266	1	0	1130.22	38.6797	0.597727	17.8164	0.055376	34.3339	0.521141	0.32	5.43882	6.00888	10.8776	8.92388
1159	151.173	1	0	1514.37	27.1371	0.505876	91.6751	0.0984995	32.5791	0.735021	0.51	3.37541	5.32674	6.75083	7.61587
1160	483.273	1	0	785.266	37.1807	0.440677	69.2777	0.598215	36.4863	0.35233	0.17	7.29415	5.96532	14.5883	8.73187
1161	456.139	1	0	1487.66	33.8268	0.523078	110.937	0.303097	10.1855	0.208932	0.09	8.28313	5.69299	16.5663	7.91903
1162	83.2943	1	2.94769	920.379	8.78763	0.102602	121.558	0.0897874	6.21874	0.918322	0.89	0.744814	2.97798	1.48963	4.40754
1163	103.139	1	0	977.762	22.9348	0.485581	51.0162	0.103618	42.661	0.715144	0.57	2.65995	5.03835	5.31989	6.25965
1164	274.495	1	0	4057.08	36.8458	1.04424	138.201	0.0674115	38.3249	0.01559	0	10.9984	3.63497	21.9967	5.09377
1165	306.496	1	0	632.316	34.1386	0.456108	41.4803	0.468591	21.5705	0.361668	0.24	6.18724	6.06289	12.3745	8.6802
1166	268.246	1	0	1619.24	35.7209	0.396582	88.187	0.1634	20.31	0.35877	0.21	6.65499	5.96308	13.31	8.78344
1167	126.904	1	0.0153839	1753.77	21.6852	0.720384	119.32	0.0716806	13.0747	0.851018	0.63	2.52686	4.93355	5.05371	7.19761
1168	181.701	1	0.00958081	607.879	18.1786	0.310436	72.3226	0.292134	15.8497	0.845668	0.69	2.04037	4.54127	4.08074	6.49996
1169	383.856	1	0	910.308	26.5346	0.764715	124.346	0.413059	27.9081	0.696766	0.48	3.7708	5.59608	7.54159	8.13636
1170	669.632	1	0	1125.04	36.8128	0.609381	108.962	0.585747	31.0678	0.156575	0.05	9.32066	5.191	18.6413	7.27276
1171	166.925	1	0.0196908	1241.27	18.7616	0.406752	116.491	0.132985	9.90771	0.823045	0.63	2.40543	4.77834	4.81085	6.72205
1172	538.1	1	0	1495.99	36.8782	0.38586	126.483	0.355028	40.0012	0.235779	0.06	8.60527	5.44872	17.2105	7.46865
1173	343.256	1	0	525.033	34.2435	0.547722	38.6001	0.627527	24.8264	0.415153	0.25	6.13895	6.06942	12.2779	8.72789
1174	137.171	1	0	528.369	26.5681	0.503903	31.8107	0.249889	37.7813	0.690141	0.57	3.00418	5.23979	6.00837	7.53686
1175	485.389	1	0.00484802	726.972	24.1475	0.625817	133.605	0.652354	33.6395	0.651979	0.48	3.53056	5.49631	7.06111	7.45335
1176	575.539	1	0	984.716	36.4776	0.522511	91.8507	0.57289	46.3844	0.208644	0.07	8.28491	5.71201	16.5698	7.51174
1177	577.67	1	0	1569.74	33.9147	0.625524	124.034	0.364737	10.4209	0.113268	0.02	9.9259	4.76577	19.8518	6.49331
1178	657.281	1	0	1156.75	35.0532	1.0111	94.262	0.561801	45.9979	0.022468	0.01	10.9245	3.47982	21.849	4.9036
1179	670.065	1	0	1005.7	33.6576	1.00893	82.2854	0.658755	26.2219	0.045014	0	11.092	3.21906	22.1841	4.59265
1180	131.798	1	0	2169.79	36.1839	0.364058	66.4153	0.0600638	23.2513	0.470556	0.27	5.83251	6.12697	11.665	8.78715
1181	686.271	1	0	1026.91	34.7614	0.647876	131.739	0.655276	40.4852	0.408203	0.14	7.18541	6.0174	14.3708	8.17988
1182	80.5302	1	0.000966115	2510.36	25.8175	0.500118	106.4	0.0318173	46.8574	0.763528	0.61	2.58038	4.96674	5.16076	7.09969
1183	248.423	1	0	1669.09	31.297	0.859402	97.7177	0.147092	25.1092	0.476748	0.22	5.74448	6.09293	11.489	7.61893
1184	179.373	1	4.78998	506.068	6.40445	0.0160535	139.572	0.350537	31.8663	0.959272	0.93	0.420986	2.22462	0.841972	3.09674
1185	162.686	1	0	1214.79	40.1037	0.560497	32.1315	0.131372	33.376	0.198933	0.09	8.26519	5.68451	16.5304	7.98892
1186	399.738	1	0.000653988	685.706	27.3951	0.602482	74.7391	0.568369	15.7154	0.549754	0.33	4.89752	6.05373	9.79504	7.99691
1187	599.811	1	0	909.496	33.5212	0.375685	117.299	0.644566	42.8282	0.469328	0.22	6.22663	6.09975	12.4533	8.39091
1188	271.75	1	0	2318.28	37.5469	0.580602	85.4661	0.116342	32.7408	0.0845399	0.01	10.022	4.63465	20.0439	6.16188
1189	405.497	1	0.019782	671.921	22.3096	0.563501	132.289	0.588743	32.0628	0.693254	0.61	2.73929	5.056	5.47859	7.4925
1190	195.998	1	0.00156933	1026.08	16.8783	0.388433	129.771	0.188684	14.1692	0.797754	0.66	2.09663	4.58531	4.19326	6.03988
1191	613.383	1	0	897.239	29.9203	0.416142	116.913	0.670726	9.38076	0.427563	0.25	6.32669	6.09294	12.6534	9.01922
1192	314.129	1	0	806.375	36.4427	0.706858	36.5304	0.381117	13.9717	0.207916	0.04	9.29297	5.18899	18.5859	7.18698
1193	100.268	1	0.00257156	1406.36	21.4504	0.476081	83.9388	0.0704488	30.6079	0.772553	0.64	2.27184	4.72486	4.54367	6.35522
1194	115.905	1	0.00897024	998.263	19.5946	0.545133	71.3007	0.114363	13.2445	0.799993	0.67	2.18593	4.69373	4.37186	6.62662
1195	322.052	1	0.00970384	491.514	17.9734	0.29269	107.198	0.637012	31.7479	0.812274	0.7	1.96094	4.43889	3.92187	6.37686
1196	424.6	1	0	637.036	37.6074	0.48148	47.101	0.643875	33.6458	0.337453	0.15	7.59937	5.88315	15.1987	8.55256
1197	561.355	1	0	1029.61	37.0924	0.231599	110.188	0.53328	45.3963	0.356565	0.2	7.02821	6.04104	14.0564	8.87341
1198	280.43	1	0.00797166	878.746	22.7321	0.648776	126.694	0.312887	44.7401	0.706021	0.61	2.60503	4.93315	5.21006	7.04887
1199	215.822	1	0	2036.55	33.355	0.516198	93.4333	0.104913	14.47	0.448753	0.21	6.37963	6.06574	12.7593	8.26285
1200	87.7353	1	0	1452.41	33.2711	0.54706	41.2322	0.0593867	39.3079	0.630423	0.43	4.16206	5.72137	8.32412	8.37336
1201	603.473	1	0	1451.33	35.15	0.488171	127.917	0.411104	32.8155	0.169223	0.01	9.27325	5.23501	18.5465	6.50879
1202	295.642	1	0	576.138	38.105	0.936696	21.9482	0.498044	40.8674	0.0325786	0.02	10.3181	4.27617	20.6361	6.02324
1203	698.591	1	0	1306.29	37.2467	0.583309	138.388	0.526947	24.3336	0.207913	0.09	8.90073	5.49609	17.8015	8.17771
1204	679.632	1	0	1479.65	38.7268	0.822094	139.948	0.453406	39.4537	0.152798	0.06	9.7167	4.89395	19.4334	7.44832
1205	166.711	1	0.00990241	620.643	20.8363	0.375987	67.5511	0.261542	37.0417	0.811621	0.7	2.03197	4.51438	4.06395	6.66214
1206	513.82	1	0	796.734	37.3258	0.768376	60.0575	0.629819	20.4875	0.229677	0.08	9.11911	5.29505	18.2382	7.82513
1207	329.743	1	0.000817746	580.681	25.5142	0.655158	71.8419	0.550379	32.6029	0.729213	0.49	3.53732	5.50907	7.07465	7.59473
1208	300.931	1	0	2058.02	35.9232	0.604445	92.6418	0.144972	12.1882	0.14445	0.06	9.07932	5.25809	18.1586	7.28687
1209	228.869	1	0.00232856	885.087	24.7051	0.584213	100.671	0.253061	36.9002	0.763085	0.63	2.69526	5.04007	5.39051	7.71883
1210	41.4723	1	0.586899	493.752	11.2361	0.113888	29.6003	0.0823707	9.22786	0.922576	0.88	0.78581	2.99707	1.57162	4.47324
1211	445.655	1	0	681.607	26.0399	0.457264	109.862	0.636401	35.8661	0.590656	0.48	3.68663	5.61746	7.37325	7.88914
1212	182.321	1	5.94233	429.501	5.36348	0.0238987	106.834	0.419769	39.9391	0.945749	0.95	0.30834	1.93862	0.616681	2.71337
1213	134.981	1	0	5991.61	38.2196	0.693709	133.159	0.0224472	31.6355	0.237411	0.06	8.28999	5.63998	16.58	7.2427
1214	399.362	1	0	664.503	33.8172	0.252734	56.277	0.582328	24.8797	0.453689	0.23	6.25905	6.02326	12.5181	8.63276
1215	239.658	1	0	1651.15	38.2134	0.404984	65.3742	0.143251	29.3295	0.252185	0.09	8.18353	5.63411	16.3671	7.85229
1216	257.944	1	0	560.111	31.1683	0.446004	30.6683	0.445662	9.43906	0.503556	0.2	6.24512	6.00778	12.4902	8.22797
1217	247.278	1	0	638.337	33.1768	0.434832	43.2594	0.373603	48.3603	0.602626	0.37	4.82067	5.95072	9.64134	8.4965
1218	42.8829	1	0	3752.81	43.0107	0.342957	33.1325	0.0113368	39.4615	0.443316	0.23	6.60125	6.03421	13.2025	8.97395
1219	27.2504	1	0	7676.8	26.6398	0.513404	109.24	0.00353983	30.9936	0.761854	0.6	2.61602	4.89215	5.23203	6.87143
1220	114.738	1	0	1286.95	39.9383	0.541719	19.6844	0.0878115	22.4247	0.0593888	0.03	10.1211	4.53256	20.2422	6.57239
1221	231.087	1	0	1738.4	38.5781	0.698266	52.5033	0.131581	34.8208	0.109439	0.02	10.3749	4.32122	20.7498	6.09981
1222	200.885	1	0.00759461	290.999	21.3561	0.59424	27.8578	0.654493	18.6324	0.751316	0.59	2.71155	5.06985	5.42311	6.88484
1223	343.205	1	0	752.277	30.9295	0.426706	57.348	0.445042	10.5344	0.446993	0.25	6.01611	6.07212	12.0322	8.65174
1224	449.558	1	0	945.38	30.6313	0.418561	69.7872	0.468498	6.12505	0.282697	0.06	8.21906	5.58882	16.4381	7.1845
1225	398.618	1	0	1149.1	30.4904	0.610102	98.8885	0.341546	12.9659	0.476899	0.2	6.24738	6.00612	12.4948	8.11315
1226	22.0262	1	0	12194.1	33.6332	0.696057	97.7298	0.00180243	13.6578	0.702804	0.5	3.75675	5.64503	7.5135	8.5853
1227	209.522	1	0.0136327	978.743	20.0842	0.377174	118.223	0.210753	19.165	0.833027	0.65	2.33414	4.77976	4.66828	6.89041
1228	127.234	1	0.0375082	453.971	12.5453	0.163507	79.8302	0.273843	48.3229	0.882618	0.84	0.946934	3.2279	1.89387	4.37406
1229	94.9937	1	0.294721	526.284	11.5994	0.0277904	71.9781	0.177063	48.6876	0.947384	0.87	0.778716	2.97062	1.55743	4.06365
1230	312.959	1	0	519.749	35.4337	0.421798	32.2605	0.577485	22.045	0.387617	0.21	6.62422	6.05523	13.2484	8.75346
1231	270.016	1	0	1690.23	38.2061	0.380262	90.898	0.157455	46.3008	0.345842	0.2	6.77908	6.19063	13.5582	8.70765
1232	540.44	1	0	842.004	27.8976	0.704786	120.664	0.628576	38.6657	0.543752	0.27	5.05927	5.9364	10.1185	7.29658
1233	339.284	1	0	975.328	40.9879	0.574619	49.9177	0.339768	44.9427	0.230069	0.1	8.86964	5.34463	17.7393	8.19504
1234	311.83	1	0	1267.59	33.5931	0.461075	86.2573	0.241947	24.4933	0.44759	0.22	6.17389	5.99838	12.3478	8.36717
1235	138.716	1	5.39865e-05	705.231	25.9961	0.598804	40.116	0.191404	46.8666	0.738628	0.49	3.25048	5.32324	6.50095	6.92178
1236	156.998	1	0	2003.44	25.7931	0.689313	101.65	0.0776895	9.25183	0.618209	0.39	4.20229	5.71609	8.40458	7.58838
1237	112.693	1	0	1060.52	14.7158	0.176365	129.166	0.105053	38.1931	0.883695	0.79	1.25305	3.67897	2.5061	4.90248
1238	429.294	1	0	1275.39	31.7243	0.553544	125.437	0.331415	25.9345	0.482084	0.24	5.88717	6.00739	11.7743	8.21556
1239	209.365	1	0	926.813	28.6574	0.561726	65.2683	0.220965	26.3109	0.650945	0.44	3.98366	5.66151	7.96733	8.10693
1240	77.0581	1	2.20515	389.28	9.77443	0.152416	29.371	0.193781	7.9274	0.955866	0.86	0.860003	3.1483	1.72001	4.29296
1241	330.581	1	0.0200755	728.948	22.1637	0.665974	89.836	0.444372	11.0726	0.689845	0.47	3.59164	5.46497	7.18328	7.45995
1242	178.368	1	0.00334961	771.77	16.3854	0.371583	118.277	0.227213	43.9781	0.834995	0.74	1.56548	3.98522	3.13095	5.39155
1243	499.749	1	0	949.119	33.5724	0.554424	105.124	0.514885	40.6921	0.409407	0.24	6.04403	6.0462	12.0881	8.43753
1244	154.503	1	0	1726.1	39.5664	0.833436	34.4368	0.0885567	39.3843	0.113557	0.02	10.4956	4.17925	20.9913	6.01846
1245	110.631	1	7.9476	388.202	3.7644	0.0191648	73.7335	0.282488	30.6396	0.967916	0.97	0.183852	1.49637	0.367704	2.10538
1246	109.714	1	0.0066297	300.937	18.9488	0.310902	25.885	0.34655	28.5652	0.796233	0.76	1.64885	4.1927	3.2977	6.23984
1247	370.865	1	0	553.083	29.763	0.759278	57.9615	0.646675	28.7551	0.571077	0.37	4.67524	5.89141	9.35049	8.35654
1248	144.68	1	0	1795.6	39.2272	0.497616	43.7112	0.0795493	27.2262	0.243649	0.1	8.03786	5.71862	16.0757	7.94686
1249	147.526	1	3.89209	239.085	5.69068	0.0336945	19.0929	0.603159	27.4305	0.926574	0.93	0.377049	2.00102	0.754097	2.78593
1250	494.685	1	0	838.28	33.5616	0.437704	88.5644	0.575665	18.0659	0.452437	0.27	6.25699	6.07268	12.514	9.28449
1251	509.526	1	0	1287.2	35.2601	0.567782	99.507	0.390547	14.2563	0.189178	0.07	8.90821	5.4187	17.8164	7.59822
1252	145.404	1	0	1411.33	30.2266	0.525745	68.2171	0.101437	25.8644	0.673475	0.45	4.05731	5.70601	8.11462	8.26647
1253	253.52	1	0	828.316	38.8948	0.414401	32.4464	0.298284	31.4816	0.210229	0.07	8.64039	5.48167	17.2808	7.69588
1254	410.317	1	0	1472.21	35.0891	0.880226	75.687	0.276191	31.1504	0.0127475	0	10.8344	3.67168	21.6688	4.94066
1255	348.605	1	0	528.837	33.9597	0.499524	30.7342	0.637413	16.4306	0.227212	0.07	7.94547	5.64534	15.8909	7.36457
1256	214.754	1	0	1744.63	28.7678	0.508891	137.686	0.121603	36.0999	0.605285	0.5	3.68245	5.53085	7.36491	8.16317
1257	238.583	1	0.00464662	340.844	14.3556	0.551198	87.0073	0.67639	40.585	0.888529	0.81	1.23449	3.62132	2.46899	5.31101
1258	188.864	1	0	1564.09	37.2153	0.423195	45.7818	0.119244	11.1258	0.21517	0.08	8.72855	5.39202	17.4571	7.72367
1259	589.271	1	0	1206.71	37.0732	0.502959	103.107	0.48097	34.7438	0.184882	0.05	9.30493	5.04055	18.6099	7.15215
1260	373.157	1	0	1670.89	34.3811	0.605089	103.558	0.220939	15.2849	0.303056	0.08	8.1595	5.81657	16.319	7.51354
1261	276.041	1	0.0208016	427.151	19.374	0.471345	67.1823	0.624661	19.8026	0.769103	0.66	2.3098	4.80569	4.6196	6.87896
1262	192.888	1	0.00114656	499.846	14.6845	0.124869	116.962	0.376493	47.2434	0.918586	0.84	1.10118	3.52336	2.20236	5.35779
1263	212.692	1	0	1265.22	35.5287	0.431914	52.5579	0.165268	18.6318	0.311453	0.17	6.89536	6.11369	13.7907	8.31224
1264	379.665	1	0	989.375	28.3047	0.485253	96.1788	0.376962	11.5075	0.53167	0.31	5.25554	5.98648	10.5111	8.38309
1265	284.667	1	0	1232.87	37.9434	0.487541	55.5266	0.227046	19.9598	0.259497	0.1	8.51384	5.40097	17.0277	8.0104
1266	520.846	1	0.00583559	865.87	25.3465	0.370722	133.817	0.590423	9.6616	0.598316	0.41	4.5295	5.83628	9.059	8.79403
1267	480.571	1	0	1080.09	36.5702	0.737892	74.7908	0.437698	15.3377	0.1798	0.06	9.35234	5.19253	18.7047	7.55603
1268	340.76	1	0	1305.55	40.5262	0.638973	61.6559	0.256864	32.9096	0.129702	0.07	9.72725	4.96148	19.4545	7.62841
1269	357.842	1	0	968.237	36.3601	0.502052	73.2727	0.360746	27.0243	0.393416	0.27	6.32265	6.08004	12.6453	9.34994
1270	330.401	1	0	2188.82	30.5902	0.50084	137.174	0.149837	10.0646	0.303371	0.11	7.16877	5.92946	14.3375	7.24648
1271	358.338	1	0.0303505	565.118	17.4184	0.566225	110.087	0.620367	11.6126	0.812487	0.63	2.45741	4.86969	4.91483	6.83419
1272	216.64	1	0	619.555	36.7759	0.44983	18.8361	0.339905	18.5963	0.175046	0.02	9.48862	5.06624	18.9772	6.54501
1273	53.0532	1	1.31843	916.139	10.4187	0.106729	76.7766	0.0573448	10.5007	0.914691	0.89	0.727646	2.89452	1.45529	4.31269
1274	396.7	1	0	762.751	32.0061	0.591792	51.0032	0.509348	5.79701	0.187553	0.1	7.95902	5.79077	15.918	8.06776
1275	431.281	1	0	1542.47	37.8072	0.300081	98.6725	0.276102	44.8805	0.16806	0.04	9.11973	5.22078	18.2395	7.07829
1276	375.774	1	0	964.907	28.5044	0.630299	109.167	0.381693	21.4121	0.603746	0.4	4.45934	5.92512	8.91868	8.49499
1277	314.537	1	0	824.677	28.5355	0.678927	84.4157	0.372235	42.158	0.599862	0.42	4.10807	5.76071	8.21615	7.85773
1278	361.687	1	0	1508.81	35.0717	0.526719	122.43	0.23611	48.8537	0.458856	0.25	6.01415	6.07632	12.0283	8.48998
1279	503.607	1	0	1439.43	36.4479	0.489022	125.097	0.344883	27.6222	0.243426	0.12	7.82493	5.76912	15.6499	8.3349
1280	373.614	1	0	2050.65	40.2618	0.517674	131.498	0.180043	37.6285	0.265839	0.16	7.88708	5.85043	15.7742	9.0505
1281	349.723	1	0	1282.91	36.4501	0.905447	58.03	0.269344	16.1359	0.0647194	0.03	10.4646	4.09372	20.9291	6.12028
1282	358.763	1	0	1088.64	39.5203	0.580079	57.9582	0.323193	42.3192	0.177193	0.07	9.05305	5.30459	18.1061	7.63438
1283	58.0739	1	0.0140427	196.938	12.828	0.130074	18.5475	0.278941	19.7672	0.913496	0.89	0.787267	2.99832	1.57453	4.81151
1284	229.685	1	2.42616	439.989	9.55999	0.0797771	81.0435	0.511019	48.5915	0.945406	0.89	0.685202	2.85337	1.3704	3.92648
1285	206.944	1	0	622.586	37.3113	0.513661	19.7769	0.32204	7.40269	0.243147	0.11	8.64625	5.55549	17.2925	8.40009
1286	433.373	1	0	1080.2	37.075	0.731751	60.4417	0.395279	36.9642	0.0215732	0.02	10.4533	4.08212	20.9067	5.89054
1287	233.88	1	0	957.947	32.8979	0.417156	66.6155	0.238202	47.9592	0.609264	0.41	4.495	5.9152	8.99	8.66577
1288	421.766	1	0	616.665	30.2153	0.295093	71.8431	0.661818	28.8329	0.595459	0.37	4.79877	5.87039	9.59754	8.57206
1289	331.245	1	0.0453081	513.279	19.693	0.286898	102.519	0.626637	24.5682	0.823619	0.7	2.18226	4.69595	4.36452	7.18417
1290	89.4875	1	0.000658837	230.691	15.6464	0.320494	18.912	0.367496	19.6329	0.852358	0.77	1.41565	3.85616	2.83131	5.35538
1291	160.327	1	0.00793846	721.339	21.8892	0.413718	60.5026	0.217208	20.469	0.723084	0.62	2.55208	4.91392	5.10415	6.99633
1292	151.43	1	0	444.977	31.0536	0.754343	17.7316	0.324893	21.2946	0.560945	0.31	4.96987	5.95691	9.93973	7.89467
1293	102.261	1	0	5834.24	40.3752	0.684304	78.4111	0.017469	25.4257	0.08119	0.04	10.3881	4.13805	20.7762	6.37641
1294	455.204	1	0	916.723	36.9954	0.399955	56.443	0.487457	32.6271	0.0777645	0.02	9.94214	4.68595	19.8843	6.40476
1295	195.694	1	0	699.96	31.6189	0.53838	34.7373	0.271385	11.9647	0.462186	0.33	5.24342	6.08666	10.4868	8.82106
1296	131.651	1	7.02559	484.312	4.73047	0.0580623	72.1241	0.269421	41.0453	0.971627	0.96	0.240222	1.68647	0.480444	2.36654
1297	149.809	1	4.22248	499.841	5.68004	0.0335019	137.844	0.296688	39.4437	0.981541	0.94	0.333694	1.92185	0.667388	2.68317
1298	369.49	1	0	1104.3	37.5464	0.46225	67.8429	0.328238	47.0649	0.320659	0.09	8.08228	5.74586	16.1646	7.65538
1299	120.569	1	0	316.244	26.3774	0.346402	17.7014	0.35768	48.0627	0.78269	0.6	2.76829	5.10135	5.53658	7.36489
1300	199.29	1	0.00647519	665.482	23.8336	0.385767	63.8787	0.291447	29.7472	0.792476	0.6	2.75959	5.16496	5.51918	7.36924
1301	424.028	1	0	1444.81	37.2956	0.622923	100.678	0.289305	23.5279	0.222054	0.11	8.21722	5.7252	16.4344	8.28915
1302	529.276	1	0	1613.46	37.568	0.797551	112.888	0.324605	48.2125	0.0917016	0.02	10.2542	4.16346	20.5084	6.18412
1303	140.102	1	0.162466	484.982	11.8958	0.162302	103.276	0.282906	40.1277	0.938248	0.87	0.830234	3.04105	1.66047	4.48779
1304	83.5019	1	0	2772.21	33.3527	0.568505	69.5201	0.0298592	35.7247	0.67855	0.38	4.52166	5.94777	9.04332	8.13559
1305	458.426	1	0	766.325	34.7721	0.595094	79.9257	0.580722	33.9299	0.512503	0.3	5.845	6.07311	11.69	9.21975
1306	158.381	1	0	470.014	29.1075	0.552738	24.7303	0.322416	29.2957	0.622215	0.44	3.94535	5.67306	7.8907	7.89262
1307	179.551	1	0.0117475	787.417	22.2298	0.596906	64.3869	0.223387	14.4546	0.715869	0.56	2.93902	5.19684	5.87805	7.17605
1308	69.4589	1	1.46922	716.408	8.30335	0.0447599	92.2226	0.0959075	34.6403	0.967817	0.92	0.471757	2.33246	0.943513	3.23823
1309	279.804	1	0	1179.25	35.2851	0.478422	77.5775	0.232566	49.8075	0.520364	0.27	5.71085	5.99434	11.4217	8.55552
1310	188.845	1	0	657.864	32.6901	0.347346	31.4574	0.277678	17.5502	0.559661	0.33	5.2332	6.02462	10.4664	8.72909
1311	192.376	1	0	2856.58	37.997	0.364093	108.266	0.0667788	24.5535	0.383601	0.2	6.89473	6.01118	13.7895	8.84012
1312	9.31615	1	0	8153.45	41.1897	0.567645	21.2286	0.00113822	39.0523	0.587458	0.36	4.88273	5.96364	9.76546	8.61958
1313	312.54	1	0.0167163	566.808	23.8748	0.469591	78.7832	0.534493	23.8842	0.739149	0.59	2.97073	5.25059	5.94145	7.91094
1314	254.89	1	0.00149991	944.653	24.0894	0.674777	107.573	0.264758	40.3035	0.713907	0.55	3.00693	5.25287	6.01387	7.13593
1315	271.373	1	0	2074.99	37.3241	0.823352	79.3417	0.129655	17.9837	0.110762	0.04	9.63823	4.76279	19.2765	6.85874
1316	616.008	1	0	902.718	35.4612	0.710034	81.237	0.669739	18.5062	0.15768	0.05	9.20308	5.18589	18.4062	7.29854
1317	305.064	1	0	1531.22	31.5607	0.34977	131.428	0.196413	28.8015	0.566488	0.38	4.79991	5.99473	9.59983	8.73372
1318	341.432	1	0	1017.15	35.8393	0.427688	66.8933	0.328597	21.7086	0.411784	0.2	6.96185	6.06499	13.9237	8.73585
1319	328.318	1	0	605.04	30.234	0.470144	59.4538	0.524108	45.2703	0.635265	0.39	4.42064	5.81912	8.84129	8.15175
1320	692.634	1	0	1339.47	36.4602	0.680952	132.935	0.510395	20.369	0.151339	0.06	9.43643	5.10351	18.8729	7.52873
1321	429.102	1	0	754.208	31.3066	0.458246	75.7509	0.554316	20.2388	0.488583	0.27	5.70202	6.0458	11.404	8.54496
1322	405.18	1	0	2146.96	39.0236	0.749717	109.029	0.18721	42.4884	0.0425349	0.04	10.8422	3.85997	21.6843	6.14554
1323	51.4905	1	0.000131723	816.489	25.6131	0.58286	18.1473	0.0615986	13.1022	0.695956	0.53	3.09953	5.2682	6.19906	7.17136
1324	503.444	1	0	1958.15	36.1989	0.639948	126.728	0.255142	36.1705	0.039333	0	10.5749	4.05693	21.1498	5.59561
1325	249.689	1	0	1157.35	36.7459	0.764604	37.3091	0.212835	25.2962	0.0507899	0	10.4672	4.17226	20.9345	5.6453
1326	256.367	1	0.0430475	407.862	14.1297	0.316063	78.873	0.612634	8.31331	0.85508	0.74	1.76201	4.31598	3.52403	6.32279
1327	286.882	1	0	2386.91	35.2582	0.595318	112.655	0.119254	10.1125	0.286702	0.1	8.2617	5.60156	16.5234	7.96519
1328	250.258	1	0	1522.26	37.8586	0.469957	75.0753	0.161829	46.2392	0.348449	0.18	6.84251	6.00142	13.685	8.4589
1329	295.989	1	0	482.949	32.5345	0.491826	24.312	0.592071	5.76759	0.339689	0.12	7.78096	5.78025	15.5619	8.04631
1330	93.4762	1	0.00202681	231.532	13.6675	0.263826	20.809	0.385498	9.70113	0.890821	0.78	1.35913	3.78981	2.71826	5.2521
1331	332.297	1	0	534.069	37.0955	0.5306	23.8903	0.602584	46.2213	0.0948645	0.01	9.85522	4.65018	19.7104	6.01878
1332	123.742	1	4.64668	714.691	7.8413	0.0386586	75.9332	0.171367	40.8406	0.921829	0.93	0.451854	2.38161	0.903708	3.31496
1333	348.669	1	0.00377962	510.902	21.2012	0.479034	91.2498	0.661702	49.262	0.753189	0.6	2.5876	5.05367	5.1752	6.55771
1334	265.813	1	0	1602.02	39.8955	0.437539	76.8566	0.163379	42.1627	0.340206	0.16	7.47361	5.93015	14.9472	8.79335
1335	103.105	1	0	638.94	35.7222	0.567449	17.016	0.15517	47.7784	0.57023	0.32	5.09972	6.04183	10.1994	8.34673
1336	701.485	1	0	1549.37	33.2788	0.887271	137.778	0.449323	11.7918	0.0281351	0	10.7243	3.98418	21.4486	5.45695
1337	219.761	1	0	472.98	27.4166	0.827678	32.1856	0.44677	11.009	0.65334	0.43	4.25388	5.84105	8.50775	8.4201
1338	240.032	1	0.647077	448.168	11.3033	0.306072	98.6924	0.525598	7.69675	0.865043	0.78	1.39493	3.89653	2.78986	5.47888
1339	368.853	1	0	639.316	35.0424	0.626242	44.1986	0.558696	27.3716	0.359581	0.15	7.07742	5.96964	14.1548	8.12023
1340	52.4187	1	2.84932	905.884	8.57993	0.0337241	52.9331	0.0573275	28.4696	0.970886	0.92	0.481666	2.37279	0.963332	3.29369
1341	410.072	1	0	2068.65	35.5364	0.696769	126.809	0.196582	25.9542	0.222842	0.03	9.08751	5.11623	18.175	6.68924
1342	352.593	1	0	1580.78	34.876	0.58898	135.188	0.219749	37.4018	0.518486	0.32	5.5643	6.02578	11.1286	9.11066
1343	233.598	1	0	577	27.3779	0.845097	43.6028	0.391823	22.1595	0.575218	0.41	4.0983	5.69358	8.1966	7.77645
1344	43.6996	1	0.067071	462.491	12.5021	0.0569786	31.932	0.092299	44.3587	0.936888	0.87	0.774804	2.95837	1.54961	4.04717
1345	386.932	1	0	586.704	35.711	0.61829	29.5459	0.642856	8.50435	0.0563545	0.05	10.2596	4.43821	20.5192	6.71554
1346	108.761	1	0	2953.7	39.9484	0.390793	71.0495	0.03648	48.1736	0.423804	0.26	6.13626	6.13251	12.2725	8.95476
1347	261.116	1	0.0250346	478.303	13.8271	0.313198	129.526	0.533369	20.9246	0.928825	0.82	1.28529	3.77501	2.57058	5.79239
1348	148.635	1	0	1205.75	32.5394	0.425291	45.4608	0.12107	13.6709	0.522593	0.31	5.30381	5.98232	10.6076	8.62882
1349	460.082	1	0	1911.97	32.3847	0.472739	139.801	0.238725	9.9554	0.188569	0.05	8.55117	5.48559	17.1023	7.01551
1350	327.42	1	0	509.466	27.415	0.462356	59.2081	0.618411	30.8948	0.679131	0.49	3.71368	5.65042	7.42736	8.22113
1351	178.164	1	0	1031.66	40.2512	0.582137	26.3342	0.169168	38.795	0.115191	0.05	9.36587	5.00685	18.7317	7.15466
1352	353.858	1	0	683.541	26.7091	0.383161	82.627	0.503751	25.4281	0.720692	0.46	3.90212	5.66515	7.80424	8.06098
1353	245.85	1	0.010084	798.788	22.9514	0.396817	108.918	0.300944	41.4107	0.738041	0.66	2.40582	4.84878	4.81164	7.32107
1354	337.045	1	0	874.187	37.732	0.525674	49.4868	0.376164	49.7711	0.262787	0.09	7.95745	5.71835	15.9149	7.68937
1355	425.242	1	0	968.55	37.7074	0.798008	53.2729	0.431525	29.8527	0.0514365	0.03	10.4093	4.17039	20.8186	6.30261
1356	93.8938	1	0.00705196	1552.98	19.8901	0.544622	92.6486	0.0598581	15.0943	0.785778	0.67	2.13203	4.57907	4.26406	6.47613
1357	224.437	1	0	1544.62	29.3433	0.601651	89.1037	0.143554	10.3116	0.509095	0.3	5.26553	5.99333	10.5311	8.2369
1358	269.36	1	0	1030.08	27.9235	0.310091	94.5734	0.256504	15.2119	0.674099	0.49	3.94227	5.66873	7.88455	8.88698
1359	359.857	1	0	1545.12	35.1444	0.55597	91.3165	0.23012	17.3475	0.248976	0.07	8.24152	5.59933	16.483	7.56455
1360	144.724	1	4.08061	373.782	7.17928	0.0254337	34.4565	0.380219	29.0655	0.970479	0.92	0.477015	2.34839	0.95403	3.25974
1361	208.345	1	0	507.292	37.3312	0.498054	17.1959	0.394251	14.4422	0.284265	0.11	8.08239	5.76076	16.1648	8.14854
1362	139.22	1	0	2218.27	26.9951	0.371253	133.543	0.0621801	39.5525	0.775765	0.55	3.1386	5.33184	6.2772	7.55302
1363	119.781	1	0.0098598	681.28	19.6468	0.40765	42.9051	0.17214	9.04757	0.754477	0.6	2.54565	4.89882	5.09131	6.62009
1364	179.871	1	0	2015.85	38.9577	0.544994	54.9535	0.0883055	16.7411	0.203581	0.08	8.94514	5.25309	17.8903	7.74327
1365	527.867	1	0	978.518	37.1234	0.587772	71.5486	0.529873	43.8628	0.0798807	0.03	9.71372	4.6614	19.4274	6.5227
1366	418.039	1	0	1111.99	35.7502	0.597947	93.5401	0.368513	48.8348	0.433726	0.18	6.67319	6.10449	13.3464	8.29123
1367	449.314	1	0	780.205	29.3911	0.47163	86.1671	0.562551	9.71074	0.552298	0.34	5.44397	6.01213	10.8879	9.25125
1368	521.074	1	0	1229.96	32.5584	0.480313	136.654	0.4169	17.236	0.367816	0.25	6.32224	6.08708	12.6445	8.93221
1369	268.188	1	0.00579509	545.236	15.2682	0.393831	133.931	0.480982	35.8484	0.892121	0.77	1.46023	3.89029	2.92046	5.59979
1370	306.215	1	0	1322.73	37.4011	0.594907	62.4899	0.22807	19.3974	0.164507	0.07	8.74739	5.46736	17.4948	7.70114
1371	193.091	1	0	368.573	32.1558	0.284617	20.2996	0.492967	25.8589	0.620143	0.42	4.51914	5.94188	9.03828	8.7874
1372	55.0197	1	0	1696.62	32.836	0.586891	34.358	0.0319488	49.5982	0.603668	0.49	3.66667	5.52221	7.33335	8.0963
1373	106.427	1	2.20466	765.832	7.94827	0.0413331	129.278	0.13766	43.6309	0.935635	0.91	0.49094	2.27523	0.981881	3.1494
1374	219.669	1	0	1795.69	28.1703	0.651402	138.331	0.120954	46.7531	0.584344	0.43	3.86223	5.67665	7.72447	7.52559
1375	247.935	1	0.00356831	575.321	22.5638	0.544044	70.7977	0.41843	46.5228	0.782679	0.58	2.67352	5.00066	5.34704	6.73728
1376	369.292	1	0	1215.38	33.269	0.345929	114.604	0.298269	31.9246	0.554785	0.35	5.26637	6.11346	10.5327	9.03081
1377	176.929	1	0	3665.89	37.4506	0.894455	83.8877	0.048049	26.6327	0.0477571	0.02	10.5444	3.91552	21.0888	5.59245
1378	561.126	1	0	1071.9	34.9503	0.566252	123.071	0.513042	41.571	0.44558	0.2	6.56112	6.12466	13.1222	8.58972
1379	84.8078	1	0	1142.73	28.6362	0.466056	39.8232	0.0728073	48.1759	0.708114	0.52	3.27042	5.35572	6.54083	7.41746
1380	210.509	1	0.0268124	318.284	22.795	0.565623	27.7334	0.628663	10.6762	0.714112	0.56	3.11359	5.36519	6.22719	7.76995
1381	566.153	1	0	1486.42	33.7137	0.651006	111.109	0.377544	13.9648	0.0758479	0.01	10.2845	4.27246	20.5689	5.71349
1382	457.489	1	0	724.796	28.1715	0.8796	103.341	0.614568	38.8865	0.607293	0.41	4.27963	5.80987	8.55926	8.0361
1383	143.467	1	0.00557835	737.053	24.9295	0.434885	53.4608	0.189591	28.0802	0.737741	0.63	2.63139	4.98648	5.26278	7.67185
1384	137.271	1	0.00139073	245.224	21.0734	0.605322	19.4688	0.524183	45.0378	0.745214	0.65	2.21081	4.75214	4.42163	6.18254
1385	536.012	1	0	1361.02	35.824	0.555401	106.098	0.388909	11.5445	0.141783	0.08	9.30144	5.10432	18.6029	7.78752
1386	69.4501	1	0.00173806	1978.5	23.5152	0.345266	83.3662	0.0347676	34.7091	0.792603	0.67	2.23471	4.71749	4.46943	6.7629
1387	280.448	1	0	1550.81	38.9802	0.385322	85.153	0.177947	36.1407	0.391709	0.23	6.8847	6.04312	13.7694	9.18901
1388	636.938	1	0	1121.03	36.8309	0.548107	98.7457	0.559525	49.2155	0.126854	0.02	9.75473	4.76579	19.5095	6.44073
1389	142.205	1	0	645.099	32.9099	0.380885	20.888	0.213405	9.54565	0.526024	0.26	5.82424	6.06161	11.6485	8.61313
1390	296.316	1	0.0287601	465.244	17.4919	0.253128	96.4089	0.618664	26.9383	0.832931	0.72	1.88756	4.3715	3.77511	6.35964
1391	279.48	1	0	1624.34	35.8753	0.321108	95.8315	0.169648	38.1833	0.443731	0.21	6.39837	6.02383	12.7967	8.42881
1392	284.817	1	0	896.082	35.0951	0.560677	48.2379	0.310593	25.6907	0.404662	0.14	7.08231	5.97484	14.1646	7.93936
1393	358.545	1	0	1621.97	36.7633	0.919153	75.3555	0.21892	29.8545	0.0292809	0.01	10.4697	4.16605	20.9393	5.78425
1394	543.14	1	0	1218.61	36.5513	0.572029	108.15	0.438489	22.9868	0.290338	0.12	8.24781	5.59937	16.4956	8.28129
1395	310.443	1	0	467.348	37.5316	0.696114	18.2276	0.641658	39.6106	0.022012	0.01	10.5325	4.09417	21.065	5.71155
1396	96.6494	1	0.019328	1014.63	19.4874	0.0892696	92.2486	0.0937184	44.6024	0.891559	0.81	1.41943	3.86851	2.83887	6.30031
1397	372.442	1	0	2064.08	37.9777	0.504288	108.851	0.178811	26.8438	0.148094	0.04	9.58718	5.0324	19.1744	7.07397
1398	461.245	1	0	760.628	39.35	0.375871	53.0403	0.589556	41.3668	0.236509	0.09	8.80929	5.43052	17.6186	8.02108
1399	122.193	1	0	5027.11	38.4216	1.0173	77.551	0.0242259	40.8577	0.0874841	0	10.8145	3.85069	21.629	5.29286
1400	287.178	1	0	1365.92	36.8219	0.591258	82.772	0.206605	44.61	0.385304	0.22	6.3795	6.06372	12.759	8.65529
1401	323.048	1	0	592.114	32.6143	0.2491	46.256	0.526309	17.7844	0.430608	0.34	5.46463	6.03097	10.9293	9.13228
1402	59.2495	1	0.000359816	1251.16	21.2361	0.386427	50.888	0.0467099	34.8871	0.814997	0.69	1.96783	4.54348	3.93565	6.11466
1403	574.902	1	0	1412.96	33.2089	0.868018	102.917	0.403518	6.23802	0.0542389	0.02	10.7229	3.9182	21.4458	5.91422
1404	113.97	1	0	523.877	16.4736	0.201323	53.764	0.212083	43.9043	0.831766	0.75	1.48303	3.95578	2.96606	5.19723
1405	356.731	1	0	1458.93	31.6812	0.606799	132.112	0.241039	27.1812	0.487798	0.31	5.31977	6.11917	10.6395	8.50188
1406	152.103	1	7.78168	376.454	4.10559	0.0126832	29.3527	0.399973	48.4173	0.979795	0.97	0.191302	1.55626	0.382604	2.18961
1407	212.591	1	0.00239948	1064.05	24.0521	0.565706	92.1174	0.196574	19.2916	0.6948	0.51	3.30799	5.41303	6.61598	7.36804
1408	268.643	1	0	463.47	31.9696	0.357607	20.8874	0.560071	5.25838	0.198578	0.09	7.89004	5.8584	15.7801	7.64837
1409	337.216	1	0	483.339	34.0432	0.454291	32.8295	0.66862	18.9484	0.405775	0.21	6.51772	6.02233	13.0354	8.57924
1410	240.579	1	0	359.529	18.8736	0.223938	53.5376	0.643004	47.0254	0.823146	0.65	2.12667	4.65352	4.25333	5.8645
1411	303.573	1	0	2713.97	35.9956	1.00997	108.221	0.111231	16.1971	0.096112	0.02	10.3705	4.32275	20.741	5.91001
1412	288.307	1	0	708.041	25.2296	0.552635	69.148	0.397459	15.1827	0.642527	0.43	3.94735	5.602	7.89471	7.77256
1413	458.6	1	0	807.895	34.7288	0.719308	68.7987	0.55371	45.0882	0.388804	0.12	7.19597	5.88961	14.3919	7.61296
1414	372.338	1	0	571.681	33.5446	1.08166	26.4175	0.638001	8.52614	0.02867	0.01	10.8122	3.63754	21.6244	5.19189
1415	522.826	1	0	1023.82	36.0862	0.764777	69.7796	0.503102	47.6997	0.065909	0	10.3527	4.23164	20.7055	5.56532
1416	450.023	1	0	1497.54	35.0705	0.467219	125.357	0.296441	40.3323	0.372098	0.12	7.26482	5.94453	14.5296	7.78198
1417	116.114	1	0	2998	29.6804	0.520845	122.494	0.038449	25.8767	0.665201	0.46	3.86465	5.61754	7.7293	8.03801
1418	94.1948	1	1.09827	534.599	9.66591	0.151073	67.5177	0.173366	35.2876	0.955056	0.89	0.639486	2.67065	1.27897	3.67568
1419	432.208	1	0	788.708	26.7422	0.513121	110.639	0.535439	23.0007	0.626093	0.44	4.12392	5.79678	8.24785	8.21664
1420	181.692	1	0.00357768	654.923	18.3537	0.322968	90.8613	0.271273	47.1295	0.822259	0.72	1.75098	4.20628	3.50195	5.89784
1421	200.757	1	0	2467.49	37.0864	0.551003	91.3224	0.0806303	23.5999	0.362037	0.14	7.36394	5.94448	14.7279	8.18045
1422	316.033	1	0	924.393	34.7192	0.525386	51.9421	0.334772	13.3108	0.31612	0.14	7.54433	5.78725	15.0887	8.21639
1423	168.392	1	0	1473.06	33.1631	0.510765	72.4636	0.112487	46.9088	0.635842	0.38	4.61423	5.88512	9.22845	8.35959
1424	105.031	1	2.17748	259.239	9.09793	0.0299133	20.3799	0.392007	12.4767	0.950408	0.87	0.765593	2.92128	1.53119	3.99623
1425	289.809	1	0.0122023	479.351	22.5693	0.542231	58.4117	0.584714	18.9195	0.719277	0.53	3.13845	5.26136	6.27689	7.31179
1426	73.3023	1	0.181986	340.535	11.9132	0.141153	34.0468	0.208549	48.8236	0.931517	0.87	0.774324	2.95302	1.54865	4.03948
1427	574.895	1	0	848.744	28.9257	0.357082	134.041	0.662384	19.9618	0.550667	0.38	4.87643	6.01676	9.75286	8.92238
1428	220.197	1	0	543.792	37.6389	0.528047	21.6764	0.388414	20.4946	0.347342	0.17	7.25856	6.05389	14.5171	8.68758
1429	112.456	1	0	1669.32	28.0112	0.488281	73.1652	0.0665271	24.192	0.658481	0.51	3.47095	5.47089	6.9419	7.84623
1430	338.209	1	0	1112.36	29.1627	0.506692	109.267	0.298703	19.3382	0.570352	0.39	4.63361	5.84383	9.26721	8.57411
1431	362.134	1	0	1200.1	34.3827	0.648521	91.6599	0.296413	18.6406	0.400147	0.25	6.38013	6.02194	12.7603	9.00887
1432	390.468	1	0	1663.89	36.7649	0.653766	92.6542	0.232194	20.9187	0.16689	0.04	9.50414	5.00577	19.0083	6.95236
1433	287.768	1	0.0243272	822.879	21.1553	0.467054	104.099	0.343426	12.3926	0.730306	0.55	3.05126	5.24942	6.10252	7.36427
1434	217.654	1	0	655.732	30.0334	0.677969	37.7368	0.322111	22.1312	0.478651	0.3	5.02771	6.02634	10.0554	7.79723
1435	99.6174	1	0.012078	245.933	14.9268	0.219398	29.6779	0.384997	45.4454	0.877032	0.84	1.0553	3.49493	2.11059	5.02885
1436	427.124	1	0	671.505	29.3803	0.605042	74.7292	0.618428	26.6553	0.520703	0.3	5.11181	5.93365	10.2236	8.00447
1437	481.017	1	0	788.222	35.7606	0.525371	69.6509	0.594245	35.4987	0.349009	0.15	7.26127	6.00503	14.5225	8.24036
1438	362.634	1	0	1478.96	37.5087	0.724695	71.2434	0.24239	24.4666	0.0937911	0.03	10.1943	4.465	20.3886	6.44249
1439	311.976	1	0	1789.05	36.4937	0.404381	120.366	0.172077	49.2642	0.468415	0.23	6.26819	6.07959	12.5364	8.62271
1440	478.722	1	0	1314.67	37.4774	0.575388	94.4332	0.358821	36.9624	0.207543	0.05	8.99625	5.41998	17.9925	7.32031
1441	54.2031	1	0.000278855	1146.72	17.0637	0.371485	66.0664	0.0466768	38.4476	0.909357	0.8	1.27246	3.74	2.54492	5.28328
1442	123.002	1	4.85684	404.89	4.80213	0.0456885	129.744	0.300745	12.4897	0.967973	0.94	0.354726	2.03949	0.709451	2.84726
1443	578.866	1	0	997.365	36.6758	0.852899	76.671	0.571018	47.4729	0.14625	0.01	10.1485	4.54535	20.2971	6.01586
1444	419.628	1	0.00222093	759.472	24.3489	0.637873	134.506	0.539725	49.9717	0.678876	0.53	3.16791	5.31244	6.33582	7.34487
1445	191.925	1	0	1199.97	37.9602	0.570465	37.3085	0.157147	11.439	0.262945	0.12	8.3083	5.66173	16.6166	8.38061
1446	241.845	1	0.0255023	452.994	20.3044	0.422956	62.3846	0.516007	20.352	0.830635	0.67	2.3059	4.79711	4.61181	7.10936
1447	511.29	1	0	804.911	27.5295	0.639132	138.377	0.620131	49.2833	0.614565	0.44	3.97734	5.6464	7.95467	7.96221
1448	402.292	1	0.0232887	717.587	21.8373	0.380855	131.232	0.548416	23.5031	0.765311	0.57	2.93554	5.19393	5.87108	7.41297
1449	191.255	1	0.0047283	1310.07	17.4419	0.454328	134.349	0.144622	8.87878	0.823306	0.59	2.53006	4.9369	5.06012	6.21131
1450	204.035	1	0	1011.06	32.0002	0.523962	64.2748	0.197237	41.0945	0.636769	0.43	4.29714	5.90925	8.59427	8.54964
1451	199.007	1	0	650.626	26.1562	0.485101	47.9715	0.297204	12.6883	0.694439	0.52	3.59261	5.51949	7.18523	8.35948
1452	254.593	1	0	2663.51	37.7283	0.576531	101.397	0.0948894	21.9392	0.170778	0.05	9.09454	5.20257	18.1891	7.23764
1453	500.584	1	0	1266.23	34.6601	0.442449	137.368	0.388511	44.3778	0.511155	0.23	6.21185	6.09163	12.4237	8.60684
1454	57.1371	1	0	3292.13	40.2942	0.513098	36.245	0.0172187	19.1218	0.383688	0.18	7.05315	6.06987	14.1063	8.59157
1455	127.767	1	1.82765	634.205	9.02973	0.0700874	111.094	0.198837	40.5414	0.89414	0.9	0.592555	2.59909	1.18511	3.58739
1456	363.894	1	0	1517.02	36.4518	0.334535	85.3525	0.236915	24.9255	0.211481	0.06	8.75052	5.47296	17.501	7.25816
1457	223.865	1	0.00362091	1049.63	25.0211	0.58325	95.0777	0.209612	18.8685	0.725891	0.53	3.32485	5.44115	6.6497	7.84668
1458	472.703	1	0.00156598	826.676	26.331	0.637694	123.832	0.559711	25.9573	0.638855	0.4	4.22996	5.81801	8.45992	7.86605
1459	24.1128	1	0	12319.3	45.8891	0.361723	58.3641	0.00195225	46.1907	0.400238	0.21	6.95407	6.04284	13.9081	9.05107
1460	422.773	1	0	736.611	37.7842	0.601912	43.1479	0.559885	31.6887	0.117846	0.04	9.64479	4.77346	19.2896	6.90471
1461	427.11	1	0	619.868	34.5572	0.375753	65.8542	0.663399	45.7338	0.566146	0.35	5.30233	6.10656	10.6047	9.20855
1462	210.519	1	4.40005	312.869	6.58924	0.0483821	82.529	0.661241	16.0287	0.94112	0.9	0.579571	2.54408	1.15914	3.51162
1463	342.896	1	0	501.89	38.5119	0.537377	23.7334	0.657803	29.3492	0.13458	0.05	9.5638	4.81545	19.1276	7.11549
1464	72.0845	1	0	1397.15	29.6817	0.764365	37.0804	0.0507814	22.6206	0.650757	0.48	3.66204	5.50451	7.32407	7.90756
1465	204.461	1	0	2540.14	39.6116	0.406591	93.1348	0.0797236	24.055	0.338808	0.17	7.566	5.86542	15.132	8.92594
1466	248.142	1	0	512.129	39.4622	0.643514	19.4647	0.464294	41.8197	0.260677	0.07	8.57001	5.62758	17.14	7.67565
1467	225.548	1	0	470.922	40.3487	0.365621	18.5382	0.454387	49.5969	0.291751	0.16	7.44616	5.91114	14.8923	8.62846
1468	198.878	1	0	1395.82	32.184	0.467832	82.7554	0.140158	30.7304	0.653629	0.41	4.52018	5.88433	9.04036	8.68689
1469	211.1	1	0.000887979	625.036	24.6962	0.45264	58.3094	0.327939	41.5697	0.697032	0.55	3.00793	5.2508	6.01586	7.14976
1470	100.82	1	3.93675	397.339	5.26473	0.115679	36.2724	0.250448	48.201	0.97916	0.96	0.240163	1.71669	0.480325	2.40983
1471	36.8421	1	0	13809.4	42.2677	0.462182	87.6788	0.00266282	27.3886	0.281159	0.11	7.93361	5.64798	15.8672	7.97186
1472	529.454	1	0	1041.35	32.373	0.382774	136.57	0.49813	49.6398	0.440839	0.3	5.41819	5.98522	10.8364	8.42369
1473	512.886	1	0	1167.65	35.943	0.535843	99.9668	0.431921	23.1953	0.31016	0.11	8.06957	5.73375	16.1391	8.1226
1474	108.71	1	0.00270686	1051.59	22.2646	0.51657	68.5502	0.101658	38.6415	0.832854	0.66	2.24305	4.7315	4.48609	6.5639
1475	544.529	1	0	831.823	37.1446	0.898325	58.7735	0.641935	24.816	0.0807588	0.04	10.3526	4.29629	20.7052	6.49644
1476	306.419	1	0	1135.82	30.5344	0.805687	74.6668	0.265578	10.21	0.360733	0.19	6.28577	6.04368	12.5715	8.05549
1477	151.632	1	0.00210835	618.904	14.3625	0.13411	122.636	0.240224	48.3211	0.914825	0.85	1.02698	3.38856	2.05395	5.1296
1478	63.7058	1	0.00104563	1780.89	18.7795	0.276169	106.684	0.0354555	37.9888	0.894614	0.78	1.44335	3.94535	2.88671	5.81894
1479	518.418	1	0	892.97	38.4749	0.685156	72.4879	0.566975	48.5058	0.225153	0.08	8.54378	5.55913	17.0876	7.88709
1480	112.626	1	0	1415.36	16.9368	0.182366	136.39	0.078808	41.9236	0.83685	0.73	1.5856	4.0523	3.17121	5.2848
1481	613.124	1	0	984.224	34.3513	0.42292	87.4803	0.61314	11.474	0.16396	0.06	9.30068	5.11345	18.6014	7.30092
1482	160.601	1	0.00356649	695.265	24.6294	0.615899	41.724	0.225327	12.7865	0.706372	0.47	3.57215	5.50093	7.1443	7.44176
1483	68.161	1	0.00750584	544.745	18.6325	0.3195	35.5061	0.121582	42.1352	0.858933	0.8	1.37968	3.85123	2.75937	5.80423
1484	389.773	1	0	1941.2	38.4574	0.378735	134.8	0.198412	44.2021	0.309074	0.14	7.59795	5.83081	15.1959	8.51263
1485	315.894	1	0	1927.43	37.4561	0.618916	86.965	0.162339	26.3117	0.126431	0.03	9.49979	4.91213	18.9996	6.82664
1486	128.736	1	0	2269.1	33.3169	0.477947	58.3379	0.0562459	5.25232	0.449331	0.18	6.80023	6.03369	13.6005	8.44636
1487	861.947	1	0	1319.65	33.3795	0.978227	138.464	0.647736	15.0206	0.0237694	0.01	11.1597	3.44786	22.3195	5.03163
1488	634.946	1	0	1100.01	29.063	0.598037	129.006	0.569747	7.16028	0.36786	0.12	7.32057	5.91546	14.6411	7.83064
1489	570.612	1	0	1324.01	33.7745	1.06189	91.9309	0.427275	22.0209	0.0143926	0	11.1611	3.31207	22.3223	4.59094
1490	103.568	1	7.96115	237.358	3.12577	0.0367186	30.3667	0.431222	20.4146	0.976478	0.97	0.172585	1.4038	0.34517	1.97511
1491	310.383	1	0	862.028	29.1731	0.555732	82.8777	0.351684	40.3613	0.580311	0.4	4.31951	5.80525	8.63901	7.9206
1492	258.831	1	0	1813.96	33.2235	0.342254	124.459	0.140901	26.8116	0.523627	0.36	5.1029	5.92991	10.2058	8.96416
1493	470.744	1	0	1801.22	34.5912	0.761704	106.773	0.259477	28.0533	0.0292982	0	10.8005	3.74797	21.6011	4.93275
1494	201.13	1	0.00148949	505.516	13.7776	0.304328	94.7726	0.389472	18.9006	0.901026	0.76	1.43817	3.83435	2.87635	5.29963
1495	84.895	1	0	5812.27	37.0151	0.455871	89.8803	0.014551	13.7802	0.285141	0.11	7.49199	5.87545	14.984	7.75306
1496	230.637	1	1.77345	398.651	9.228	0.154958	118.498	0.567205	28.0825	0.905922	0.88	0.734472	2.80149	1.46894	4.12655
1497	63.8811	1	0	4550.56	30.3156	0.798204	93.4725	0.013971	14.5788	0.630852	0.4	4.23986	5.76583	8.47971	7.88796
1498	189.767	1	0.0249453	343.382	13.7325	0.33149	56.3035	0.535985	9.42192	0.855925	0.77	1.53123	4.07703	3.06246	5.88677
1499	370.876	1	0	611.311	31.9147	0.830497	55.5209	0.586448	38.7163	0.460928	0.28	5.40722	6.08518	10.8144	8.12248
1500	88.0824	1	0.00132494	1839.89	24.7435	0.453834	74.2413	0.0473888	14.7968	0.681533	0.57	2.95922	5.16354	5.91844	7.3953
1501	151.932	1	0	597.807	30.3847	0.450971	32.8239	0.244699	46.9189	0.695486	0.5	3.64957	5.62417	7.29914	8.16262
1502	400.044	1	0	848.687	31.7427	0.484342	78.3297	0.46044	21.2209	0.464724	0.26	5.79988	6.08569	11.5998	8.4698
1503	342.921	1	0	1528.7	37.2436	0.612711	79.8786	0.221497	21.919	0.232721	0.06	8.87692	5.41004	17.7538	7.51852
1504	236.66	1	0	887.252	40.3416	0.547489	33.4394	0.259827	33.2107	0.222398	0.11	8.37911	5.5636	16.7582	8.30979
1505	296.457	1	0	677.181	29.0896	0.41565	45.056	0.426946	5.96479	0.529257	0.26	5.95261	6.0078	11.9052	8.55694
1506	269.44	1	0	1109.74	37.7341	0.731434	37.6766	0.239279	36.7195	0.0142591	0.01	10.7141	3.99901	21.4282	5.61727
1507	164.088	1	0.00568445	247.154	14.1679	0.32882	33.157	0.63571	9.0323	0.869716	0.75	1.60186	4.07919	3.20372	5.81823
1508	370.442	1	0.0377924	866.294	22.3552	0.538875	121.17	0.420221	10.3486	0.649852	0.5	3.55379	5.54756	7.10757	7.92114
1509	198.268	1	0	732.655	36.1306	0.643158	26.6588	0.262856	8.87001	0.404463	0.19	7.25024	5.93553	14.5005	9.0137
1510	261.6	1	0	549.329	40.1366	0.436042	20.871	0.457881	46.6808	0.173253	0.07	9.06882	5.10225	18.1376	7.47625
1511	584.89	1	0	1352.47	38.2137	0.569898	115.748	0.426234	47.2914	0.172022	0.05	9.22716	5.20967	18.4543	7.35736
1512	296.076	1	0.0142636	548.991	20.7912	0.377342	90.4618	0.524007	31.2328	0.695456	0.65	2.37983	4.87427	4.75966	6.95729
1513	209.004	1	0	1526.07	33.7283	0.364648	67.7301	0.135096	17.7711	0.490417	0.2	6.36339	6.06195	12.7268	8.15216
1514	246.599	1	0	1521.81	27.9292	0.712186	112.393	0.160057	16.1893	0.548398	0.37	4.51782	5.81787	9.03564	8.00388
1515	355.239	1	0	737.998	33.1629	0.539199	56.2123	0.468201	19.2718	0.472652	0.24	6.21424	6.03567	12.4285	8.59177
1516	199.847	1	0	2485.82	37.8794	0.627141	94.3804	0.0796389	34.0767	0.371395	0.16	7.14267	5.96143	14.2853	8.29643
1517	350.903	1	0	1150.08	36.8136	0.637256	52.8323	0.300879	34.272	0.03603	0.01	10.3187	4.28214	20.6375	5.80942
1518	351.775	1	0	972.875	37.9931	0.744277	45.2005	0.355152	21.6852	0.101903	0.04	10.1873	4.47709	20.3747	6.70221
1519	295.052	1	0	743.02	36.2773	0.594044	43.7092	0.385202	44.8736	0.435596	0.18	6.66491	6.14878	13.3298	8.22
1520	210.592	1	0.00164488	1138.46	26.3191	0.59369	81.6941	0.182036	12.6436	0.626114	0.45	3.95522	5.62242	7.91043	8.07996
1521	324.567	1	0	523.568	37.9472	0.535281	32.942	0.592261	36.2474	0.370659	0.22	6.75131	5.98806	13.5026	9.05503
1522	385.967	1	0	1089.55	33.9061	0.455694	92.2998	0.347338	15.8928	0.514566	0.29	6.11957	6.12938	12.2391	9.41121
1523	122.616	1	1.36262	479.979	9.195	0.0794806	96.9909	0.250847	39.5384	0.968328	0.92	0.526236	2.44276	1.05247	3.79062
1524	106.04	1	6.49609	504.351	3.96019	0.0199414	125.579	0.208744	44.2543	0.962219	0.97	0.176117	1.43534	0.352235	2.01955
1525	433.379	1	0	886.034	36.7941	0.391432	59.7552	0.478553	17.3186	0.215417	0.09	8.61256	5.58171	17.2251	8.09076
1526	612.045	1	0	1177.53	36.0637	0.554196	107.442	0.511961	18.1663	0.136146	0.07	9.05069	5.38982	18.1014	7.72692
1527	194.657	1	0.0025529	395.017	17.8725	0.356442	62.685	0.475174	47.8504	0.856942	0.75	1.61716	4.1202	3.23431	5.91234
1528	333.235	1	0	1089.86	36.3858	0.669925	69.8965	0.299593	26.4037	0.416478	0.19	6.97416	5.99903	13.9483	8.67724
1529	593.626	1	0	945.643	35.6889	0.459592	110.55	0.613417	34.9074	0.453315	0.22	6.79714	5.9737	13.5943	8.93412
1530	489.169	1	0	1052	38.4479	0.780021	73.5164	0.456477	34.3092	0.161661	0.06	9.41326	5.01494	18.8265	7.41577
1531	450.36	1	0	1243.28	36.604	0.484451	97.5664	0.356177	29.4642	0.348894	0.13	7.73008	5.91609	15.4602	8.27917
1532	324.123	1	0.00689557	464.121	22.5055	0.523639	67.7896	0.674165	32.2907	0.717224	0.56	2.92496	5.24217	5.84992	7.05
1533	472.347	1	0	958.852	35.4412	0.703315	62.4483	0.484585	10.2094	0.13443	0.05	9.77303	4.75743	19.5461	7.11674
1534	193.956	1	0	1243.7	36.3307	0.508144	53.5253	0.152971	38.3633	0.470663	0.24	6.05566	6.05413	12.1113	8.52283
1535	101.507	1	0.559674	344.024	11.2681	0.106448	40.4499	0.286654	25.436	0.921121	0.86	0.852423	3.1268	1.70485	4.26434
1536	559.622	1	0	901.538	34.1247	0.893564	65.288	0.611744	8.87644	0.0246611	0.03	10.4323	4.15576	20.8647	6.20627
1537	86.3237	1	0	4222.2	32.0599	0.786156	107.49	0.0203353	14.321	0.569541	0.38	4.61992	5.95154	9.23984	8.47821
1538	363.189	1	0	784.335	30.0176	0.591018	90.075	0.450652	38.5761	0.580144	0.44	4.21616	5.8505	8.43232	8.58311
1539	414.578	1	0	846.481	37.7977	0.732997	47.4406	0.479595	49.0184	0.110342	0.02	9.92285	4.62135	19.8457	6.33084
1540	199.797	1	0	4240.91	37.129	0.588504	122.924	0.046909	17.259	0.123094	0.03	9.40192	5.0919	18.8038	6.76073
1541	78.7503	1	0.573445	450.372	10.6556	0.110729	56.6443	0.170882	42.8902	0.912947	0.91	0.587028	2.57236	1.17406	3.96358
1542	459.243	1	0	1587.11	31.765	0.305842	130.76	0.286354	6.23809	0.272267	0.15	7.55645	6.04589	15.1129	8.59992
1543	170.698	1	7.40662	274.81	3.44098	0.0363311	27.5696	0.614064	46.1272	0.977621	0.97	0.172152	1.40196	0.344303	1.97256
1544	312.294	1	0	1971.93	33.6225	0.528947	134.236	0.156686	23.9471	0.378893	0.22	6.21759	5.991	12.4352	8.37082
1545	418.014	1	0	766.251	25.5878	0.541977	106.755	0.533316	30.6998	0.6297	0.41	4.01805	5.70458	8.03611	7.42934
1546	112.34	1	1.05013	312.579	10.5143	0.0101639	19.9442	0.339655	49.0354	0.933816	0.89	0.673017	2.80698	1.34603	3.863
1547	341.24	1	0.0068254	632.411	21.7321	0.41965	111.835	0.525788	47.0491	0.77987	0.61	2.56839	4.94215	5.13679	6.82792
1548	16.4032	1	0.000674268	2441.21	19.5935	0.344309	33.7193	0.00667455	14.6827	0.834489	0.74	1.61549	4.12993	3.23098	5.64752
1549	463.044	1	0	2004.14	33.1386	0.607528	138.961	0.22933	10.0498	0.212323	0.04	9.0803	5.19923	18.1606	6.79901
1550	618.955	1	0	1246.87	34.5376	1.21425	99.3037	0.491101	6.22076	0.0646025	0.06	10.5323	4.11563	21.0646	6.91025
1551	70.3183	1	0.00390958	1159.8	25.0565	0.283618	41.3717	0.0596143	12.595	0.766019	0.64	2.65201	5.03039	5.30402	7.80123
1552	113.358	1	0	1192.42	32.0437	0.600026	42.2694	0.0932321	26.9448	0.652671	0.42	4.29608	5.77181	8.59216	8.40399
1553	66.6312	1	0.00732968	1962.14	23.2208	0.485975	67.9493	0.0336498	10.9824	0.782391	0.62	2.60866	5.01529	5.21733	7.21844
1554	424.893	1	0	1080.74	34.2665	0.443394	96.6483	0.38548	23.9595	0.475427	0.24	6.38157	6.03294	12.7631	8.8343
1555	219.476	1	0.00425239	411.888	20.8725	0.52167	44.1607	0.513552	25.3874	0.771175	0.57	2.69601	5.04265	5.39203	6.48222
1556	495.242	1	0	847.698	30.6261	0.419527	110.395	0.570457	25.6049	0.548371	0.35	5.08667	5.96818	10.1733	8.8161
1557	270.861	1	1.5613	427.393	10.2122	0.116558	124.858	0.62081	36.7086	0.921474	0.86	0.854352	3.1302	1.7087	4.26856
1558	175.334	1	0	1707.2	39.9697	0.58252	43.922	0.101424	40.2436	0.0957612	0.04	9.21939	5.1182	18.4388	7.13775
1559	141.797	1	0	526.042	30.4446	0.322008	17.9935	0.259923	5.46914	0.500047	0.3	5.47579	6.06301	10.9516	8.69783
1560	608.523	1	0	1259.13	37.2097	0.593707	113.356	0.476118	31.5681	0.211917	0.05	9.12188	5.34986	18.2438	7.49653
1561	365.844	1	0	565.962	35.5719	0.569263	42.6777	0.621383	47.0143	0.454879	0.21	6.38867	6.08395	12.7773	8.36271
1562	535.731	1	0	1131.77	34.7463	0.48693	105.949	0.465407	19.3625	0.301689	0.13	7.70777	5.79172	15.4155	8.2648
1563	632.429	1	0	1006.25	37.9785	0.761775	86.9695	0.617279	44.1085	0.105748	0.04	9.8448	4.71085	19.6896	6.87819
1564	261.979	1	0	1076.9	34.287	0.525069	50.9248	0.238973	13.8311	0.314177	0.12	7.45493	5.84639	14.9099	7.8588
1565	293.587	1	0.0241702	827.153	23.5007	0.539794	82.6709	0.348358	7.99607	0.616726	0.44	3.94011	5.66049	7.88023	7.97374
1566	323.441	1	0.0102553	477.262	18.0415	0.430965	102.891	0.658308	27.6147	0.818871	0.7	1.99089	4.51295	3.98179	6.5301
1567	258.067	1	0	641.128	15.5982	0.16287	134.162	0.394953	33.1238	0.877711	0.73	1.65761	4.21391	3.31522	5.49022
1568	525.986	1	0	838.933	39.7774	0.532235	70.78	0.61013	39.9263	0.209906	0.14	8.31081	5.71914	16.6216	8.79299
1569	591.422	1	0	1416	37.0652	0.478162	121.443	0.412308	29.3792	0.165468	0.05	9.32511	5.18342	18.6502	7.30244
1570	126.81	1	0.00346083	895.031	22.6261	0.619625	54.8154	0.139031	23.6268	0.722613	0.56	2.77917	5.04632	5.55833	6.65987
1571	129.682	1	8.04982	247.029	2.32889	0.0146938	107.264	0.520511	35.2468	0.976732	0.98	0.111292	1.11268	0.222583	1.56958
1572	135.195	1	0	440.697	26.831	0.468388	23.9068	0.293264	32.8213	0.691923	0.52	3.26359	5.34392	6.52719	7.47612
1573	434.274	1	0	734.235	36.1555	0.889487	40.3602	0.579667	23.2464	0.102968	0.02	10.6065	4.0364	21.213	5.75813
1574	291.226	1	0	632.037	31.0693	0.923241	51.4937	0.445547	39.8313	0.606219	0.35	4.73481	5.97437	9.46963	8.16785
1575	195.236	1	0	629.339	29.5222	0.242851	43.5616	0.299719	29.1225	0.647132	0.51	3.73299	5.60521	7.46598	8.50521
1576	299.146	1	0.000871574	429.776	27.0887	0.588696	46.5431	0.665305	36.8067	0.706049	0.49	3.61434	5.63139	7.22868	7.88488
1577	107.25	1	0	581.544	33.997	0.477112	17.422	0.176942	35.608	0.625231	0.37	4.70519	5.87502	9.41038	8.38495
1578	83.9745	1	0.00245853	538.323	16.8158	0.270098	44.0329	0.152016	43.82	0.859179	0.78	1.36714	3.81975	2.73429	5.26518
1579	191.062	1	0	1814.29	38.4698	0.570983	50.2227	0.104175	36.0658	0.195316	0.03	9.35301	4.99817	18.706	6.67555
1580	121.441	1	7.06664	342.857	5.28411	0.000162859	17.045	0.34924	22.9474	0.975037	0.95	0.314213	1.96824	0.628426	2.75456
1581	273.155	1	0	1088.83	36.6228	0.435728	63.1724	0.24546	43.8446	0.400648	0.22	6.31029	6.17944	12.6206	8.60715
1582	77.7218	1	0.00461399	1086.35	23.0513	0.339628	43.0105	0.0703926	13.2145	0.7534	0.61	2.64214	5.01402	5.28428	7.07256
1583	108.781	1	7.6475	214.893	3.33597	0.0214949	47.5044	0.499511	11.2648	0.970787	0.96	0.236466	1.66625	0.472932	2.33835
1584	225.157	1	0.0104461	706.335	20.2527	0.719165	65.3526	0.312693	8.47392	0.669173	0.49	3.26562	5.40758	6.53124	6.80412
1585	535.153	1	0	1079.92	37.1644	1.14845	70.8031	0.488713	44.6055	0.0247777	0.02	11.027	3.60272	22.0541	5.48583
1586	312.524	1	0	772.297	34.1141	0.41878	36.2735	0.396324	7.60615	0.206288	0.05	8.92703	5.32095	17.8541	7.23936
1587	431.885	1	0	871.936	29.8218	0.517243	92.6283	0.484798	20.3493	0.513084	0.28	5.45083	6.0449	10.9017	8.19013
1588	267.073	1	0.0637131	397.276	13.0439	0.202037	67.5934	0.657599	5.16296	0.848916	0.66	2.0932	4.65266	4.18639	5.88742
1589	24.7928	1	1.76506	995.524	7.92945	0.0144974	51.1974	0.0247111	21.9996	0.958655	0.94	0.373093	2.14448	0.746186	2.9938
1590	733.984	1	0	1324.99	37.4511	0.785064	139.217	0.546296	43.3566	0.208349	0.04	9.43703	5.17394	18.8741	7.18211
1591	271.892	1	0	1842.75	35.1455	0.388188	121.576	0.14565	36.5905	0.510109	0.3	5.57279	6.02811	11.1456	8.93225
1592	374.118	1	0.00320876	623.481	23.8658	0.606523	95.3804	0.583795	42.4819	0.718375	0.5	3.25465	5.31857	6.5093	7.09442
1593	680.284	1	0	1574.78	35.908	0.847872	137.693	0.427968	44.344	0.0322951	0.01	10.5588	3.9515	21.1177	5.56683
1594	541.996	1	0	1166.03	36.1497	0.565875	104.21	0.457054	23.8665	0.243988	0.11	8.16884	5.56372	16.3377	8.14339
1595	476.806	1	0	1008.4	33.9919	0.25624	123.459	0.462038	38.2273	0.55109	0.38	5.21308	5.99757	10.4262	9.46803
1596	274.258	1	0	3360.69	37.9318	0.732811	126.771	0.0811701	29.5401	0.0509001	0.03	9.90628	4.58923	19.8126	6.47081
1597	382.558	1	0	572.751	26.7271	0.660685	69.3565	0.647206	22.859	0.570875	0.41	4.19338	5.69589	8.38676	7.95818
1598	253.929	1	0.0300629	363.36	19.6037	0.426848	42.0001	0.67319	8.86801	0.757508	0.57	2.88066	5.16329	5.76131	7.13791
1599	127.23	1	0	2428.8	42.8637	0.436595	49.7745	0.0518281	48.2584	0.195202	0.11	8.41434	5.59119	16.8287	8.29559
1600	94.5717	1	0	5281.62	32.9157	0.544951	129.65	0.0178302	13.3094	0.478616	0.31	5.25525	6.03213	10.5105	8.36231
1601	259.519	1	0	386.158	36.68	0.423263	20.4403	0.632676	33.0386	0.444801	0.23	6.32268	6.00492	12.6454	8.81644
1602	268.076	1	0	584.298	41.1663	0.647665	21.1991	0.442411	47.2114	0.138432	0.06	9.7601	4.7588	19.5202	7.31228
1603	713.684	1	0	1215.42	37.9743	0.597856	122.058	0.578247	49.7731	0.167828	0.04	9.58689	4.97138	19.1738	7.09695
1604	734.607	1	0	1241.43	34.8997	0.508074	133.663	0.584004	20.9192	0.129339	0.04	9.22413	5.20792	18.4483	7.10502
1606	74.2926	1	0.0144357	1184.92	20.1187	0.356701	57.7457	0.0618623	11.6735	0.80912	0.7	2.05447	4.56631	4.10893	6.69247
1607	304.445	1	0	687.187	35.5165	0.556896	36.5419	0.43033	10.9411	0.294246	0.15	7.61795	5.89988	15.2359	8.67818
1608	153.659	1	0.00848336	1029.86	23.1882	0.782504	63.9974	0.146847	9.31776	0.690046	0.51	3.32968	5.37133	6.65936	7.45977
1609	136.372	1	1.12683	215.313	10.1739	0.152764	26.7341	0.608428	12.5653	0.929573	0.84	0.949707	3.24759	1.89941	4.40206
1610	144.626	1	0	3502.53	34.4419	0.435633	108.004	0.0410379	14.0125	0.407431	0.2	6.38537	6.06463	12.7707	8.27258
1611	232.46	1	0	1767.51	35.1002	0.468529	65.5423	0.130185	5.54617	0.219473	0.1	8.50046	5.50119	17.0009	8.17038
1612	431.34	1	0	1127.95	37.3925	0.430069	77.3915	0.375591	18.956	0.174062	0.12	8.45827	5.53517	16.9165	8.37401
1613	437.544	1	0	647.988	26.0051	0.696206	84.2432	0.657953	19.1771	0.588864	0.36	4.49232	5.84739	8.98464	7.70219
1614	212.465	1	0	984.734	28.8575	0.261706	54.6794	0.211766	5.06938	0.525097	0.37	5.14454	6.03455	10.2891	9.21114
1615	469.4	1	0	791.695	26.6326	0.510464	136.569	0.578756	39.6089	0.631144	0.5	3.63863	5.5859	7.27725	8.14033
1616	387.402	1	0	559.548	25.8935	0.770741	69.715	0.671194	15.1205	0.626456	0.44	4.12928	5.72674	8.25856	8.26931
1617	280.495	1	0.000128698	820.707	26.3658	1.02426	62.7821	0.335029	10.0503	0.59112	0.3	4.92369	5.96037	9.84738	7.63248
1618	147.068	1	4.19377	400.736	7.35302	0.0939227	54.6208	0.360977	24.8629	0.94615	0.92	0.500596	2.46754	1.00119	3.42531
1619	208.031	1	0	2356.01	38.5383	0.483324	89.4503	0.0874194	12.589	0.284906	0.21	7.43119	5.87722	14.8624	9.43156
1620	188.248	1	0.010615	685.657	16.758	0.372817	105.216	0.269261	23.6006	0.814999	0.75	1.64418	4.09684	3.28836	6.05333
1621	301.062	1	0	1560.28	40.575	0.435991	87.651	0.189775	46.9956	0.389215	0.21	7.22048	5.96785	14.441	9.26278
1622	516.687	1	0	752.968	29.2982	0.787277	96.9313	0.669687	25.9811	0.452305	0.28	5.36585	6.1089	10.7317	7.96933
1623	203.369	1	0	848.356	36.9252	0.888271	21.6769	0.235417	24.6774	0.0193699	0.01	10.7071	3.78854	21.4142	5.40986
1625	235.741	1	0.00290398	456.684	15.0125	0.537965	68.5741	0.504261	8.28162	0.812844	0.66	2.10016	4.5867	4.20033	6.02131
1626	462.198	1	0	744.211	38.0977	0.396516	58.6168	0.602838	36.1599	0.236195	0.14	7.80276	5.79717	15.6055	8.5746
1627	204.247	1	1.31869e-06	656.106	26.0126	0.388781	62.0196	0.301973	45.3079	0.659301	0.6	2.8712	5.1474	5.7424	7.68459
1628	100.058	1	3.51427	490.891	7.50844	0.0371039	23.1934	0.200467	37.9767	0.943208	0.93	0.425135	2.24838	0.85027	3.12992
1629	44.9647	1	0.0042274	3143.61	21.4135	0.545589	104.941	0.0142232	22.4131	0.773448	0.73	1.83314	4.39865	3.66627	6.45398
1630	273.214	1	0	1523.92	30.6227	0.607092	130.346	0.176732	45.7487	0.640716	0.41	4.31341	5.79615	8.62682	8.22354
1632	343.695	1	0	1845.75	35.3013	0.487484	109.755	0.184249	9.50803	0.273085	0.15	7.83437	5.76918	15.6687	8.76005
1633	262.427	1	0.00190049	472.829	23.995	0.759048	45.3191	0.536018	20.103	0.617135	0.45	3.61925	5.50369	7.2385	7.14924
1634	205.661	1	0.607081	517.477	10.2703	0.0773511	136.25	0.391086	24.0016	0.933831	0.83	0.951297	3.14061	1.90259	4.24244
1635	81.2938	1	0	3211.22	27.3463	0.48399	118.882	0.0251482	31.1577	0.668868	0.57	2.98818	5.20659	5.97637	7.56905
1636	362.88	1	0	534.894	31.822	0.362182	49.6678	0.652165	35.3507	0.540165	0.32	5.1463	5.91456	10.2926	8.41424
1637	238.496	1	0.00237565	576.15	24.9543	0.520261	54.8902	0.401197	16.6447	0.695754	0.55	3.32122	5.42983	6.64243	8.04952
1638	34.2128	1	0.0272368	1528.68	12.6407	0.172087	105.714	0.0222163	33.6144	0.901089	0.9	0.666965	2.78134	1.33393	4.2835
1639	189.08	1	0.0164048	327.291	23.1066	0.395748	29.3731	0.548088	19.7453	0.719182	0.61	2.70821	5.06065	5.41642	7.50269
1640	42.0975	1	0	2615.26	16.8834	0.0371597	111.701	0.0160099	32.0277	0.920459	0.78	1.34289	3.83809	2.68578	5.09583
1641	352.296	1	0	1786.21	35.4918	0.360383	109.57	0.195054	7.22438	0.26499	0.2	7.78054	5.65962	15.5611	9.39908
1642	201.973	1	0	543.444	25.7993	0.404474	45.924	0.358794	30.5258	0.679208	0.55	3.16077	5.29912	6.32154	7.66727
1643	116.133	1	7.67575	469.905	3.8639	0.0509357	116.523	0.245299	38.2148	0.935982	0.97	0.181058	1.47386	0.362115	2.0737
1644	169.024	1	0	1495.54	41.2082	0.572953	38.4296	0.111273	32.0997	0.196613	0.09	8.87146	5.41238	17.7429	7.96068
1645	143.473	1	0	1203.48	34.7549	0.507673	31.1516	0.117284	5.47593	0.330119	0.15	7.46988	5.85355	14.9398	8.44153
1646	631.51	1	0	944.063	35.1025	0.398017	105.95	0.655046	19.3158	0.429475	0.17	7.5483	5.90899	15.0966	8.81528
1647	180.18	1	0.0071184	468.815	19.9799	0.365989	56.0456	0.371643	36.5904	0.806385	0.7	1.98725	4.49651	3.9745	6.45317
1648	152.195	1	0	1792.42	29.2337	0.67116	80.5908	0.0839707	12.0397	0.534323	0.37	4.58563	5.79419	9.17125	8.24299
1649	94.5791	1	0.00102317	423.466	15.8426	0.192231	47.5415	0.216391	48.008	0.881959	0.83	1.11694	3.46917	2.23389	5.23716
1650	120.961	1	0.00438057	175.501	13.3611	0.318478	21.7842	0.649097	10.668	0.892351	0.81	1.25451	3.68073	2.50903	5.45455
1651	115.559	1	0	4625.5	32.3327	0.784991	137.572	0.0248662	49.2848	0.558562	0.24	5.29754	5.96124	10.5951	7.16485
1652	182.897	1	0	422.206	31.0044	0.276698	21.1476	0.412218	14.499	0.580639	0.38	4.75983	5.88386	9.51966	8.72672
1653	54.1515	1	0	3853.91	27.7133	0.250264	93.8713	0.0139725	11.5394	0.729766	0.6	3.02847	5.22319	6.05694	8.22243
1654	279.876	1	0	1800.45	35.2121	0.592855	72.908	0.15404	18.5273	0.197956	0.01	9.38207	4.93423	18.7641	6.27314
1655	411.157	1	0	674.678	35.5111	0.420788	54.4739	0.590168	43.9129	0.440543	0.17	6.7555	5.94014	13.511	8.20793
1656	288.597	1	0	479.948	37.335	0.433441	24.2814	0.574492	22.5721	0.296777	0.16	7.4658	5.84964	14.9316	8.57262
1657	457.459	1	0	1956.71	36.4365	0.702648	122.07	0.231833	37.9856	0.0653224	0.01	9.96086	4.53712	19.9217	6.07624
1658	357.488	1	0	622.465	30.4151	0.536057	51.4693	0.55737	12.1737	0.431077	0.27	5.74781	6.04175	11.4956	8.56438
1659	399.453	1	0	669.994	38.2294	0.519905	44.2098	0.577102	39.7213	0.35297	0.11	8.02701	5.71038	16.054	8.1703
1660	184.087	1	0	1047.89	25.5319	0.634907	66.1356	0.17276	15.1212	0.663078	0.42	3.92934	5.64145	7.85868	7.38431
1661	306.88	1	0	1407.02	33.972	0.572856	60.9671	0.215841	7.16221	0.129355	0.02	9.60098	4.82205	19.202	6.55295
1662	181.104	1	0.000765942	346.865	24.113	0.668563	26.4674	0.496447	22.4754	0.730182	0.54	3.08943	5.2498	6.17887	7.2668
1663	181.543	1	0	667.394	32.0376	0.437604	32.2939	0.263303	21.0939	0.533009	0.35	4.97481	5.96369	9.94962	8.47767
1664	377.509	1	0	2792.08	37.8389	1.04122	135.174	0.134408	40.0426	0.0706553	0.02	10.6185	3.95147	21.237	5.8919
1665	529.831	1	0	929.451	37.9992	0.255993	92.0602	0.555869	46.9039	0.342112	0.2	7.14547	5.90615	14.2909	9.00201
1666	271.482	1	0.00260181	672.615	15.3264	0.672725	100.659	0.397456	6.50904	0.80339	0.6	2.44666	4.85189	4.89333	6.19163
1667	492.241	1	0	917.513	33.8178	0.467451	88.2573	0.524995	32.1085	0.433778	0.15	6.85971	6.02528	13.7194	7.99894
1668	645.369	1	0	1017.01	37.0573	0.747832	84.9554	0.62461	39.5814	0.0418073	0.03	10.4171	4.13657	20.8342	6.1594
1669	123.192	1	0	2448.55	34.1082	0.82903	76.7445	0.0498352	31.1514	0.532119	0.29	5.33316	6.06788	10.6663	8.15021
1670	103.61	1	0	3783.38	39.5017	0.454298	63.3508	0.0272226	21.4628	0.278042	0.08	8.42588	5.54254	16.8518	7.66342
1671	283.619	1	0	545.54	35.0654	0.453981	33.3755	0.498963	44.0268	0.503177	0.22	6.09498	5.981	12.19	8.25005
1672	310.107	1	0	1140.99	35.7725	0.467879	67.6396	0.266714	36.7439	0.371531	0.14	7.03206	6.04279	14.0641	7.96987
1673	424.967	1	0	676.916	30.5446	0.532877	77.3816	0.609205	30.8749	0.544961	0.35	4.94165	5.9223	9.88331	8.4782
1674	389.873	1	0	1126.71	37.5368	0.391181	72.5609	0.339619	44.5504	0.271277	0.08	8.13941	5.6749	16.2788	7.70248
1675	134.415	1	0	750.553	37.2221	0.551387	21.0257	0.173428	32.961	0.478982	0.21	6.36518	6.00685	12.7304	8.36157
1676	224.878	1	0	1705.43	38.268	0.403494	81.7226	0.129909	48.0172	0.335512	0.24	6.33353	5.96074	12.6671	8.89291
1677	328.346	1	0.0151378	882.384	22.6948	0.757235	115.192	0.36551	16.541	0.693987	0.5	3.37696	5.45268	6.75392	7.41794
1678	372.92	1	0	555.986	33.3097	0.55727	31.8323	0.652017	10.6499	0.230647	0.04	8.67351	5.42335	17.347	6.94326
1679	152.598	1	9.52011	231.685	2.28017	0.0147332	121.287	0.652891	28.4324	0.963726	0.98	0.122486	1.22268	0.244972	1.72473
1680	292.346	1	0	1980.31	37.3678	0.578548	89.2785	0.146167	22.0248	0.174212	0.06	8.79517	5.41731	17.5903	7.47946
1681	93.1935	1	0.00229063	957.462	22.8971	0.39577	51.7086	0.0955121	25.0533	0.747417	0.66	2.31704	4.66538	4.63408	6.95391
1682	344.524	1	0.000786801	954.065	25.6289	0.241936	138.915	0.35396	28.0317	0.627951	0.58	3.17665	5.33685	6.35329	8.33735
1683	216.45	1	3.39629	371.671	8.22383	0.123941	97.3913	0.571531	19.8926	0.947128	0.9	0.656139	2.74067	1.31228	4.0662
1684	536.397	1	0	796.637	30.7437	0.550479	102.504	0.657161	27.6558	0.558662	0.27	5.57353	6.09718	11.1471	8.32748
1685	194.345	1	0	3430.25	36.4353	1.13587	84.9565	0.0564091	12.5078	0.0242894	0.02	10.7024	3.79847	21.4048	5.66027
1686	51.5785	1	0	5351.98	31.2462	0.426336	108.918	0.00959365	28.5021	0.645614	0.53	3.45613	5.4529	6.91226	8.15802
1687	114.373	1	3.61602	234.857	7.97248	0.193746	24.4668	0.473288	7.1539	0.938221	0.89	0.71197	2.83306	1.42394	4.20713
1688	148.36	1	0.00403817	1138.13	17.9449	0.374557	122.625	0.128746	21.3566	0.736855	0.71	1.8617	4.37742	3.7234	6.12276
1689	406.501	1	0	1121.86	37.4481	0.55575	87.7192	0.354911	38.4767	0.399803	0.2	6.97561	5.99518	13.9512	8.87789
1690	251.758	1	0.00845533	377.522	17.9724	0.289051	63.7324	0.642945	28.1259	0.824282	0.7	1.96226	4.53087	3.92453	6.22811
1691	269.882	1	0	524.212	33.9156	0.525776	24.4195	0.497205	10.9349	0.299814	0.1	7.6646	5.88725	15.3292	7.79029
1692	387.534	1	0.041636	576.951	18.0086	0.437513	112.349	0.657235	9.95126	0.796627	0.61	2.65771	5.03911	5.31543	7.21576
1693	665.425	1	0	1103.55	34.6319	0.31631	131.076	0.592487	38.1417	0.3032	0.12	7.54085	5.84909	15.0817	7.82338
1694	235.906	1	5.62862	368.72	5.43167	0.0641949	126.121	0.633067	5.24408	0.9337	0.87	0.757552	2.89068	1.5151	3.95438
1695	67.2077	1	0.00104687	398.07	16.418	0.300721	24.0083	0.163309	18.9524	0.869661	0.76	1.47532	3.92282	2.95063	5.40647
1696	506.514	1	0	1127.62	36.3886	0.677592	77.4774	0.442719	26.3311	0.110563	0.02	9.95298	4.68974	19.906	6.43607
1697	114.49	1	0.000510107	791.355	23.4981	0.347379	46.0118	0.141419	21.8096	0.752841	0.61	2.63604	4.92413	5.27208	7.13781
1698	168.181	1	0	2830.07	37.2167	0.663715	75.9111	0.0590062	18.2522	0.274975	0.06	8.52831	5.52776	17.0566	7.319
1699	233.616	1	0.00169843	600.192	24.4565	0.421407	62.9728	0.37757	30.1029	0.716332	0.58	2.95631	5.22613	5.91262	7.54287
1700	176.246	1	0	1988.4	35.0891	0.782247	47.5363	0.0879719	6.15521	0.105515	0.02	10.0231	4.55745	20.0462	6.21701
1701	111.058	1	0	4455.97	35.7387	0.397024	135.505	0.02478	33.0092	0.549648	0.37	4.97404	5.94537	9.94807	8.88124
1702	151.479	1	0.0142484	257.368	17.3418	0.40413	20.8818	0.561347	5.51495	0.737977	0.62	2.43007	4.82345	4.86014	6.61218
1703	272.29	1	0	981.754	38.6922	0.532596	39.7014	0.271644	17.2043	0.137596	0.09	9.03394	5.23554	18.0679	7.94136
1704	163.154	1	0.00190199	778.937	26.223	0.317722	46.145	0.204505	9.56409	0.704794	0.51	3.68206	5.53467	7.36411	8.40143
1705	229.086	1	0.0081573	455.159	23.499	0.502945	54.6539	0.483647	37.3466	0.765412	0.65	2.49745	4.96261	4.99489	7.44444
1706	330.379	1	0	467.186	36.9143	0.711112	25.1201	0.677028	21.7381	0.266647	0.1	8.05827	5.66677	16.1165	8.06265
1707	210.291	1	0	857.109	35.7081	0.507707	33.851	0.239352	14.2985	0.299977	0.16	7.11564	5.93541	14.2313	8.45159
1708	607.767	1	0	1486.97	35.6293	0.456718	134.288	0.403999	18.8841	0.19254	0.06	9.11222	5.27692	18.2244	7.42845
1709	614.761	1	0	1298.7	34.6512	0.609212	107.881	0.468105	19.3667	0.140173	0.02	10.0252	4.47142	20.0503	6.12625
1710	116.784	1	0.0030514	539.577	23.5743	0.39788	32.0478	0.209308	23.5425	0.787168	0.62	2.59896	5.0018	5.19791	7.14506
1711	129.237	1	0	702.745	32.2542	0.657045	29.99	0.177773	43.9733	0.646676	0.46	4.01017	5.68669	8.02035	8.39239
1712	122.619	1	0	677.795	30.4516	0.567182	31.7208	0.174843	46.605	0.673547	0.53	3.46878	5.54058	6.93755	8.17356
1713	244.707	1	0	865.581	29.8791	0.476827	65.5453	0.275938	27.9004	0.570575	0.42	4.32078	5.73631	8.64157	8.33729
1714	395.358	1	0	1239.41	36.713	0.414276	92.5172	0.313311	48.1194	0.369435	0.16	7.12622	5.9376	14.2524	8.20704
1715	213.845	1	0	411.295	31.2603	0.453808	27.7915	0.492339	48.9732	0.650735	0.45	4.10523	5.82584	8.21047	8.30603
1716	258.367	1	0	1806.14	27.4968	1.01336	139.947	0.141603	20.6419	0.575502	0.35	4.52155	5.81473	9.0431	7.58783
1717	307.448	1	0	1498.64	33.0307	0.509246	124.662	0.202043	38.5449	0.542656	0.36	4.98632	5.97289	9.97265	8.77972
1718	81.6634	1	1.11526	1014.53	10.6823	0.0249298	121.051	0.0797358	40.5461	0.943219	0.89	0.676577	2.81848	1.35315	3.87855
1719	249.523	1	0	3760.86	34.141	0.613774	122.18	0.0661158	8.69375	0.0389457	0	10.4847	3.98666	20.9695	5.41226
1720	166.558	1	0	899.687	39.0624	0.743414	20.8391	0.181145	27.1402	0.147714	0.04	9.63846	4.68655	19.2769	6.75783
1721	417.718	1	0	794.067	30.1215	0.418708	103.745	0.512122	42.8473	0.594804	0.44	4.26382	5.79244	8.52765	8.6155
1722	589.191	1	0	1631	36.335	0.895291	120.641	0.358016	30.508	0.0113345	0.02	10.8143	3.74703	21.6285	5.68608
1723	204.655	1	0.0117053	726.749	13.3534	0.137605	130.316	0.277678	14.3488	0.871229	0.74	1.53968	4.00733	3.07935	5.24314
1724	86.2076	1	0	1553.34	14.3066	0.172566	106.726	0.0551117	5.64589	0.87305	0.72	1.70681	4.25636	3.41362	5.52549
1725	266.097	1	0	657.164	24.9473	0.592855	70.6962	0.393916	37.0892	0.718593	0.51	3.29634	5.37841	6.59268	7.27197
1726	479.212	1	0	1776.51	36.1138	0.831548	107.669	0.267546	44.5195	0.0471576	0	10.7429	3.90264	21.4857	5.26299
1727	296.724	1	0	527.582	36.0198	0.790633	19.4021	0.547372	15.9206	0.0352713	0.01	10.757	3.8941	21.5139	5.57264
1728	125.695	1	0.00377799	1411.02	23.1601	0.384265	105.959	0.0879193	37.6476	0.785316	0.67	2.25999	4.62305	4.51998	7.02734
1729	220.729	1	0.00201378	687.274	16.4455	0.385956	129.699	0.315067	43.6299	0.872119	0.75	1.57076	4.09074	3.14152	5.58994
1730	284.483	1	0.0719504	513.511	12.6326	0.389476	126.762	0.54388	10.3911	0.798507	0.76	1.54077	4.09664	3.08154	5.7307
1731	257.804	1	0	634.221	31.6923	0.606128	45.4339	0.392763	29.9367	0.556867	0.37	4.76331	6.00577	9.52662	8.55514
1732	107.205	1	5.85842	456.468	5.0924	0.0908668	69.5681	0.232513	27.5802	0.960698	0.95	0.287223	1.80314	0.574446	2.52365
1733	108.934	1	0.00831083	838.576	12.9933	0.145349	110.896	0.128256	26.1744	0.911399	0.81	1.11192	3.45644	2.22383	4.63863
1734	624.3	1	0	906.1	30.3839	0.426861	118.182	0.675928	10.3393	0.447791	0.24	6.4325	5.99297	12.865	8.95627
1735	428.298	1	0	1142.57	30.905	0.522188	89.7508	0.369622	5.3826	0.374866	0.16	7.36483	5.89212	14.7297	8.5454
1736	330.243	1	0	1229.7	36.5987	1.02466	50.5204	0.265353	40.3876	0.029868	0.01	10.8802	3.65632	21.7603	5.16517
1737	323.91	1	0	1052.17	39.4429	0.606927	63.3659	0.30069	33.3639	0.327488	0.21	7.19636	5.93846	14.3927	9.32444
1738	444.236	1	0	1701.75	35.0473	0.620541	108.973	0.258582	11.8355	0.126182	0.04	9.41343	5.02276	18.8269	7.0628
1739	269.349	1	0.00153771	404.53	24.0028	0.322452	51.2628	0.636805	41.9165	0.796359	0.6	2.78123	5.12682	5.56246	7.34974
1740	211.517	1	0	1111.42	39.968	0.5147	42.902	0.186078	46.1846	0.282046	0.16	7.33927	5.8606	14.6785	8.61861
1741	403.038	1	0	682.762	33.9282	0.659041	41.5491	0.576621	6.26126	0.21735	0.08	8.86227	5.31762	17.7245	7.84495
1742	41.0354	1	0.00100383	3408.98	19.8079	0.348454	110.269	0.01198	31.7946	0.83728	0.72	1.72903	4.21901	3.45805	5.69158
1743	441.104	1	0	964.567	30.6032	0.389376	75.6154	0.450107	5.46832	0.288456	0.12	7.58661	5.87959	15.1732	8.1181
1744	228.034	1	0	3133.85	32.0449	0.698911	117.266	0.0724083	6.23652	0.266698	0.05	8.30714	5.50372	16.6143	6.83638
1745	330.93	1	0.00557883	1202.58	24.4113	0.805002	130.464	0.271531	13.374	0.589808	0.4	4.12088	5.71787	8.24176	7.5607
1746	335.451	1	0	1302.36	36.8931	0.430645	66.5668	0.253834	18.0814	0.308296	0.07	8.85998	5.32379	17.72	7.56916
1747	467.858	1	0	1639.47	32.1414	0.541601	123.545	0.282735	7.87209	0.221294	0.07	8.42635	5.45936	16.8527	7.37967
1748	238.03	1	0	790.307	36.7553	0.563657	25.5077	0.294853	7.85986	0.134134	0.05	9.89016	4.72657	19.7803	7.07491
1749	358.778	1	0	1018.9	40.9767	0.524019	56.1812	0.344167	37.4874	0.210722	0.12	8.71201	5.37113	17.424	8.55152
1750	322.235	1	0	854.501	38.9993	0.551016	43.628	0.367577	47.9239	0.230825	0.08	8.42724	5.4598	16.8545	7.74802
1751	274.781	1	0	1217.59	33.4115	0.547459	77.9967	0.221695	41.8895	0.482559	0.24	5.77241	5.99427	11.5448	7.97634
1752	497.703	1	0	871.914	32.3886	0.856365	58.326	0.562884	7.7298	0.108348	0.01	10.0503	4.31223	20.1007	5.81592
1753	226.6	1	0	916.729	36.4128	0.358054	42.7673	0.241021	26.2367	0.375902	0.22	6.48787	6.03897	12.9757	8.7077
1754	341.33	1	0	849.201	36.788	0.592853	44.3642	0.393017	38.9437	0.197279	0.05	8.75139	5.3285	17.5028	6.92665
1755	223.734	1	0.920798	547.064	10.6275	0.11598	123.889	0.402956	10.7268	0.861247	0.79	1.23504	3.62414	2.47007	4.82908
1756	233.399	1	0	2127.77	37.5751	0.349745	81.7974	0.108615	15.8118	0.207367	0.09	8.23524	5.65709	16.4705	8.16285
1757	215.484	1	0	3308.05	40.3306	0.567368	103.882	0.0647155	39.3258	0.170604	0.06	9.33876	4.96695	18.6775	7.34398
1758	166.824	1	3.71162	506.867	6.76313	0.0528294	102.672	0.325122	48.5269	0.972742	0.93	0.405095	2.14244	0.81019	2.98244
1759	338.314	1	0	1286.11	26.9617	0.476978	108.873	0.25979	5.73258	0.440456	0.3	5.40678	5.96135	10.8136	8.55444
1760	224.484	1	1.40923	425.063	10.571	0.171044	99.0024	0.517707	16.5029	0.890097	0.83	1.04843	3.45867	2.09687	4.67173
1761	176.782	1	0	2753.38	37.8067	0.464636	66.1697	0.0637932	21.1362	0.157958	0.02	10.0121	4.46216	20.0242	6.26714
1762	143.095	1	0.0905636	222.655	12.6761	0.363056	27.5549	0.615855	5.71549	0.786925	0.77	1.48984	3.97029	2.97968	5.68783
1763	328.942	1	0	2194.43	38.9685	0.558709	109.028	0.148478	36.124	0.218392	0.07	8.98343	5.12343	17.9669	7.56516
1764	27.6411	1	0	4643.57	29.9348	0.5866	64.1813	0.00592134	42.4805	0.780768	0.62	2.72516	5.01396	5.45032	7.61414
1765	308.248	1	0	1529.63	35.5791	0.99642	58.3727	0.199737	47.0856	0.0250479	0	10.9672	3.35789	21.9345	4.635
1766	187.176	1	2.22433	529.001	9.58676	0.0906672	108.896	0.348212	33.2726	0.946662	0.88	0.730933	2.9052	1.46187	3.98577
1767	133.246	1	0	1063.25	39.482	0.379825	29.9604	0.122233	41.1342	0.436381	0.25	6.31817	6.00334	12.6363	8.96205
1768	603.469	1	0	1569.04	33.3417	0.930196	123.233	0.38158	9.49134	0.0441258	0.02	10.4425	3.96063	20.8851	5.84577
1769	172.568	1	0	735.114	39.3967	0.764922	21.9876	0.227301	26.1966	0.289194	0.15	7.65263	5.79803	15.3053	8.49461
1770	187.502	1	0	3330.02	38.3758	0.341816	106.245	0.0559306	45.4365	0.302397	0.08	7.9967	5.68387	15.9934	7.49095
1771	97.3335	1	0	1049.07	38.5195	0.411619	21.3711	0.0905584	24.1943	0.396089	0.23	6.38837	5.95316	12.7767	8.77996
1772	367.907	1	0	741.156	30.4998	0.305263	78.211	0.482583	31.8022	0.552444	0.39	4.64302	5.85854	9.28604	8.5665
1773	247.615	1	0	1412.74	29.5263	0.239777	125.679	0.172584	36.3567	0.599595	0.5	3.75435	5.57758	7.50871	8.52325
1774	335.979	1	0	754.217	36.1923	0.494908	49.9777	0.432448	22.4974	0.476811	0.23	6.7426	5.91209	13.4852	9.01571
1775	193.228	1	1.35632	500.715	9.93943	0.0596092	119.935	0.379463	27.8788	0.909744	0.86	0.826868	3.03298	1.65374	4.13637
1776	148.847	1	2.56277	397.523	9.02134	0.0983932	64.8521	0.367554	11.4513	0.929478	0.86	0.845131	3.09825	1.69026	4.22521
1777	522.767	1	0	794.213	29.8835	0.764381	117.962	0.641671	34.5484	0.590291	0.38	4.70027	5.99685	9.40054	8.59733
1778	263.001	1	0	3287.24	37.4737	0.434854	133.76	0.079526	14.2879	0.178316	0.09	8.80081	5.28202	17.6016	7.8532
1779	585.038	1	0	1002.69	36.238	0.419452	85.1614	0.573349	34.8734	0.163459	0.04	9.27235	5.07465	18.5447	6.84497
1780	231.124	1	0	485.062	25.8507	0.32519	50.8601	0.457567	42.4998	0.750455	0.6	2.89968	5.12337	5.79936	7.77063
1781	467.524	1	0	930.688	37.2641	0.336367	79.5967	0.490411	46.8833	0.304178	0.16	7.31056	5.84636	14.6211	8.43949
1782	281.292	1	0	429.592	26.2964	0.54438	44.4182	0.626829	43.3107	0.634321	0.47	3.56762	5.48535	7.13524	7.39317
1783	534.749	1	0	902.872	31.3757	0.319043	125.734	0.578753	41.8443	0.555377	0.33	5.14008	6.02325	10.2802	8.52238
1784	570.842	1	0	843.54	30.2165	0.696754	122.64	0.661275	37.1082	0.495855	0.3	5.2558	6.04406	10.5116	8.1544
1785	546.123	1	0	916.95	30.2556	0.428044	122.241	0.583332	31.4885	0.484189	0.27	5.49628	5.94197	10.9926	8.0662
1786	85.7602	1	0	1561.3	40.4825	0.581135	19.6309	0.0541634	26.2354	0.182799	0.05	9.21336	4.97242	18.4267	7.10835
1787	144.744	1	6.05236	412.76	5.20416	0.110509	138.187	0.346964	10.6081	0.926811	0.94	0.400114	2.10947	0.800229	3.32155
1788	682.18	1	0	1148.87	33.5746	0.506467	127.071	0.585167	14.5715	0.314878	0.09	8.32626	5.5831	16.6525	7.81499
1789	181.32	1	2.82185	512.586	8.86584	0.0571563	112.747	0.348849	11.7805	0.925317	0.86	0.860172	3.15424	1.72034	4.30166
1790	467.93	1	0	1944.44	32.3142	0.501269	124.42	0.239125	6.13229	0.12517	0.01	9.9541	4.67731	19.9082	6.09298
1791	268.983	1	0	486.493	36.5306	0.702418	18.4244	0.533432	14.7074	0.129506	0.04	9.38674	4.99753	18.7735	6.92125
1792	232.313	1	0.0508644	677.188	22.6661	0.672725	58.7103	0.335366	5.98798	0.654117	0.51	3.56987	5.49019	7.13974	8.19732
1793	220.11	1	0	2060.95	26.5988	0.552461	133.307	0.105909	6.72624	0.567059	0.38	4.62265	5.88186	9.24531	8.38392
1794	316.549	1	0	2532.15	37.4128	0.598197	113.805	0.124117	22.8821	0.101753	0.04	9.57914	4.80368	19.1583	6.86732
1795	305.802	1	0	2666.6	37.9473	0.432193	129.387	0.11379	31.6519	0.20547	0.07	8.56657	5.41639	17.1331	7.59462
1796	673.689	1	0	1194.78	32.2716	0.97015	104.221	0.558574	7.41167	0.0881136	0.02	10.4804	4.08302	20.9607	5.69645
1797	258.949	1	0.000728111	1002.95	25.8853	0.903479	81.2719	0.253815	9.56097	0.559067	0.41	4.30301	5.77475	8.60601	8.14599
1798	275.016	1	0	1321.69	31.6152	0.569793	67.6468	0.205425	7.98697	0.356342	0.12	7.26674	5.80676	14.5335	7.65401
1799	73.4407	1	0	2262.26	27.2209	0.472424	82.3431	0.0321543	42.2637	0.785929	0.61	2.73763	5.03663	5.47526	7.4345
1800	418.17	1	0	1047.54	26.8993	0.591418	119.521	0.392813	13.7802	0.597882	0.32	4.94031	5.91422	9.88063	7.98762
1801	184.647	1	0	664.491	32.1637	0.501996	38.6061	0.268286	47.5788	0.61871	0.43	4.20337	5.70668	8.40674	8.44075
1802	188.787	1	0	882.551	37.5295	0.746851	27.2447	0.208901	38.37	0.245076	0.06	8.18115	5.54851	16.3623	7.18484
1803	387.541	1	0	1450.12	32.674	0.402383	113.278	0.263745	7.88234	0.441632	0.24	6.7069	6.01112	13.4138	9.36111
1804	333.146	1	0	480.178	33.4546	0.262818	43.6283	0.660921	44.845	0.572844	0.4	4.7848	5.84519	9.5696	9.02107
1805	85.8607	1	0	3310.89	34.0479	0.380271	83.5783	0.0257401	36.2206	0.582402	0.38	4.62468	5.83257	9.24937	8.29319
1806	217.979	1	0.00116044	333.343	14.2336	0.332263	80.1096	0.631498	47.8428	0.856531	0.81	1.19907	3.61651	2.39815	5.09192
1807	135.112	1	0.0142199	1170.35	19.3582	0.317228	118.749	0.113911	27.7809	0.831442	0.74	1.79391	4.29792	3.58783	6.46135
1808	98.3653	1	0	1108.52	38.908	0.459334	24.0321	0.0866434	27.7833	0.526313	0.27	6.06886	6.06296	12.1377	9.05766
1809	330.576	1	0	601.841	28.1368	0.542706	66.3032	0.531452	43.9854	0.668342	0.43	3.97713	5.64478	7.95426	7.8373
1810	218.722	1	0	2671.79	40.4706	0.56832	100.76	0.0811131	30.1148	0.280942	0.16	7.872	5.78377	15.744	8.81066
1811	319.852	1	0.0193837	520.395	16.7175	0.280801	129.141	0.59933	26.511	0.857352	0.75	1.71483	4.19101	3.42965	6.39061
1812	174.531	1	0	3072.87	38.8724	0.718399	72.3991	0.0564538	48.5687	0.0994453	0.02	10.0862	4.40861	20.1724	6.03381
1813	132.139	1	0.0135689	438.807	23.2077	0.48734	26.1834	0.289644	10.9898	0.759402	0.58	2.90132	5.13087	5.80265	7.59018
1814	111.066	1	8.14999	405.463	4.03053	0.0214998	116.848	0.271555	15.4896	0.96769	0.96	0.251591	1.7668	0.503182	2.47928
1815	111.143	1	0	1504.53	26.6778	0.509894	68.0952	0.0729015	31.7472	0.710858	0.5	3.3197	5.36086	6.6394	7.24871
1816	303.856	1	0	1310.51	34.5396	0.850839	50.1006	0.229588	14.807	0.0490754	0	10.7811	3.70635	21.5621	5.06009
1817	76.3923	1	9.34359	314.237	2.34125	0.00794929	128.068	0.241494	14.4526	0.975383	0.98	0.124157	1.24064	0.248314	1.75008
1818	247.161	1	0	826.978	25.8934	0.605819	90.7568	0.29186	45.7853	0.730753	0.57	3.01273	5.17939	6.02546	7.67
1819	89.7257	1	4.41489	405.191	5.30548	0.00890149	44.6546	0.218775	29.1771	0.968631	0.95	0.283924	1.78995	0.567848	2.50546
1820	168.32	1	0	2139.74	30.9956	0.547486	120.374	0.0778313	38.5322	0.612582	0.45	4.05528	5.69165	8.11056	8.3018
1821	65.5379	1	0	4189.89	28.2917	0.940482	106.412	0.015563	12.304	0.743966	0.51	3.5171	5.46732	7.0342	8.04783
1822	138.498	1	3.0283	198.12	8.05713	0.0609106	21.386	0.675997	7.64359	0.940919	0.86	0.819	3.00459	1.638	4.09771
1823	350.712	1	0.000884452	785.469	26.9138	0.528477	110.225	0.435283	48.9111	0.724809	0.54	3.33622	5.45097	6.67245	8.00779
1824	385.448	1	0	1626.97	35.3575	0.529555	113.916	0.233969	13.3099	0.35689	0.18	7.4475	5.8252	14.895	8.86885
1825	444.523	1	0	1567.37	33.3658	0.638169	135.474	0.280135	12.1791	0.339799	0.2	6.95873	5.91004	13.9175	8.87289
1826	521.088	1	0	874.097	36.608	0.480308	72.3246	0.582982	38.3144	0.185294	0.07	8.43657	5.46502	16.8731	7.51503
1827	197.285	1	0	2315.62	31.5339	0.80195	100.066	0.0844994	21.1475	0.430653	0.17	6.20268	6.01289	12.4054	7.2325
1828	83.5438	1	0	641.283	30.3809	0.505796	17.7232	0.125883	29.8261	0.653719	0.43	4.0013	5.73993	8.00261	7.711
1829	347.903	1	0	585.648	38.8118	0.534508	28.3176	0.574676	47.3084	0.152619	0.03	9.53491	5.00284	19.0698	6.8757
1830	446.1	1	0	885.603	33.5563	0.33947	93.2595	0.491387	45.7703	0.565411	0.28	5.66091	6.00601	11.3218	8.53721
1831	179.279	1	0.00065265	631.209	14.8344	0.262474	122.797	0.27857	49.9988	0.905033	0.8	1.23782	3.63128	2.47563	5.10926
1832	109.242	1	8.95429	288.241	2.63782	0.0420676	125.685	0.376012	13.0024	0.985414	0.97	0.17676	1.43656	0.353521	2.02117
1833	68.0332	1	0.630292	1179.05	11.173	0.303823	109.137	0.0572519	7.75683	0.909201	0.85	0.956161	3.26017	1.91232	4.72226
1834	362.903	1	0	596.747	38.4733	0.503383	35.1625	0.586319	46.3719	0.278655	0.1	8.13412	5.63803	16.2682	7.92543
1835	671.377	1	0	1204.13	35.2178	0.402045	116.028	0.550077	25.8786	0.163764	0.03	9.41641	5.01565	18.8328	6.7291
1836	398.383	1	0.00145118	1239.91	25.3193	0.441569	132.755	0.317396	5.27997	0.570242	0.36	5.03481	5.90524	10.0696	8.74289
1837	334.84	1	0	849.79	30.5866	0.467417	74.8305	0.384783	17.8429	0.608848	0.35	5.08672	5.96441	10.1734	8.75636
1838	125.45	1	0	2194.03	34.2606	0.44994	61.0218	0.0566096	8.5045	0.461961	0.25	6.11741	6.04832	12.2348	8.87583
1839	388.989	1	0.0386378	624.112	19.9642	0.491942	113.506	0.609342	14.3182	0.692708	0.58	2.85059	5.1053	5.70117	7.31054
1840	162.28	1	0.0032804	271.104	15.2874	0.209333	47.0776	0.571497	47.3462	0.903579	0.81	1.2182	3.57601	2.4364	5.26848
1841	488.676	1	4.79671e-05	759.658	24.8809	0.652305	137.185	0.628689	28.147	0.629385	0.49	3.62275	5.49769	7.24551	7.90377
1842	335.639	1	0	745.893	39.723	0.691958	36.4797	0.437405	37.9974	0.136331	0.07	9.13825	5.21625	18.2765	7.66607
1843	169.934	1	0.0129966	1062.32	16.316	0.398678	127.628	0.158106	9.62501	0.813153	0.71	1.91322	4.4108	3.82644	6.37171
1844	510.525	1	0	771.923	35.4788	0.354554	82.621	0.642405	47.1729	0.458935	0.23	6.34665	6.03313	12.6933	8.73279
1845	212.322	1	0.0118618	1261.41	23.7922	0.6225	105.055	0.166095	10.7763	0.692141	0.51	3.44193	5.414	6.88386	7.83629
1846	196.444	1	0	1367.56	33.1629	0.45417	62.0434	0.141424	15.5618	0.477726	0.26	5.83979	6.06598	11.6796	8.5176
1847	149.752	1	4.60589	383.145	6.97163	0.0880662	23.2489	0.38354	42.8196	0.941391	0.95	0.351721	2.00805	0.703441	3.24584
1848	210.473	1	0	728.635	39.057	0.49626	29.0692	0.279246	48.6442	0.346441	0.18	6.98635	5.88464	13.9727	8.53166
1849	158.208	1	0	677.019	34.1972	0.636147	29.3877	0.225502	44.349	0.565873	0.36	4.81796	5.93746	9.63592	8.51368
1850	52.3093	1	0	1504.39	35.0681	0.991076	18.9778	0.0342276	19.9786	0.46053	0.24	5.59153	5.99128	11.1831	7.90832
1851	465.976	1	0	891.486	36.7164	0.418276	72.8321	0.510411	43.0402	0.262068	0.12	7.62962	5.65763	15.2592	8.0374
1852	385.177	1	0.00164416	727.956	23.6655	0.76402	107.118	0.517285	29.8879	0.708929	0.47	3.50392	5.45733	7.00784	7.14317
1853	441.262	1	0	1692.58	34.5251	0.958227	97.533	0.258608	35.3698	0.034568	0	10.4056	3.94358	20.8112	5.04081
1854	183.44	1	0.00502169	280.38	21.5991	0.544321	29.5873	0.616552	45.7103	0.855024	0.66	2.22679	4.70117	4.45358	6.5929
1855	244.748	1	0.0198846	842.774	17.0058	0.569281	101.09	0.2865	5.54549	0.798912	0.57	2.75449	5.07372	5.50898	6.70944
1856	101.539	1	0.000410154	333.103	13.8419	0.224615	40.7561	0.29453	29.9671	0.917409	0.82	1.09809	3.40779	2.19619	4.84976
1857	336.139	1	0	872.347	33.273	0.477304	68.9582	0.375888	31.2841	0.524001	0.27	5.68235	6.02374	11.3647	8.51756
1858	459.315	1	0	1617.73	34.5219	0.680616	138.659	0.280455	31.316	0.404007	0.13	7.25111	5.86205	14.5022	7.86828
1859	130.161	1	0	250.629	15.5505	0.114172	30.2978	0.494211	41.5677	0.900483	0.76	1.40359	3.83022	2.80717	5.05069
1860	143.884	1	0	2026.8	30.4504	0.751497	105.501	0.0701956	45.4993	0.688969	0.48	3.74414	5.561	7.48828	8.09825
1861	175.795	1	0.0151895	330.45	18.6821	0.358502	45.0444	0.508379	35.107	0.830967	0.76	1.6685	4.15514	3.337	6.35285
1862	304.123	1	0	1057.39	37.9595	1.00673	40.6948	0.283158	47.7982	0.0419046	0.02	10.6571	3.96551	21.3143	5.65041
1863	268.089	1	0.0216328	685.551	18.8473	0.340666	110.635	0.383007	19.6629	0.787141	0.67	2.22027	4.69585	4.44053	6.75541
1864	313.591	1	0	1345.6	37.2759	0.54177	59.9501	0.229931	36.5897	0.140658	0.03	9.51295	4.76226	19.0259	6.48204
1865	238.23	1	0	1446.7	32.2152	0.460978	82.657	0.16232	20.3416	0.476677	0.26	5.63022	6.02505	11.2604	8.2652
1866	153.329	1	0	1795.75	40.2315	0.541459	39.493	0.084381	13.6523	0.130642	0.09	9.43833	4.95488	18.8767	7.8386
1867	523.696	1	0	1018.94	32.6776	0.9958	68.0652	0.508256	11.7946	0.016549	0	10.6202	3.74404	21.2404	5.01804
1868	379.354	1	0	1241.22	29.928	0.491435	132.162	0.300706	22.3405	0.486217	0.38	4.80186	5.91863	9.60372	8.6698
1869	284.132	1	0	1294.41	37.0575	0.509624	69.1237	0.215718	42.7956	0.308335	0.14	7.16279	5.90526	14.3256	8.09659
1870	72.9744	1	0	1950.46	34.4193	1.1874	17.4441	0.0371813	11.9124	0.0296979	0	11.1078	3.0781	22.2156	4.11256
1871	3.37471	1	9.58223e-06	2827.26	16.0648	0.148724	17.2074	0.00118752	34.0891	0.952297	0.88	0.755658	2.88251	1.51132	4.30057
1872	43.1733	1	0.0011728	4447.47	25.8072	0.66446	83.9427	0.00966488	8.73208	0.740443	0.54	3.11934	5.30468	6.23868	7.45268
1873	198.513	1	0	2874.74	36.1365	0.416657	112.144	0.0685228	20.6557	0.383819	0.17	6.91724	6.01166	13.8345	8.34855
1874	128.357	1	0.00387543	639.871	15.5835	0.341631	70.2596	0.196772	14.8733	0.855238	0.75	1.5695	4.00139	3.139	5.71897
1875	514.847	1	0	800.99	33.9033	0.700615	56.9173	0.631409	8.92741	0.121622	0.03	9.74985	4.72505	19.4997	6.7105
1876	56.1672	1	0	3772.48	27.6215	0.834344	65.4053	0.0148149	6.54622	0.529399	0.35	4.41587	5.8034	8.83173	7.35176
1877	259.914	1	0.0282658	441.744	18.7073	0.42745	77.1907	0.569309	24.0437	0.81636	0.72	1.95432	4.42286	3.90864	6.79129
1878	110.47	1	1.36894	307.829	9.88629	0.0881555	25.6689	0.345026	28.6256	0.934214	0.88	0.707967	2.82203	1.41593	3.87241
1879	216.847	1	0	1692.94	27.5256	0.604156	137.869	0.12657	26.7597	0.66015	0.5	3.60432	5.54589	7.20864	8.10382
1880	172.456	1	0.00838043	1456.89	23.3354	0.78076	100.426	0.117042	11.1317	0.735689	0.5	3.38551	5.458	6.77102	7.37957
1881	380.738	1	0	1050.01	32.9104	0.503542	96.8225	0.35522	37.0559	0.563219	0.28	5.54096	6.04834	11.0819	8.46909
1882	408.945	1	0	874.073	32.6718	0.547855	87.8413	0.45648	48.8494	0.556948	0.28	5.4387	6.00009	10.8774	8.24758
1883	157.598	1	0	1005.2	33.9703	0.369385	32.3168	0.153603	13.3406	0.435118	0.17	6.57885	5.94537	13.1577	8.04042
1884	345.29	1	0	2512.61	38.3904	0.392958	124.29	0.136369	39.1445	0.117279	0.04	9.48867	4.82294	18.9773	6.92451
1885	364.404	1	0.00222398	785.193	23.9253	0.675049	118.324	0.454006	35.216	0.672613	0.52	3.23841	5.36012	6.47682	7.31913
1886	396.946	1	0.000743101	1006.65	26.1469	0.546273	132.96	0.387375	16.8223	0.619792	0.46	4.04393	5.73188	8.08787	8.39232
1887	405.856	1	0	870.232	37.271	0.384108	65.1565	0.45447	48.0757	0.358052	0.15	7.23593	5.90975	14.4719	8.33469
1888	235.095	1	0	589.383	25.8722	0.507663	60.3486	0.385928	33.2876	0.76381	0.58	3.04306	5.2311	6.08612	7.90397
1889	130.205	1	0	2872.82	36.186	0.391342	91.3557	0.044931	34.9836	0.437668	0.29	5.56038	6.07318	11.1208	8.61901
1890	514.773	1	0	789.194	25.1546	0.696765	126.536	0.638887	17.3229	0.573392	0.4	4.3078	5.78039	8.6156	7.93044
1891	164.768	1	0.00769886	1032.13	21.2416	0.334209	96.7257	0.157124	27.3192	0.785197	0.64	2.36541	4.76561	4.73083	6.70163
1892	339.163	1	0	1154.21	35.879	0.372411	64.4143	0.288966	19.3854	0.300455	0.09	8.18671	5.61884	16.3734	7.71994
1893	397.696	1	0	1155.59	30.861	0.537362	121.195	0.338108	30.75	0.538816	0.32	5.10332	5.92436	10.2066	8.37381
1894	223.954	1	0	1406.76	37.8369	0.522476	51.4179	0.156824	29.982	0.277256	0.08	8.2683	5.54248	16.5366	7.56646
1895	168.407	1	0	2459.7	34.8506	0.451683	92.2279	0.0678415	29.691	0.447419	0.22	6.0964	5.90018	12.1928	8.08129
1896	469.439	1	0	863.011	37.6806	0.629987	55.12	0.532869	24.4813	0.0915511	0.05	9.86326	4.56216	19.7265	7.01045
1897	333.822	1	0.00351907	553.797	25.0462	0.49224	82.0973	0.5827	38.3327	0.710778	0.59	2.97701	5.18322	5.95403	7.88736
1898	44.5361	1	0	5387.92	30.5644	0.285194	81.9536	0.00823143	8.09592	0.652484	0.47	3.99417	5.66989	7.98834	8.44561
1899	197.327	1	2.11103	422.712	9.27682	0.0661203	69.688	0.456498	48.6545	0.952846	0.89	0.652989	2.72102	1.30598	3.7445
1900	96.0767	1	0.155769	522.291	11.7825	0.144737	75.0542	0.180435	49.3863	0.928289	0.86	0.814929	2.99141	1.62986	4.07993
1901	479.333	1	0	1049.69	36.2238	0.76681	66.2763	0.4499	48.2311	0.0203433	0	10.246	4.24166	20.4921	5.63434
1902	156.055	1	0.00620006	441.643	23.3815	0.426741	35.7698	0.339266	26.9961	0.803315	0.64	2.52242	4.91726	5.04484	7.30405
1903	412.572	1	0.0109216	646.267	22.067	0.385457	136.582	0.622147	48.6777	0.774758	0.62	2.59605	4.98747	5.1921	7.098
1904	360.818	1	0	1591.55	31.5074	0.856437	128.481	0.223977	33.3131	0.460312	0.18	6.04899	5.97838	12.098	7.50387
1905	258.261	1	0	3707.17	38.6788	0.661371	136.717	0.069299	30.9046	0.141741	0.05	9.54259	4.8549	19.0852	6.94327
1906	256.235	1	0	1258.13	32.7192	0.460879	61.6137	0.200698	7.61212	0.384069	0.16	7.06305	5.82054	14.1261	8.33693
1907	75.3155	1	6.10866	489.035	3.96159	0.00116944	127.387	0.152909	15.2247	0.972856	0.96	0.227308	1.60038	0.454615	2.24586
1908	596.574	1	0	1106.58	33.5618	1.06248	79.9573	0.533727	43.1927	0.0242043	0	11.1971	2.96436	22.3942	4.11812
1909	452.277	1	0	670.333	37.4618	0.548571	45.9732	0.655238	24.0447	0.235262	0.08	8.77309	5.34024	17.5462	7.87205
1910	422.394	1	0	1424.96	37.0615	0.448733	114.382	0.291743	41.58	0.339696	0.17	7.09452	5.90429	14.189	8.58581
1911	368.408	1	0	1099.49	38.0595	0.473847	79.0063	0.327821	35.4521	0.369086	0.23	6.87124	5.96189	13.7425	9.18469
1912	72.4368	1	4.97917	727.968	6.46328	0.0220971	104.342	0.0987551	9.45441	0.945938	0.92	0.473481	2.32947	0.946962	3.23338
1913	444.191	1	0	940.343	38.1354	0.611284	57.6069	0.463181	48.6641	0.105866	0.04	9.73926	4.72367	19.4785	6.65188
1914	117.134	1	0	4566.62	40.8564	0.568699	87.0935	0.0255152	31.1354	0.244754	0.09	8.36912	5.54603	16.7382	7.9613
1915	294.176	1	0	533.568	37.895	0.429455	23.2687	0.531337	22.3186	0.181931	0.08	8.90543	5.29616	17.8109	7.55064
1916	478.78	1	0	1496.25	33.1691	0.766039	120.813	0.316369	11.7592	0.263314	0.09	8.03095	5.52112	16.0619	7.75898
1917	146.386	1	0	2902.23	36.7324	0.502757	60.0994	0.0501372	13.6569	0.160476	0.02	9.62566	4.82179	19.2513	6.37012
1918	239.528	1	0	3044.64	34.0247	0.934157	92.6907	0.0783491	8.69275	0.0350155	0.01	10.7336	3.69544	21.4672	5.11081
1919	354.95	1	0	1008.45	29.4339	0.296684	86.8322	0.345688	7.68561	0.533484	0.32	5.54615	5.99976	11.0923	9.14154
1920	538.321	1	0	995.739	31.786	0.534408	114.997	0.530367	30.7869	0.447995	0.19	6.26407	6.00764	12.5281	7.91767
1921	67.7254	1	0	1625.96	32.7288	0.605837	35.3273	0.041039	40.5964	0.668787	0.41	4.20708	5.76845	8.41416	7.92014
1922	248.513	1	0.0226133	538.968	19.3271	0.686889	63.082	0.449683	9.60585	0.716692	0.57	2.8269	5.13211	5.65381	6.94281
1923	168.269	1	3.09367	671.5	8.405	0.0719112	137.491	0.247759	46.4305	0.959712	0.91	0.544928	2.52085	1.08986	3.48908
1924	314.331	1	0	507.87	35.5488	0.474549	24.9144	0.597037	13.2104	0.285241	0.07	8.46706	5.55809	16.9341	7.64174
1925	191.99	1	0	2658.34	34.7957	0.387189	74.31	0.0717873	8.37139	0.116157	0.02	9.35185	4.97311	18.7037	6.50413
1926	244.311	1	0.0186483	1247.59	23.3236	0.361388	136.893	0.193146	15.1804	0.675739	0.59	3.00211	5.23114	6.00422	7.93063
1927	459.889	1	0	946.887	29.257	0.532595	101.653	0.476755	13.2357	0.432022	0.25	5.76038	5.99339	11.5208	8.29223
1928	401.721	1	0	859.123	35.0161	0.826354	43.5098	0.460296	27.3556	0.0627759	0	10.6964	3.77997	21.3928	5.08703
1929	47.7186	1	0	4515.17	34.5399	0.617965	71.2073	0.0105073	44.3111	0.666043	0.43	4.1209	5.71748	8.2418	8.24438
1930	414.625	1	0	1102.31	36.6469	0.603133	82.3277	0.368869	20.8373	0.307577	0.17	7.45786	5.97078	14.9157	8.87454
1931	93.5768	1	0	5582.91	41.9593	0.465006	92.7052	0.0166818	48.0751	0.324401	0.13	7.68313	5.76559	15.3663	8.3143
1932	199.875	1	0	844.223	39.0164	0.533688	22.9175	0.231467	29.0248	0.138547	0.04	9.86078	4.63073	19.7216	6.65522
1933	338.747	1	0	485.26	32.9061	0.616443	39.7877	0.667692	48.3726	0.482336	0.28	5.4132	6.04623	10.8264	8.15514
1934	324.006	1	0	1114.93	31.0152	0.709952	105.471	0.285031	44.0867	0.581273	0.38	4.60185	5.87261	9.2037	8.29892
1935	102.082	1	0	5642.26	37.7238	0.817559	95.5965	0.0180244	7.05332	0.230379	0.11	8.22247	5.64009	16.4449	8.21702
1936	205.705	1	0	950.045	36.2917	0.52504	28.3248	0.212553	33.9811	0.127	0	9.27827	5.07576	18.5565	6.07538
1937	158.747	1	0.00073879	657.353	16.6791	0.375846	80.7826	0.236737	22.4317	0.804147	0.72	1.73434	4.23765	3.46868	5.76428
1938	449.289	1	0	1947.28	37.0364	0.549256	132.201	0.228488	25.0362	0.132475	0.06	8.97762	5.261	17.9552	7.48985
1939	285.394	1	0	860.552	26.2217	0.547041	93.4213	0.324412	41.2476	0.707353	0.48	3.52275	5.49226	7.04549	7.49657
1940	263.494	1	0	418.532	26.6761	0.639714	38.3425	0.602034	34.5013	0.67231	0.45	3.76769	5.59059	7.53537	7.49173
1941	243.645	1	0	2040.04	38.8641	0.463257	85.9135	0.118089	20.6601	0.31886	0.15	7.83616	5.73778	15.6723	8.76603
1942	194.808	1	0	381.295	30.925	0.452296	23.9389	0.48196	28.8222	0.646323	0.48	4.00964	5.75229	8.01927	8.7323
1943	149.062	1	0.00707965	1078.62	15.7556	0.404789	109.583	0.136704	6.93426	0.836979	0.69	1.98725	4.50897	3.9745	6.23027
1944	102.617	1	0.002282	1978.16	21.6763	0.572624	125.612	0.0514256	35.5291	0.743435	0.66	2.19315	4.70689	4.38631	6.42846
1945	138.268	1	0.0024991	1604.91	21.5922	0.475913	134.739	0.0852433	48.6618	0.816598	0.65	2.23024	4.70751	4.46048	6.34207
1946	226.658	1	0	2289.01	35.7535	0.660812	94.2701	0.0981277	21.8704	0.383898	0.11	7.4712	5.85532	14.9424	7.78759
1947	131.341	1	0.00511755	602.878	24.0814	0.642146	36.6072	0.211425	15.5223	0.757575	0.59	2.86935	5.13919	5.73871	7.59141
1948	362.774	1	0	578.042	37.5158	0.600308	28.9635	0.608345	36.16	0.156794	0.03	9.61377	4.8945	19.2275	6.59352
1949	145.013	1	0	4724.75	39.4022	0.824702	92.1915	0.0305684	20.0753	0.0484867	0.04	10.1395	4.4413	20.279	6.62362
1950	371.523	1	0	756.503	35.3356	1.09046	34.7893	0.482438	43.3754	0.0170464	0	10.8716	3.53219	21.7432	4.75312
1951	391.744	1	0	853.165	27.2696	0.774798	104.601	0.449315	27.9713	0.590763	0.39	4.28308	5.69084	8.56617	7.87401
1952	102.094	1	2.39384	769.302	9.19526	0.0782372	127.894	0.131364	12.7449	0.929102	0.9	0.672389	2.80346	1.34478	4.24834
1953	140.722	1	0	2899.17	37.5932	0.642102	84.3062	0.0481329	30.0144	0.429389	0.2	6.57364	6.06049	13.1473	8.46428
1954	118.944	1	0.986746	380.588	10.6672	0.108776	45.9809	0.303253	32.7518	0.938414	0.87	0.778708	2.96718	1.55742	4.0586
1955	343.641	1	0	2428.24	35.7458	0.990573	108.953	0.140656	19.4606	0.0480131	0.01	10.4275	4.05607	20.855	5.71912
1956	270.848	1	0	1140.42	38.6513	0.516285	46.6394	0.233237	29.9286	0.337173	0.07	8.90949	5.37073	17.819	7.49847
1957	121.093	1	2.65339	280.288	8.77671	0.0706217	21.7853	0.417985	20.6718	0.918579	0.91	0.594642	2.61366	1.18928	3.90846
1958	214.877	1	0.0197067	345.978	13.2622	0.310037	74.7912	0.602552	19.2627	0.899546	0.79	1.31438	3.76298	2.62875	5.30728
1959	406.75	1	0	884.602	27.6085	0.348915	99.4149	0.450697	12.0237	0.572439	0.36	4.85966	5.93915	9.71933	8.59433
1960	261.94	1	2.36372	429.273	8.82872	0.046681	130.879	0.599515	34.6414	0.934631	0.88	0.712103	2.83707	1.42421	3.89292
1961	405.29	1	0	1042.49	34.9681	0.775982	52.8808	0.383852	26.8793	0.0191197	0	10.8066	3.72195	21.6133	4.99879
1962	66.9304	1	0.00091222	1580.3	23.6809	0.385896	61.3234	0.0418495	30.7133	0.827181	0.65	2.33357	4.77303	4.66714	6.78231
1963	240.197	1	0.294083	484	11.3412	0.179108	128.437	0.487196	20.3265	0.925174	0.8	1.16314	3.50832	2.32629	4.69125
1964	710.089	1	0	1107.79	32.5427	1.08471	100.507	0.634513	9.88284	0.0324061	0	10.613	3.94321	21.2261	5.41763
1965	505.392	1	0	1263.7	36.0832	0.600847	121.852	0.393095	25.9982	0.348546	0.2	7.05723	6.00579	14.1145	9.017
1966	263.923	1	0	941.935	36.6196	0.665852	60.5893	0.272757	47.9603	0.524188	0.33	5.4714	6.04063	10.9428	9.2221
1967	134.929	1	7.6138	227.355	4.35281	0.0165458	43.9878	0.584115	8.88825	0.964647	0.94	0.37051	2.11423	0.741019	2.95089
1968	365.827	1	0	1844.3	37.9635	0.594424	92.6612	0.196416	32.2625	0.0587466	0.03	9.8769	4.65947	19.7538	6.65689
1969	378.857	1	0	1182.22	35.6496	1.1471	54.4008	0.316886	40.333	0.0372321	0	11.1524	3.43709	22.3049	4.70492
1970	224.244	1	6.51871	357.812	4.63985	0.0234558	124.502	0.619591	38.6283	0.937419	0.95	0.288844	1.81038	0.577689	2.53367
1971	50.9625	1	0	5338.12	33.9115	0.301099	97.229	0.00950012	36.3319	0.69595	0.5	3.81406	5.59725	7.62812	8.50746
1972	688.593	1	0	1214.56	36.5569	0.660102	115.629	0.559116	30.2778	0.149922	0.04	9.77124	4.73743	19.5425	6.81798
1973	211.874	1	0.000307233	485.646	17.2302	0.42436	85.7196	0.424019	47.4229	0.836908	0.75	1.5979	4.15834	3.19579	5.76353
1974	500.106	1	0	830.529	38.123	0.558699	58.6587	0.588574	25.6243	0.176807	0.07	9.48103	4.90347	18.9621	7.53804
1975	415.162	1	0.00708687	797.348	24.3447	0.415883	131.829	0.509419	22.775	0.624713	0.54	3.36129	5.42254	6.72257	8.07432
1976	114.665	1	0	1080.9	35.2813	0.388816	31.1211	0.10372	19.4631	0.510914	0.33	5.33407	6.07172	10.6681	8.94265
1977	63.8112	1	0.0851496	986.864	12.3741	0.0352436	98.3393	0.0639674	37.8757	0.921421	0.86	0.840252	3.07893	1.6805	4.1987
1978	602.823	1	0	921.93	32.5495	0.516504	125.573	0.639518	26.377	0.493134	0.27	5.92968	6.10251	11.8594	8.94043
1979	387.048	1	0	799.491	36.2143	0.524404	45.0321	0.473576	30.1532	0.16015	0.03	9.20814	4.97469	18.4163	6.65336
1980	152.331	1	0	1335.45	34.968	0.710669	27.864	0.112784	5.0279	0.0869212	0.02	9.88864	4.64235	19.7773	6.34143
1981	438.887	1	0	705.486	37.7255	0.689297	46.3648	0.605012	30.0058	0.215033	0.07	8.89671	5.33523	17.7934	7.60408
1982	640.409	1	0	1154.93	37.1397	0.629077	99.9884	0.546376	49.4736	0.142319	0.02	9.98463	4.69015	19.9693	6.36681
1983	437.689	1	0	1504.88	36.8427	0.436667	104.868	0.287058	22.9269	0.206066	0.09	8.49201	5.42718	16.984	7.9196
1984	98.5346	1	0	3773.42	34.1638	0.724092	94.6878	0.0259514	37.9815	0.542876	0.27	5.34582	6.01342	10.6916	7.80711
1985	320.401	1	0	512.59	34.4941	0.510486	31.6973	0.600627	13.7454	0.353495	0.21	6.82026	6.11105	13.6405	8.81492
1986	211.533	1	0.000973276	499.05	26.5005	0.465579	33.8057	0.408917	9.23696	0.600221	0.44	4.12568	5.72118	8.25135	8.37555
1987	251.332	1	4.24238	438.474	6.93949	0.0372401	134.161	0.565275	41.7654	0.943916	0.92	0.478523	2.36096	0.957046	3.2775
1988	264.123	1	0	578.007	35.2229	0.443818	30.589	0.440161	23.3966	0.420449	0.2	6.58553	6.00946	13.1711	8.44818
1989	91.6247	1	0.000685455	1000.76	26.336	0.51104	44.8999	0.0896863	24.211	0.746256	0.62	2.73939	5.04233	5.47878	7.78953
1990	161.911	1	0.0285284	421.014	17.2825	0.306528	43.9878	0.372893	8.69358	0.820428	0.7	2.04682	4.55778	4.09365	6.68015
1991	187.999	1	0.335625	287.719	11.2553	0.0498826	64.8429	0.632103	35.8848	0.897301	0.84	0.934315	3.1865	1.86863	4.31817
1992	376.75	1	0	704.62	31.5551	0.56444	55.0935	0.520866	17.4728	0.422998	0.18	6.43003	5.98625	12.8601	7.89591
1993	124.953	1	0	1154.08	40.7275	0.513582	20.6639	0.106248	32.4024	0.133041	0.05	9.38121	4.98839	18.7624	7.17717
1994	367.245	1	0	576.763	33.2938	0.543267	37.229	0.617276	9.89149	0.28763	0.13	7.55561	5.72931	15.1112	8.17309
1995	343.622	1	0	907.997	36.3901	0.623792	57.0059	0.369588	24.3662	0.397408	0.16	7.32225	5.91558	14.6445	8.47659
1996	137.343	1	1.44489	246.927	10.1729	0.15038	34.8072	0.532231	23.9707	0.941577	0.91	0.651853	2.71374	1.30371	4.44659
1997	221.81	1	0	1886.58	40.7998	0.584562	71.0894	0.116042	23.4209	0.286467	0.17	7.9586	5.71815	15.9172	9.13216
1998	211.938	1	0	567.914	27.3764	0.685127	40.3695	0.360811	18.6116	0.638102	0.45	3.94883	5.66556	7.89767	8.03003
1999	557.806	1	0	1063.82	35.1723	0.495233	93.4469	0.515586	31.6093	0.203675	0.05	8.55366	5.55132	17.1073	7.11488
2000	498.609	1	0.000549126	922.315	26.4039	0.623844	124.605	0.531121	16.0786	0.563516	0.3	4.96664	5.95016	9.93327	7.75202
2001	507.022	1	0	1364.59	35.863	0.427233	125.777	0.365919	24.5585	0.312006	0.16	7.42107	5.87584	14.8421	8.64318
2002	359.184	1	0	1010.61	28.7983	0.638842	108.941	0.348569	27.5697	0.635292	0.39	4.47653	5.89057	8.95306	8.20999
2003	275.535	1	0	515.625	34.3858	0.532531	31.0901	0.512136	26.7656	0.433187	0.25	5.9994	6.05386	11.9988	8.57203
2004	452.544	1	0	1349.61	38.4774	0.62451	100.308	0.329921	39.558	0.24639	0.11	8.20672	5.71024	16.4134	8.25407
[truncated: 3,001 more rows]
